# Supplementary material for: HLA diversity in the Argentinian Umbilical Cord Blood Bank: frequencies according to donor’s reported ancestry and geographical distribution
Source: PubMed Central journal article supplement (PMC7892815; doi:10.1038/s41598-021-83282-1), 2021-02-18
Supplement: 41598_2021_83282_MOESM1_ESM.pdf [file 41598_2021_83282_MOESM1_ESM.pdf]

**HLA diversity in the Argentinean Umbilical Cord Blood Bank: frequencies according to donor's reported ancestry and geographical distribution.**

Fernández Souto, Daniela. BS, Cord Blood Bank, Hemotherapy Regional Center, Hospital de Pediatría Dr. Juan P. Garrahan, Buenos Aires, Argentina.

Rosello, Julieta. BS, Cord Blood Bank, Hemotherapy Regional Center, Hospital de Pediatría Dr. Juan P. Garrahan, Buenos Aires, Argentina.

Lazo, Laura. Hematology Tech, Cord Blood Bank, Hemotherapy Regional Center, Hospital de Pediatría Dr. Juan P. Garrahan, Buenos Aires, Argentina.

Veloso, Florencia. Hematology Tech, Cord Blood Bank, Hemotherapy Regional Center, Hospital de Pediatría Dr. Juan P. Garrahan, Buenos Aires, Argentina.

Gamba, Cecilia. MSC. Cord Blood Bank, Hemotherapy Regional Center, Hospital de Pediatría Dr. Juan P. Garrahan, Buenos Aires, Argentina.

Kuperman, Silvina. MD. Cord Blood Bank, Hemotherapy Regional Center, Hospital de Pediatría Dr. Juan P. Garrahan, Buenos Aires, Argentina.

Roca, Valeria\* PhD. Cord Blood Bank, Hemotherapy Regional Center, Hospital de Pediatría Dr. Juan P. Garrahan, Buenos Aires, Argentina and National Scientific and Technical Research Council (CONICET), Argentina.

**\*Corresponding Author:** Roca Valeria, PhD.

Combate de los Pozos 1881, (1245) Buenos Aires, Argentina.

Phone +54 9 11 41226000 ext 6910.

[vroca@garrahan.gov.ar](mailto:vroca@garrahan.gov.ar)

Supplementary Table 1: Allele frequency for all loci

For the General population (451 UCB units, 902 alleles), for SAE group (171 UCB units, 342 alleles) and for SAA group (184 UCB units, 368 alleles) N: Number of alleles present, Abs Freq: Absolute frequency, Rel Freq: Relative Frequency within each group

| HLA-A       | General (2N=902) |          | SAE (2N=342) |          |          | SAA (2N=368) |          |          |
|-------------|------------------|----------|--------------|----------|----------|--------------|----------|----------|
|             | N                | Abs Freq | N            | Abs Freq | Rel Freq | N            | Abs Freq | Rel Freq |
| A*01:01:01G | 81               | 0,0898   | 33           | 0,0366   | 0,0965   | 34           | 0,0377   | 0,0924   |
| A*01:104    | 1                | 0,0011   | 1            | 0,0011   | 0,0029   | 0            |          |          |
| A*02:01:01G | 216              | 0,2395   | 75           | 0,0831   | 0,2193   | 90           | 0,0998   | 0,2446   |
| A*02:02:01G | 5                | 0,0055   | 1            | 0,0011   | 0,0029   | 3            | 0,0033   | 0,0082   |
| A*02:04     | 4                | 0,0044   | 1            | 0,0011   | 0,0029   | 3            | 0,0033   | 0,0082   |
| A*02:05:01G | 10               | 0,0111   | 5            | 0,0055   | 0,0146   | 2            | 0,0022   | 0,0054   |
| A*02:06:01G | 4                | 0,0044   | 1            | 0,0011   | 0,0029   | 1            | 0,0011   | 0,0027   |
| A*02:11:01G | 12               | 0,0133   | 2            | 0,0022   | 0,0058   | 8            | 0,0089   | 0,0217   |
| A*02:13     | 1                | 0,0011   | 1            | 0,0011   | 0,0029   | 0            |          |          |
| A*02:22:01G | 1                | 0,0011   | 0            |          |          | 1            | 0,0011   | 0,0027   |
| A*02:33     | 2                | 0,0022   | 0            |          |          | 1            | 0,0011   | 0,0027   |
| A*03:01:01G | 82               | 0,0909   | 33           | 0,0366   | 0,0965   | 30           | 0,0333   | 0,0815   |
| A*03:02:01G | 3                | 0,0033   | 2            | 0,0022   | 0,0058   | 1            | 0,0011   | 0,0027   |
| A*03:08     | 1                | 0,0011   | 0            |          |          | 1            | 0,0011   | 0,0027   |
| A*11:01:01G | 45               | 0,0499   | 20           | 0,0222   | 0,0585   | 20           | 0,0222   | 0,0543   |
| A*23:01:01G | 20               | 0,0222   | 5            | 0,0055   | 0,0146   | 7            | 0,0078   | 0,0190   |
| A*24:02:01G | 91               | 0,1009   | 44           | 0,0488   | 0,1287   | 28           | 0,0310   | 0,0761   |
| A*24:02:02  | 1                | 0,0011   | 0            | 0,0000   | 0,0000   | 0            |          |          |
| A*24:03:01G | 15               | 0,0166   | 5            | 0,0055   | 0,0146   | 8            | 0,0089   | 0,0217   |
| A*24:175    | 1                | 0,0011   | 0            |          |          | 1            | 0,0011   | 0,0027   |
| A*25:01:01G | 15               | 0,0166   | 8            | 0,0089   | 0,0234   | 4            | 0,0044   | 0,0109   |
| A*26:01:01G | 29               | 0,0322   | 16           | 0,0177   | 0,0468   | 8            | 0,0089   | 0,0217   |
| A*29:01:01G | 2                | 0,0022   | 1            | 0,0011   | 0,0029   | 1            | 0,0011   | 0,0027   |
| A*29:02:01G | 35               | 0,0388   | 13           | 0,0144   | 0,0380   | 17           | 0,0188   | 0,0462   |
| A*30:01:01G | 15               | 0,0166   | 8            | 0,0089   | 0,0234   | 5            | 0,0055   | 0,0136   |
| A*30:02:01G | 20               | 0,0222   | 6            | 0,0067   | 0,0175   | 8            | 0,0089   | 0,0217   |
| A*30:04:01G | 1                | 0,0011   | 1            | 0,0011   | 0,0029   | 0            | 0,0000   | 0,0000   |
| A*31:01:02G | 60               | 0,0665   | 19           | 0,0211   | 0,0556   | 31           | 0,0344   | 0,0842   |
| A*31:02     | 1                | 0,0011   | 0            |          |          | 1            | 0,0011   | 0,0027   |
| A*32:01:01G | 32               | 0,0355   | 13           | 0,0144   | 0,0380   | 8            | 0,0089   | 0,0217   |
| A*33:01:01G | 16               | 0,0177   | 10           | 0,0111   | 0,0292   | 4            | 0,0044   | 0,0109   |
| A*33:03:01G | 4                | 0,0044   | 0            |          |          | 3            | 0,0033   | 0,0082   |
| A*33:05     | 1                | 0,0011   | 0            |          |          | 1            | 0,0011   | 0,0027   |
| A*34:02:01  | 1                | 0,0011   | 0            |          |          | 1            | 0,0011   | 0,0027   |
| A*66:01:01G | 5                | 0,0055   | 1            | 0,0011   | 0,0029   | 2            | 0,0022   | 0,0054   |
| A*68:01:01G | 7                | 0,0078   | 4            | 0,0044   | 0,0117   | 1            | 0,0011   | 0,0027   |
| A*68:01:02G | 31               | 0,0344   | 6            | 0,0067   | 0,0175   | 19           | 0,0211   | 0,0516   |
| A*68:02:01G | 12               | 0,0133   | 1            | 0,0011   | 0,0029   | 7            | 0,0078   | 0,0190   |
| A*68:17     | 14               | 0,0155   | 2            | 0,0022   | 0,0058   | 7            | 0,0078   | 0,0190   |
| A*68:23     | 1                | 0,0011   | 1            | 0,0011   | 0,0029   | 0            |          |          |
| A*74:01:01G | 1                | 0,0011   | 1            | 0,0011   | 0,0029   | 0            |          |          |
| A*80:01:01G | 3                | 0,0033   | 2            | 0,0022   | 0,0058   | 1            | 0,0011   | 0,0027   |

| HLA-B       | General (2N=902) |        | SAE (2N=342) |          |          | SAA (2N=368) |          |          |
|-------------|------------------|--------|--------------|----------|----------|--------------|----------|----------|
|             | N                | Freq   | N            | Abs Freq | Rel Freq | N            | Abs Freq | Rel Freq |
| B*07:02:01G | 49               | 0,0543 | 23           | 0,0255   | 0,0673   | 15           | 0,0166   | 0,0408   |
| B*07:05:01G | 4                | 0,0044 | 1            | 0,0011   | 0,0029   | 2            | 0,0022   | 0,0054   |
| B*08:01:01G | 44               | 0,0488 | 14           | 0,0155   | 0,0409   | 21           | 0,0233   | 0,0571   |
| B*08:33     | 1                | 0,0011 | 0            |          |          | 0            |          |          |
| B*13:02:01G | 16               | 0,0177 | 9            | 0,0100   | 0,0263   | 4            | 0,0044   | 0,0109   |
| B*14:01:01  | 13               | 0,0144 | 8            | 0,0089   | 0,0234   | 3            | 0,0033   | 0,0082   |
| B*14:02:01G | 32               | 0,0355 | 13           | 0,0144   | 0,0380   | 10           | 0,0111   | 0,0272   |
| B*15:01:01G | 30               | 0,0333 | 7            | 0,0078   | 0,0205   | 18           | 0,0200   | 0,0489   |
| B*15:03:01G | 2                | 0,0022 | 0            |          |          | 1            | 0,0011   | 0,0027   |
| B*15:04:01G | 16               | 0,0177 | 0            |          |          | 11           | 0,0122   | 0,0299   |
| B*15:07:01G | 1                | 0,0011 | 0            |          |          | 1            | 0,0011   | 0,0027   |
| B*15:08:01  | 2                | 0,0022 | 0            |          |          | 1            | 0,0011   | 0,0027   |
| B*15:09     | 1                | 0,0011 | 1            | 0,0011   | 0,0029   | 0            |          |          |
| B*15:10:01  | 3                | 0,0033 | 0            |          |          | 2            | 0,0022   | 0,0054   |
| B*15:15     | 1                | 0,0011 | 0            |          |          | 1            | 0,0011   | 0,0027   |
| B*15:17:01G | 6                | 0,0067 | 3            | 0,0033   | 0,0088   | 3            | 0,0033   | 0,0082   |
| B*15:18:01G | 2                | 0,0022 | 2            | 0,0022   | 0,0058   | 0            | 0,0000   | 0,0000   |
| B*15:20     | 2                | 0,0022 | 1            | 0,0011   | 0,0029   | 1            | 0,0011   | 0,0027   |
| B*15:27:02  | 1                | 0,0011 | 0            |          |          | 0            |          |          |
| B*15:70     | 1                | 0,0011 | 0            |          |          | 0            |          |          |
| B*18:01:01G | 58               | 0,0643 | 29           | 0,0322   | 0,0848   | 16           | 0,0177   | 0,0435   |
| B*18:03     | 1                | 0,0011 | 1            | 0,0011   | 0,0029   | 0            | 0,0000   | 0,0000   |
| B*27:02:01  | 3                | 0,0033 | 2            | 0,0022   | 0,0058   | 1            | 0,0011   | 0,0027   |
| B*27:05:02G | 12               | 0,0133 | 5            | 0,0055   | 0,0146   | 6            | 0,0067   | 0,0163   |
| B*27:05:03  | 1                | 0,0011 | 1            | 0,0011   | 0,0029   | 0            |          |          |
| B*27:07:01G | 1                | 0,0011 | 1            | 0,0011   | 0,0029   | 0            |          |          |
| B*35:01:01G | 48               | 0,0532 | 23           | 0,0255   | 0,0673   | 16           | 0,0177   | 0,0435   |
| B*35:02:01G | 11               | 0,0122 | 5            | 0,0055   | 0,0146   | 3            | 0,0033   | 0,0082   |
| B*35:03:01G | 9                | 0,0100 | 4            | 0,0044   | 0,0117   | 2            | 0,0022   | 0,0054   |
| B*35:04:01  | 11               | 0,0122 | 0            |          |          | 10           | 0,0111   | 0,0272   |
| B*35:05:01  | 14               | 0,0155 | 1            | 0,0011   | 0,0029   | 11           | 0,0122   | 0,0299   |
| B*35:06     | 2                | 0,0022 | 0            |          |          | 1            | 0,0011   | 0,0027   |
| B*35:08:01  | 10               | 0,0111 | 3            | 0,0033   | 0,0088   | 5            | 0,0055   | 0,0136   |
| B*35:09:01  | 7                | 0,0078 | 3            | 0,0033   | 0,0088   | 1            | 0,0011   | 0,0027   |
| B*35:19     | 3                | 0,0033 | 1            | 0,0011   | 0,0029   | 2            | 0,0022   | 0,0054   |
| B*35:20:01  | 4                | 0,0044 | 2            | 0,0022   | 0,0058   | 1            | 0,0011   | 0,0027   |
| B*35:21     | 4                | 0,0044 | 0            |          |          | 3            | 0,0033   | 0,0082   |
| B*37:01:01G | 5                | 0,0055 | 2            | 0,0022   | 0,0058   | 3            | 0,0033   | 0,0082   |
| B*38:01:01  | 17               | 0,0188 | 9            | 0,0100   | 0,0263   | 5            | 0,0055   | 0,0136   |
| B*39:01:01G | 8                | 0,0089 | 4            | 0,0044   | 0,0117   | 3            | 0,0033   | 0,0082   |
| B*39:02:02  | 1                | 0,0011 | 1            | 0,0011   | 0,0029   | 0            | 0,0000   | 0,0000   |
| B*39:03     | 11               | 0,0122 | 5            | 0,0055   | 0,0146   | 3            | 0,0033   | 0,0082   |
| B*39:05:01  | 15               | 0,0166 | 2            | 0,0022   | 0,0058   | 12           | 0,0133   | 0,0326   |
| B*39:06:02  | 3                | 0,0033 | 2            | 0,0022   | 0,0058   | 1            | 0,0011   | 0,0027   |
| B*39:09:01  | 5                | 0,0055 | 1            | 0,0011   | 0,0029   | 2            | 0,0022   | 0,0054   |
| B*39:10:01  | 1                | 0,0011 | 0            |          |          | 1            | 0,0011   | 0,0027   |
| B*39:11     | 1                | 0,0011 | 0            |          |          | 0            |          |          |
| B*39:13:01  | 2                | 0,0022 | 0            |          |          | 2            | 0,0022   | 0,0054   |
| B*39:14     | 2                | 0,0022 | 1            | 0,0011   | 0,0029   | 1            | 0,0011   | 0,0027   |
| B*40:01:01G | 23               | 0,0255 | 8            | 0,0089   | 0,0234   | 8            | 0,0089   | 0,0217   |
| B*40:02:01G | 21               | 0,0233 | 8            | 0,0089   | 0,0234   | 12           | 0,0133   | 0,0326   |
| B*40:04     | 14               | 0,0155 | 1            | 0,0011   | 0,0029   | 12           | 0,0133   | 0,0326   |
| B*40:06:01G | 1                | 0,0011 | 0            |          |          | 1            | 0,0011   | 0,0027   |
| B*40:08     | 2                | 0,0022 | 0            |          |          | 1            | 0,0011   | 0,0027   |
| B*41:01:01  | 9                | 0,0100 | 3            | 0,0033   | 0,0088   | 3            | 0,0033   | 0,0082   |
| B*41:02:01G | 4                | 0,0044 | 1            | 0,0011   | 0,0029   | 2            | 0,0022   | 0,0054   |

|             |    |        |    |        |        |    |        |        |
|-------------|----|--------|----|--------|--------|----|--------|--------|
| B*44:02:01G | 48 | 0,0532 | 17 | 0,0188 | 0,0497 | 18 | 0,0200 | 0,0489 |
| B*44:03:01G | 52 | 0,0576 | 26 | 0,0288 | 0,0760 | 18 | 0,0200 | 0,0489 |
| B*44:03:02G | 1  | 0,0011 | 1  | 0,0011 | 0,0029 | 0  |        |        |
| B*44:04     | 2  | 0,0022 | 0  |        |        | 1  | 0,0011 | 0,0027 |
| B*44:05:01  | 2  | 0,0022 | 2  | 0,0022 | 0,0058 | 0  |        | 0,0000 |
| B*45:01:01G | 8  | 0,0089 | 2  | 0,0022 | 0,0058 | 4  | 0,0044 | 0,0109 |
| B*46:01:01G | 1  | 0,0011 | 0  |        |        | 0  |        |        |
| B*47:01:01G | 3  | 0,0033 | 1  | 0,0011 | 0,0029 | 0  |        |        |
| B*48:01:01G | 10 | 0,0111 | 3  | 0,0033 | 0,0088 | 5  | 0,0055 | 0,0136 |
| B*48:02:01  | 8  | 0,0089 | 2  | 0,0022 | 0,0058 | 4  | 0,0044 | 0,0109 |
| B*48:03:01  | 1  | 0,0011 | 0  |        |        | 0  |        |        |
| B*49:01:01G | 11 | 0,0122 | 4  | 0,0044 | 0,0117 | 2  | 0,0022 | 0,0054 |
| B*49:18:02  | 1  | 0,0011 | 1  | 0,0011 | 0,0029 | 0  |        |        |
| B*50:01:01G | 12 | 0,0133 | 3  | 0,0033 | 0,0088 | 4  | 0,0044 | 0,0109 |
| B*50:02     | 1  | 0,0011 | 1  | 0,0011 | 0,0029 | 0  | 0,0000 | 0,0000 |
| B*51:01:01G | 82 | 0,0909 | 38 | 0,0421 | 0,1111 | 30 | 0,0333 | 0,0815 |
| B*51:04     | 1  | 0,0011 | 0  |        |        | 1  | 0,0011 | 0,0027 |
| B*51:07:01  | 1  | 0,0011 | 0  |        |        | 1  | 0,0011 | 0,0027 |
| B*51:08:01  | 2  | 0,0022 | 1  | 0,0011 | 0,0029 | 1  | 0,0011 | 0,0027 |
| B*51:13:01  | 2  | 0,0022 | 0  |        |        | 2  | 0,0022 | 0,0054 |
| B*52:01:01G | 7  | 0,0078 | 2  | 0,0022 | 0,0058 | 4  | 0,0044 | 0,0109 |
| B*52:01:02  | 4  | 0,0044 | 2  | 0,0022 | 0,0058 | 2  | 0,0022 | 0,0054 |
| B*53:01:01G | 11 | 0,0122 | 4  | 0,0044 | 0,0117 | 4  | 0,0044 | 0,0109 |
| B*55:01:01G | 9  | 0,0100 | 7  | 0,0078 | 0,0205 | 1  | 0,0011 | 0,0027 |
| B*56:01:01G | 3  | 0,0033 | 1  | 0,0011 | 0,0029 | 0  |        |        |
| B*57:01:01G | 22 | 0,0244 | 7  | 0,0078 | 0,0205 | 7  | 0,0078 | 0,0190 |
| B*57:03:01G | 5  | 0,0055 | 1  | 0,0011 | 0,0029 | 4  | 0,0044 | 0,0109 |
| B*58:01:01G | 14 | 0,0155 | 2  | 0,0022 | 0,0058 | 7  | 0,0078 | 0,0190 |
| B*58:02:01  | 4  | 0,0044 | 1  | 0,0011 | 0,0029 | 3  | 0,0033 | 0,0082 |
| B*67:01:02G | 1  | 0,0011 | 1  | 0,0011 | 0,0029 | 0  |        |        |
| B*78:01:01  | 1  | 0,0011 | 1  | 0,0011 | 0,0029 | 0  |        |        |
| B*81:01:01G | 1  | 0,0011 | 0  |        |        | 1  | 0,0011 | 0,0027 |

| HLA-C       | General (2N=902) |        | SAE (2N=342) |          |          | SAA (2N=368) |          |          |
|-------------|------------------|--------|--------------|----------|----------|--------------|----------|----------|
|             | N                | Freq   | N            | Abs Freq | Rel Freq | N            | Abs Freq | Rel Freq |
| C*01:02:01G | 23               | 0,0255 | 7            | 0,0078   | 0,0205   | 9            | 0,0100   | 0,0245   |
| C*02:02:02G | 39               | 0,0432 | 24           | 0,0266   | 0,0702   | 11           | 0,0122   | 0,0299   |
| C*02:10:01G | 2                | 0,0022 | 0            |          |          | 1            | 0,0011   | 0,0027   |
| C*02:14:01G | 1                | 0,0011 | 0            |          |          | 1            | 0,0011   | 0,0027   |
| C*03:02:01G | 2                | 0,0022 | 0            |          |          | 1            | 0,0011   | 0,0027   |
| C*03:03:01G | 44               | 0,0488 | 14           | 0,0155   | 0,0409   | 21           | 0,0233   | 0,0571   |
| C*03:04:01G | 58               | 0,0643 | 12           | 0,0133   | 0,0351   | 33           | 0,0366   | 0,0897   |
| C*03:04:02  | 3                | 0,0033 | 0            |          |          | 2            | 0,0022   | 0,0054   |
| C*03:05     | 1                | 0,0011 | 1            | 0,0011   | 0,0029   | 0            | 0,0000   | 0,0000   |
| C*04:01:01G | 143              | 0,1585 | 54           | 0,0599   | 0,1579   | 56           | 0,0621   | 0,1522   |
| C*05:01:01G | 57               | 0,0632 | 22           | 0,0244   | 0,0643   | 18           | 0,0200   | 0,0489   |
| C*05:09:01  | 1                | 0,0011 | 0            |          |          | 1            | 0,0011   | 0,0027   |
| C*06:02:01G | 69               | 0,0765 | 26           | 0,0288   | 0,0760   | 29           | 0,0322   | 0,0788   |
| C*06:30     | 1                | 0,0011 | 0            |          |          | 0            |          |          |
| C*07:01:01G | 105              | 0,1164 | 38           | 0,0421   | 0,1111   | 42           | 0,0466   | 0,1141   |
| C*07:02:01G | 95               | 0,1053 | 38           | 0,0421   | 0,1111   | 39           | 0,0432   | 0,1060   |
| C*07:04:01G | 8                | 0,0089 | 3            | 0,0033   | 0,0088   | 5            | 0,0055   | 0,0136   |
| C*07:206    | 1                | 0,0011 | 0            |          |          | 1            | 0,0011   | 0,0027   |
| C*08:01:01G | 10               | 0,0111 | 2            | 0,0022   | 0,0058   | 6            | 0,0067   | 0,0163   |
| C*08:02:01G | 40               | 0,0443 | 17           | 0,0188   | 0,0497   | 13           | 0,0144   | 0,0353   |
| C*08:03:01G | 5                | 0,0055 | 1            | 0,0011   | 0,0029   | 3            | 0,0033   | 0,0082   |
| C*12:02:01G | 7                | 0,0078 | 2            | 0,0022   | 0,0058   | 4            | 0,0044   | 0,0109   |
| C*12:03:01G | 52               | 0,0576 | 26           | 0,0288   | 0,0760   | 14           | 0,0155   | 0,0380   |
| C*14:02:01G | 15               | 0,0166 | 6            | 0,0067   | 0,0175   | 4            | 0,0044   | 0,0109   |
| C*14:03     | 1                | 0,0011 | 0            |          |          | 0            |          |          |
| C*15:02:01G | 48               | 0,0532 | 19           | 0,0211   | 0,0556   | 24           | 0,0266   | 0,0652   |
| C*15:03     | 1                | 0,0011 | 0            |          |          | 1            | 0,0011   | 0,0027   |
| C*15:05:01G | 6                | 0,0067 | 2            | 0,0022   | 0,0058   | 3            | 0,0033   | 0,0082   |
| C*15:08     | 1                | 0,0011 | 0            |          |          | 0            |          |          |
| C*16:01:01G | 43               | 0,0477 | 20           | 0,0222   | 0,0585   | 18           | 0,0200   | 0,0489   |
| C*16:02:01G | 5                | 0,0055 | 3            | 0,0033   | 0,0088   | 1            | 0,0011   | 0,0027   |
| C*16:04:01  | 3                | 0,0033 | 1            | 0,0011   | 0,0029   | 2            | 0,0022   | 0,0054   |
| C*17:01:01G | 11               | 0,0122 | 4            | 0,0044   | 0,0117   | 4            | 0,0044   | 0,0109   |
| C*18:01:01G | 1                | 0,0011 | 0            |          |          | 1            | 0,0011   | 0,0027   |

| HLA-DRB1       | General (2N=902) |        | SAE (2N=342) |          |          | SAA (2N=368) |          |          |
|----------------|------------------|--------|--------------|----------|----------|--------------|----------|----------|
|                | N                | Freq   | N            | Abs Freq | Rel Freq | N            | Abs Freq | Rel Freq |
| DRB1*01:01:01G | 44               | 0,0488 | 25           | 0,0277   | 0,0731   | 11           | 0,0122   | 0,0299   |
| DRB1*01:02:01  | 25               | 0,0277 | 11           | 0,0122   | 0,0322   | 9            | 0,0100   | 0,0245   |
| DRB1*01:03     | 14               | 0,0155 | 10           | 0,0111   | 0,0292   | 3            | 0,0033   | 0,0082   |
| DRB1*03:01:01G | 61               | 0,0676 | 19           | 0,0211   | 0,0556   | 27           | 0,0299   | 0,0734   |
| DRB1*03:02:01  | 1                | 0,0011 | 0            |          |          | 0            |          |          |
| DRB1*04:01:01G | 19               | 0,0211 | 8            | 0,0089   | 0,0234   | 10           | 0,0111   | 0,0272   |
| DRB1*04:02:01  | 22               | 0,0244 | 11           | 0,0122   | 0,0322   | 7            | 0,0078   | 0,0190   |
| DRB1*04:03:01  | 21               | 0,0233 | 7            | 0,0078   | 0,0205   | 9            | 0,0100   | 0,0245   |
| DRB1*04:04:01  | 35               | 0,0388 | 12           | 0,0133   | 0,0351   | 18           | 0,0200   | 0,0489   |
| DRB1*04:05:01  | 10               | 0,0111 | 5            | 0,0055   | 0,0146   | 1            | 0,0011   | 0,0027   |
| DRB1*04:05:04  | 1                | 0,0011 | 0            |          |          | 1            | 0,0011   | 0,0027   |
| DRB1*04:06:01G | 1                | 0,0011 | 1            | 0,0011   | 0,0029   | 0            |          |          |
| DRB1*04:07:01G | 20               | 0,0222 | 7            | 0,0078   | 0,0205   | 10           | 0,0111   | 0,0272   |
| DRB1*04:07:03  | 5                | 0,0055 | 1            | 0,0011   | 0,0029   | 4            | 0,0044   | 0,0109   |
| DRB1*04:08:01  | 3                | 0,0033 | 0            |          |          | 3            | 0,0033   | 0,0082   |
| DRB1*04:10:01G | 1                | 0,0011 | 0            |          |          | 0            |          |          |
| DRB1*04:11:01  | 20               | 0,0222 | 4            | 0,0044   | 0,0117   | 13           | 0,0144   | 0,0353   |
| DRB1*07:01:01G | 93               | 0,1031 | 43           | 0,0477   | 0,1257   | 31           | 0,0344   | 0,0842   |
| DRB1*08:01:01G | 11               | 0,0122 | 3            | 0,0033   | 0,0088   | 5            | 0,0055   | 0,0136   |
| DRB1*08:02:01  | 29               | 0,0322 | 8            | 0,0089   | 0,0234   | 16           | 0,0177   | 0,0435   |
| DRB1*08:03:02  | 1                | 0,0011 | 0            |          |          | 0            |          |          |
| DRB1*08:04:01  | 7                | 0,0078 | 2            | 0,0022   | 0,0058   | 5            | 0,0055   | 0,0136   |
| DRB1*08:07     | 9                | 0,0100 | 1            | 0,0011   | 0,0029   | 8            | 0,0089   | 0,0217   |
| DRB1*09:01:02G | 26               | 0,0288 | 5            | 0,0055   | 0,0146   | 16           | 0,0177   | 0,0435   |
| DRB1*10:01:01G | 8                | 0,0089 | 4            | 0,0044   | 0,0117   | 2            | 0,0022   | 0,0054   |
| DRB1*11:01:01G | 50               | 0,0554 | 24           | 0,0266   | 0,0702   | 16           | 0,0177   | 0,0435   |
| DRB1*11:01:02  | 5                | 0,0055 | 0            |          |          | 3            | 0,0033   | 0,0082   |
| DRB1*11:02:01  | 7                | 0,0078 | 1            | 0,0011   | 0,0029   | 6            | 0,0067   | 0,0163   |
| DRB1*11:03:01  | 9                | 0,0100 | 6            | 0,0067   | 0,0175   | 2            | 0,0022   | 0,0054   |
| DRB1*11:04:01G | 40               | 0,0443 | 20           | 0,0222   | 0,0585   | 13           | 0,0144   | 0,0353   |
| DRB1*12:01:01G | 9                | 0,0100 | 2            | 0,0022   | 0,0058   | 4            | 0,0044   | 0,0109   |
| DRB1*13:01:01G | 60               | 0,0665 | 22           | 0,0244   | 0,0643   | 27           | 0,0299   | 0,0734   |
| DRB1*13:02:01G | 35               | 0,0388 | 10           | 0,0111   | 0,0292   | 15           | 0,0166   | 0,0408   |
| DRB1*13:03:01  | 18               | 0,0200 | 9            | 0,0100   | 0,0263   | 4            | 0,0044   | 0,0109   |
| DRB1*13:04     | 1                | 0,0011 | 0            |          |          | 0            |          |          |
| DRB1*13:05:01  | 5                | 0,0055 | 4            | 0,0044   | 0,0117   | 0            |          |          |
| DRB1*14:01:01G | 28               | 0,0310 | 13           | 0,0144   | 0,0380   | 9            | 0,0100   | 0,0245   |
| DRB1*14:02:01  | 30               | 0,0333 | 2            | 0,0022   | 0,0058   | 18           | 0,0200   | 0,0489   |
| DRB1*14:02:02  | 1                | 0,0011 | 0            |          |          | 0            | 0,0000   | 0,0000   |
| DRB1*14:04:01  | 1                | 0,0011 | 0            |          |          | 1            | 0,0011   | 0,0027   |
| DRB1*14:06:01  | 2                | 0,0022 | 1            | 0,0011   | 0,0029   | 0            |          |          |
| DRB1*15:01:01G | 54               | 0,0599 | 26           | 0,0288   | 0,0760   | 14           | 0,0155   | 0,0380   |
| DRB1*15:02:01G | 8                | 0,0089 | 2            | 0,0022   | 0,0058   | 4            | 0,0044   | 0,0109   |
| DRB1*15:03:01G | 4                | 0,0044 | 0            |          |          | 2            | 0,0022   | 0,0054   |
| DRB1*16:01:01  | 21               | 0,0233 | 8            | 0,0089   | 0,0234   | 4            | 0,0044   | 0,0109   |
| DRB1*16:02:01G | 26               | 0,0288 | 4            | 0,0044   | 0,0117   | 17           | 0,0188   | 0,0462   |
| DRB1*16:07     | 1                | 0,0011 | 1            | 0,0011   | 0,0029   | 0            |          |          |

| HLA-DQB1       | General (2N=902) |        | SAE (2N=342) |          |          | SAA (2N=368) |          |          |
|----------------|------------------|--------|--------------|----------|----------|--------------|----------|----------|
|                | N                | Freq   | N            | Abs Freq | Rel Freq | N            | Abs Freq | Rel Freq |
| DQB1*02:01:01G | 140              | 0,1552 | 56           | 0,0621   | 0,1637   | 54           | 0,0599   | 0,1467   |
| DQB1*03:01:01G | 220              | 0,2439 | 82           | 0,0909   | 0,2398   | 89           | 0,0987   | 0,2418   |
| DQB1*03:02:01G | 138              | 0,1530 | 46           | 0,0510   | 0,1345   | 70           | 0,0776   | 0,1902   |
| DQB1*03:03:02G | 45               | 0,0499 | 14           | 0,0155   | 0,0409   | 22           | 0,0244   | 0,0598   |
| DQB1*03:04:01  | 4                | 0,0044 | 1            | 0,0011   | 0,0029   | 1            | 0,0011   | 0,0027   |
| DQB1*03:05:01G | 1                | 0,0011 | 0            |          |          | 0            |          |          |
| DQB1*04:02:01G | 49               | 0,0543 | 13           | 0,0144   | 0,0380   | 29           | 0,0322   | 0,0788   |
| DQB1*04:02:03  | 1                | 0,0011 | 0            |          |          | 1            | 0,0011   | 0,0027   |
| DQB1*05:01:01G | 97               | 0,1075 | 52           | 0,0576   | 0,1520   | 28           | 0,0310   | 0,0761   |
| DQB1*05:02:01G | 27               | 0,0299 | 10           | 0,0111   | 0,0292   | 6            | 0,0067   | 0,0163   |
| DQB1*05:03:01G | 28               | 0,0310 | 13           | 0,0144   | 0,0380   | 10           | 0,0111   | 0,0272   |
| DQB1*06:01:01G | 8                | 0,0089 | 2            | 0,0022   | 0,0058   | 4            | 0,0044   | 0,0109   |
| DQB1*06:02:01G | 54               | 0,0599 | 23           | 0,0255   | 0,0673   | 16           | 0,0177   | 0,0435   |
| DQB1*06:03:01G | 57               | 0,0632 | 21           | 0,0233   | 0,0614   | 24           | 0,0266   | 0,0652   |
| DQB1*06:04:01G | 25               | 0,0277 | 8            | 0,0089   | 0,0234   | 11           | 0,0122   | 0,0299   |
| DQB1*06:09:01G | 7                | 0,0078 | 1            | 0,0011   | 0,0029   | 3            | 0,0033   | 0,0082   |
| DQB1*06:11:01  | 1                | 0,0011 | 0            |          |          | 0            |          |          |

Supplementary Table 2: Hardy Weinberg equilibrium for all loci

Deviations from Hardy Weinberg equilibrium were calculated with exact test using a Markov chain for all Loci. #Genot: number of genotypes, Obs.Het.: Observed heterozygosity, Exp.Het.: Expected Heterozygosity, P- values < 0.05 are considered statistically significant and thus reflect differences between Obs. and Exp. Het., s.d.: standard deviation.

| <b>General Pop.</b> | <b>#Genot</b> | <b>Obs.Het.</b> | <b>Exp.Het.</b> | <b>P-value</b> | <b>s.d.</b> | <b>Steps done</b> |
|---------------------|---------------|-----------------|-----------------|----------------|-------------|-------------------|
| HLA-A               | 451           | 0.87583         | 0.90218         | 0.61165        | 0.00021     | 1001000           |
| HLA-B               | 451           | 0.96231         | 0.96560         | 0.65258        | 0.00012     | 1001000           |
| HLA-C               | 451           | 0.88692         | 0.92113         | 0.05660        | 0.00009     | 1001000           |
| HLA-DRB1            | 451           | 0.95787         | 0.95715         | 0.10500        | 0.00011     | 1001000           |
| HLA-DQB1            | 451           | 0.86031         | 0.86660         | 0.22456        | 0.00024     | 1001000           |

| <b>SAE</b> | <b>#Genot</b> | <b>Obs.Het.</b> | <b>Exp.Het.</b> | <b>P-value</b> | <b>s.d.</b> | <b>Steps done</b> |
|------------|---------------|-----------------|-----------------|----------------|-------------|-------------------|
| HLA-A      | 171           | 0.89474         | 0.90422         | 0.69159        | 0.00018     | 1001000           |
| HLA-B      | 171           | 0.95906         | 0.95630         | 0.22075        | 0.00007     | 1001000           |
| HLA-C      | 171           | 0.90643         | 0.91941         | 0.18921        | 0.00025     | 1001000           |
| HLA-DRB1   | 171           | 0.97076         | 0.94910         | 0.49087        | 0.00027     | 1001000           |
| HLA-DQB1   | 171           | 0.88304         | 0.86270         | 0.97326        | 0.00014     | 1001000           |

| <b>SAA</b> | <b>#Genot</b> | <b>Obs.Het.</b> | <b>Exp.Het.</b> | <b>P-value</b> | <b>s.d.</b> | <b>Steps done</b> |
|------------|---------------|-----------------|-----------------|----------------|-------------|-------------------|
| HLA-A      | 184           | 0.86957         | 0.90260         | 0.39033        | 0.00010     | 1001000           |
| HLA-B      | 184           | 0.96196         | 0.96978         | 0.61041        | 0.00010     | 1001000           |
| HLA-C      | 184           | 0.85870         | 0.92331         | 0.36152        | 0.00022     | 1001000           |
| HLA-DRB1   | 184           | 0.94022         | 0.96002         | 0.14377        | 0.00012     | 1001000           |
| HLA-DQB1   | 184           | 0.84783         | 0.86232         | 0.12825        | 0.00019     | 1001000           |



Supplementary Table 3: Linkage disequilibrium for all loci

Linkage disequilibrium (LD) analysis was performed between all pairs of loci with unknown gametic phase: + positive LD, - Negative LD (significance level  $p < 0.0500$ ).

| <b>General Pop.</b> | HLA-A | HLA-B | HLA-C | HLA-DRB1 | HLA-DQB1 |
|---------------------|-------|-------|-------|----------|----------|
| HLA-A               | *     | +     | +     | +        | +        |
| HLA-B               | +     | *     | +     | +        | +        |
| HLA-C               | +     | +     | *     | +        | +        |
| HLA-DRB1            | +     | +     | +     | *        | +        |
| HLA-DQB1            | +     | +     | +     | +        | *        |

  

| <b>SAE</b> | HLA-A | HLA-B | HLA-C | HLA-DRB1 | HLA-DQB1 |
|------------|-------|-------|-------|----------|----------|
| HLA-A      | *     | +     | +     | +        | -        |
| HLA-B      | +     | *     | +     | +        | +        |
| HLA-C      | +     | +     | *     | +        | +        |
| HLA-DRB1   | +     | +     | +     | *        | +        |
| HLA-DQB1   | -     | +     | +     | +        | *        |

  

| <b>SAA</b> | HLA-A | HLA-B | HLA-C | HLA-DRB1 | HLA-DQB1 |
|------------|-------|-------|-------|----------|----------|
| HLA-A      | *     | +     | +     | +        | +        |
| HLA-B      | +     | *     | +     | +        | +        |
| HLA-C      | +     | +     | *     | +        | +        |
| HLA-DRB1   | +     | +     | +     | *        | +        |
| HLA-DQB1   | +     | +     | +     | +        | *        |

Supplementary Table 4: Estimated haplotypes and frequencies for the general population. Five-locus haplotype frequencies (A~C~B~DRB1~DQB1) were estimated for the general population using the iterative expectation maximization (EM) algorithm ( $\epsilon=1e^{-7}$ ).

| Pos | Freq    | Haplotype   |             |             |                |                |
|-----|---------|-------------|-------------|-------------|----------------|----------------|
| 1   | 0,01663 | A*01:01:01G | C*07:01:01G | B*08:01:01G | DRB1*03:01:01G | DQB1*02:01:01G |
| 2   | 0,01545 | A*29:02:01G | C*16:01:01G | B*44:03:01G | DRB1*07:01:01G | DQB1*02:01:01G |
| 3   | 0,01330 | A*03:01:01G | C*07:02:01G | B*07:02:01G | DRB1*15:01:01G | DQB1*06:02:01G |
| 4   | 0,00887 | A*30:02:01G | C*05:01:01G | B*18:01:01G | DRB1*03:01:01G | DQB1*02:01:01G |
| 5   | 0,00776 | A*02:01:01G | C*07:02:01G | B*07:02:01G | DRB1*15:01:01G | DQB1*06:02:01G |
| 6   | 0,00776 | A*02:01:01G | C*15:02:01G | B*51:01:01G | DRB1*11:01:01G | DQB1*03:01:01G |
| 7   | 0,00769 | A*02:01:01G | C*05:01:01G | B*44:02:01G | DRB1*13:01:01G | DQB1*06:03:01G |
| 8   | 0,00665 | A*02:01:01G | C*05:01:01G | B*44:02:01G | DRB1*01:01:01G | DQB1*05:01:01G |
| 9   | 0,00665 | A*24:02:01G | C*12:03:01G | B*18:01:01G | DRB1*11:04:01G | DQB1*03:01:01G |
| 10  | 0,00665 | A*33:01:01G | C*08:02:01G | B*14:02:01G | DRB1*01:02:01  | DQB1*05:01:01G |
| 11  | 0,00660 | A*03:01:01G | C*04:01:01G | B*35:01:01G | DRB1*01:01:01G | DQB1*05:01:01G |
| 12  | 0,00554 | A*02:01:01G | C*03:04:01G | B*40:01:01G | DRB1*13:02:01G | DQB1*06:04:01G |
| 13  | 0,00554 | A*24:02:01G | C*07:01:01G | B*08:01:01G | DRB1*03:01:01G | DQB1*02:01:01G |
| 14  | 0,00554 | A*24:02:01G | C*04:01:01G | B*35:02:01G | DRB1*11:04:01G | DQB1*03:01:01G |
| 15  | 0,00554 | A*30:01:01G | C*06:02:01G | B*13:02:01G | DRB1*07:01:01G | DQB1*02:01:01G |
| 16  | 0,00554 | A*68:01:02G | C*03:04:01G | B*40:04     | DRB1*04:11:01  | DQB1*03:02:01G |
| 17  | 0,00444 | A*02:01:01G | C*05:01:01G | B*44:02:01G | DRB1*04:02:01  | DQB1*03:02:01G |
| 18  | 0,00444 | A*03:01:01G | C*04:01:01G | B*35:02:01G | DRB1*11:04:01G | DQB1*03:01:01G |
| 19  | 0,00444 | A*24:03:01G | C*03:04:01G | B*40:02:01G | DRB1*16:02:01G | DQB1*03:01:01G |
| 20  | 0,00444 | A*29:02:01G | C*16:01:01G | B*44:03:01G | DRB1*03:01:01G | DQB1*02:01:01G |
| 21  | 0,00439 | A*01:01:01G | C*06:02:01G | B*57:01:01G | DRB1*07:01:01G | DQB1*03:03:02G |
| 22  | 0,00339 | A*29:02:01G | C*16:01:01G | B*44:03:01G | DRB1*13:01:01G | DQB1*06:03:01G |
| 23  | 0,00333 | A*01:01:01G | C*07:01:01G | B*08:01:01G | DRB1*15:01:01G | DQB1*06:02:01G |
| 24  | 0,00333 | A*01:01:01G | C*15:02:01G | B*51:01:01G | DRB1*04:02:01  | DQB1*03:02:01G |

|    |         |             |             |             |                |                |
|----|---------|-------------|-------------|-------------|----------------|----------------|
| 25 | 0,00333 | A*02:01:01G | C*07:01:01G | B*08:01:01G | DRB1*03:01:01G | DQB1*02:01:01G |
| 26 | 0,00333 | A*02:01:01G | C*01:02:01G | B*15:04:01G | DRB1*14:02:01  | DQB1*03:01:01G |
| 27 | 0,00333 | A*02:01:01G | C*03:03:01G | B*15:04:01G | DRB1*16:02:01G | DQB1*03:02:01G |
| 28 | 0,00333 | A*02:01:01G | C*04:01:01G | B*35:01:01G | DRB1*07:01:01G | DQB1*02:01:01G |
| 29 | 0,00333 | A*02:01:01G | C*03:04:01G | B*40:01:01G | DRB1*04:04:01  | DQB1*03:02:01G |
| 30 | 0,00333 | A*02:01:01G | C*05:01:01G | B*44:02:01G | DRB1*11:04:01G | DQB1*03:01:01G |
| 31 | 0,00333 | A*02:01:01G | C*06:02:01G | B*57:01:01G | DRB1*07:01:01G | DQB1*03:03:02G |
| 32 | 0,00333 | A*02:04     | C*15:02:01G | B*51:01:01G | DRB1*04:11:01  | DQB1*04:02:01G |
| 33 | 0,00333 | A*02:11:01G | C*04:01:01G | B*48:02:01  | DRB1*04:11:01  | DQB1*03:01:01G |
| 34 | 0,00333 | A*02:11:01G | C*04:01:01G | B*48:02:01  | DRB1*09:01:02G | DQB1*03:03:02G |
| 35 | 0,00333 | A*03:01:01G | C*08:02:01G | B*14:02:01G | DRB1*13:02:01G | DQB1*06:09:01G |
| 36 | 0,00333 | A*03:01:01G | C*02:02:02G | B*51:01:01G | DRB1*11:01:01G | DQB1*03:01:01G |
| 37 | 0,00333 | A*11:01:01G | C*04:01:01G | B*35:01:01G | DRB1*01:03     | DQB1*05:01:01G |
| 38 | 0,00333 | A*24:02:01G | C*07:02:01G | B*39:03     | DRB1*04:04:01  | DQB1*03:02:01G |
| 39 | 0,00333 | A*24:02:01G | C*06:02:01G | B*50:01:01G | DRB1*07:01:01G | DQB1*02:01:01G |
| 40 | 0,00333 | A*25:01:01G | C*12:03:01G | B*18:01:01G | DRB1*15:01:01G | DQB1*06:02:01G |
| 41 | 0,00333 | A*26:01:01G | C*12:03:01G | B*38:01:01  | DRB1*13:01:01G | DQB1*06:03:01G |
| 42 | 0,00333 | A*31:01:02G | C*03:03:01G | B*15:04:01G | DRB1*16:02:01G | DQB1*03:01:01G |
| 43 | 0,00333 | A*31:01:02G | C*04:01:01G | B*35:01:01G | DRB1*01:01:01G | DQB1*05:01:01G |
| 44 | 0,00333 | A*31:01:02G | C*04:01:01G | B*35:04:01  | DRB1*08:07     | DQB1*04:02:01G |
| 45 | 0,00333 | A*31:01:02G | C*04:01:01G | B*35:20:01  | DRB1*16:02:01G | DQB1*03:01:01G |
| 46 | 0,00333 | A*31:01:02G | C*07:02:01G | B*39:03     | DRB1*04:04:01  | DQB1*03:02:01G |
| 47 | 0,00333 | A*31:01:02G | C*03:04:01G | B*40:01:01G | DRB1*04:04:01  | DQB1*03:02:01G |
| 48 | 0,00333 | A*33:01:01G | C*08:02:01G | B*14:02:01G | DRB1*07:01:01G | DQB1*02:01:01G |
| 49 | 0,00333 | A*68:01:02G | C*04:01:01G | B*35:05:01  | DRB1*09:01:02G | DQB1*03:03:02G |
| 50 | 0,00229 | A*02:01:01G | C*05:01:01G | B*44:02:01G | DRB1*07:01:01G | DQB1*02:01:01G |
| 51 | 0,00222 | A*01:01:01G | C*07:01:01G | B*08:01:01G | DRB1*08:01:01G | DQB1*04:02:01G |

|    |         |             |             |             |                |                |
|----|---------|-------------|-------------|-------------|----------------|----------------|
| 52 | 0,00222 | A*01:01:01G | C*07:01:01G | B*15:17:01G | DRB1*11:01:01G | DQB1*03:01:01G |
| 53 | 0,00222 | A*01:01:01G | C*05:01:01G | B*18:01:01G | DRB1*07:01:01G | DQB1*02:01:01G |
| 54 | 0,00222 | A*01:01:01G | C*06:02:01G | B*37:01:01G | DRB1*10:01:01G | DQB1*05:01:01G |
| 55 | 0,00222 | A*01:01:01G | C*06:02:01G | B*50:01:01G | DRB1*07:01:01G | DQB1*02:01:01G |
| 56 | 0,00222 | A*01:01:01G | C*16:01:01G | B*51:01:01G | DRB1*13:02:01G | DQB1*06:04:01G |
| 57 | 0,00222 | A*01:01:01G | C*06:02:01G | B*57:01:01G | DRB1*07:01:01G | DQB1*02:01:01G |
| 58 | 0,00222 | A*01:01:01G | C*06:02:01G | B*57:01:01G | DRB1*11:01:01G | DQB1*03:01:01G |
| 59 | 0,00222 | A*01:01:01G | C*07:01:01G | B*57:01:01G | DRB1*07:01:01G | DQB1*03:03:02G |
| 60 | 0,00222 | A*02:01:01G | C*07:02:01G | B*07:02:01G | DRB1*08:02:01  | DQB1*03:02:01G |
| 61 | 0,00222 | A*02:01:01G | C*07:02:01G | B*07:02:01G | DRB1*12:01:01G | DQB1*03:01:01G |
| 62 | 0,00222 | A*02:01:01G | C*07:01:01G | B*08:01:01G | DRB1*14:01:01G | DQB1*05:03:01G |
| 63 | 0,00222 | A*02:01:01G | C*08:02:01G | B*14:02:01G | DRB1*08:02:01  | DQB1*04:02:01G |
| 64 | 0,00222 | A*02:01:01G | C*05:01:01G | B*18:01:01G | DRB1*03:01:01G | DQB1*02:01:01G |
| 65 | 0,00222 | A*02:01:01G | C*07:01:01G | B*18:01:01G | DRB1*13:01:01G | DQB1*06:03:01G |
| 66 | 0,00222 | A*02:01:01G | C*02:02:02G | B*27:05:02G | DRB1*07:01:01G | DQB1*03:03:02G |
| 67 | 0,00222 | A*02:01:01G | C*04:01:01G | B*35:01:01G | DRB1*16:01:01  | DQB1*05:02:01G |
| 68 | 0,00222 | A*02:01:01G | C*04:01:01G | B*35:04:01  | DRB1*14:02:01  | DQB1*03:01:01G |
| 69 | 0,00222 | A*02:01:01G | C*04:01:01G | B*35:05:01  | DRB1*04:04:01  | DQB1*03:02:01G |
| 70 | 0,00222 | A*02:01:01G | C*04:01:01G | B*35:09:01  | DRB1*04:03:01  | DQB1*03:02:01G |
| 71 | 0,00222 | A*02:01:01G | C*04:01:01G | B*35:09:01  | DRB1*08:02:01  | DQB1*03:02:01G |
| 72 | 0,00222 | A*02:01:01G | C*07:02:01G | B*39:05:01  | DRB1*04:04:01  | DQB1*03:02:01G |
| 73 | 0,00222 | A*02:01:01G | C*07:02:01G | B*39:05:01  | DRB1*04:07:03  | DQB1*03:02:01G |
| 74 | 0,00222 | A*02:01:01G | C*02:02:02G | B*40:02:01G | DRB1*11:01:01G | DQB1*03:01:01G |
| 75 | 0,00222 | A*02:01:01G | C*03:04:01G | B*40:04     | DRB1*04:11:01  | DQB1*03:02:01G |
| 76 | 0,00222 | A*02:01:01G | C*17:01:01G | B*41:02:01G | DRB1*13:03:01  | DQB1*03:01:01G |
| 77 | 0,00222 | A*02:01:01G | C*05:01:01G | B*44:02:01G | DRB1*04:01:01G | DQB1*03:01:01G |
| 78 | 0,00222 | A*02:01:01G | C*04:01:01G | B*44:03:01G | DRB1*07:01:01G | DQB1*02:01:01G |

|     |         |             |             |             |                |                |
|-----|---------|-------------|-------------|-------------|----------------|----------------|
| 79  | 0,00222 | A*02:01:01G | C*02:02:02G | B*51:01:01G | DRB1*03:01:01G | DQB1*02:01:01G |
| 80  | 0,00222 | A*02:01:01G | C*03:03:01G | B*51:01:01G | DRB1*04:01:01G | DQB1*03:02:01G |
| 81  | 0,00222 | A*02:01:01G | C*14:02:01G | B*51:01:01G | DRB1*01:01:01G | DQB1*05:01:01G |
| 82  | 0,00222 | A*02:01:01G | C*14:02:01G | B*51:01:01G | DRB1*16:01:01  | DQB1*05:02:01G |
| 83  | 0,00222 | A*02:01:01G | C*15:02:01G | B*51:01:01G | DRB1*07:01:01G | DQB1*02:01:01G |
| 84  | 0,00222 | A*02:02:01G | C*17:01:01G | B*41:01:01  | DRB1*04:05:01  | DQB1*02:01:01G |
| 85  | 0,00222 | A*02:05:01G | C*07:02:01G | B*07:02:01G | DRB1*13:01:01G | DQB1*06:03:01G |
| 86  | 0,00222 | A*02:05:01G | C*06:02:01G | B*50:01:01G | DRB1*09:01:02G | DQB1*03:03:02G |
| 87  | 0,00222 | A*02:11:01G | C*03:04:01G | B*15:01:01G | DRB1*08:04:01  | DQB1*04:02:01G |
| 88  | 0,00222 | A*02:33     | C*04:01:01G | B*35:21     | DRB1*16:02:01G | DQB1*03:01:01G |
| 89  | 0,00222 | A*03:01:01G | C*07:02:01G | B*07:02:01G | DRB1*08:01:01G | DQB1*04:02:01G |
| 90  | 0,00222 | A*03:01:01G | C*12:03:01G | B*18:01:01G | DRB1*04:03:01  | DQB1*03:02:01G |
| 91  | 0,00222 | A*03:01:01G | C*01:02:01G | B*27:05:02G | DRB1*01:01:01G | DQB1*05:01:01G |
| 92  | 0,00222 | A*03:01:01G | C*03:03:01G | B*51:01:01G | DRB1*09:01:02G | DQB1*03:03:02G |
| 93  | 0,00222 | A*03:01:01G | C*12:02:01G | B*52:01:01G | DRB1*15:02:01G | DQB1*06:01:01G |
| 94  | 0,00222 | A*03:01:01G | C*04:01:01G | B*53:01:01G | DRB1*07:01:01G | DQB1*02:01:01G |
| 95  | 0,00222 | A*11:01:01G | C*07:01:01G | B*08:01:01G | DRB1*03:01:01G | DQB1*02:01:01G |
| 96  | 0,00222 | A*11:01:01G | C*15:02:01G | B*51:01:01G | DRB1*15:01:01G | DQB1*06:02:01G |
| 97  | 0,00222 | A*23:01:01G | C*06:02:01G | B*45:01:01G | DRB1*11:01:01G | DQB1*03:01:01G |
| 98  | 0,00222 | A*24:02:01G | C*06:02:01G | B*13:02:01G | DRB1*13:03:01  | DQB1*03:01:01G |
| 99  | 0,00222 | A*24:02:01G | C*03:03:01G | B*15:01:01G | DRB1*11:03:01  | DQB1*03:01:01G |
| 100 | 0,00222 | A*24:02:01G | C*12:03:01G | B*18:01:01G | DRB1*03:01:01G | DQB1*02:01:01G |
| 101 | 0,00222 | A*24:02:01G | C*04:01:01G | B*35:05:01  | DRB1*04:04:01  | DQB1*03:02:01G |
| 102 | 0,00222 | A*24:02:01G | C*05:01:01G | B*44:02:01G | DRB1*01:01:01G | DQB1*05:01:01G |
| 103 | 0,00222 | A*24:02:01G | C*16:01:01G | B*44:03:01G | DRB1*11:01:01G | DQB1*03:01:01G |
| 104 | 0,00222 | A*24:02:01G | C*15:02:01G | B*51:01:01G | DRB1*13:01:01G | DQB1*06:03:01G |
| 105 | 0,00222 | A*24:02:01G | C*12:02:01G | B*52:01:01G | DRB1*15:02:01G | DQB1*06:01:01G |

|     |         |             |             |             |                |                |
|-----|---------|-------------|-------------|-------------|----------------|----------------|
| 106 | 0,00222 | A*24:03:01G | C*03:03:01G | B*15:01:01G | DRB1*08:04:01  | DQB1*04:02:01G |
| 107 | 0,00222 | A*25:01:01G | C*07:01:01G | B*58:01:01G | DRB1*13:01:01G | DQB1*06:03:01G |
| 108 | 0,00222 | A*26:01:01G | C*08:02:01G | B*14:01:01  | DRB1*07:01:01G | DQB1*02:01:01G |
| 109 | 0,00222 | A*26:01:01G | C*16:02:01G | B*51:01:01G | DRB1*07:01:01G | DQB1*02:01:01G |
| 110 | 0,00222 | A*29:02:01G | C*04:01:01G | B*35:01:01G | DRB1*01:01:01G | DQB1*05:01:01G |
| 111 | 0,00222 | A*30:02:01G | C*06:02:01G | B*13:02:01G | DRB1*07:01:01G | DQB1*02:01:01G |
| 112 | 0,00222 | A*31:01:02G | C*01:02:01G | B*07:02:01G | DRB1*04:04:01  | DQB1*03:02:01G |
| 113 | 0,00222 | A*31:01:02G | C*03:03:01G | B*15:01:01G | DRB1*08:02:01  | DQB1*04:02:01G |
| 114 | 0,00222 | A*31:01:02G | C*04:01:01G | B*35:08:01  | DRB1*04:03:01  | DQB1*03:02:01G |
| 115 | 0,00222 | A*31:01:02G | C*07:02:01G | B*39:03     | DRB1*13:02:01G | DQB1*06:09:01G |
| 116 | 0,00222 | A*31:01:02G | C*03:04:01G | B*40:02:01G | DRB1*04:07:01G | DQB1*03:02:01G |
| 117 | 0,00222 | A*32:01:01G | C*03:03:01G | B*15:01:01G | DRB1*11:01:01G | DQB1*03:01:01G |
| 118 | 0,00222 | A*68:01:02G | C*03:04:01G | B*40:02:01G | DRB1*09:01:02G | DQB1*03:03:02G |
| 119 | 0,00222 | A*68:01:02G | C*03:04:01G | B*40:04     | DRB1*04:07:01G | DQB1*03:02:01G |
| 120 | 0,00222 | A*68:17     | C*08:01:01G | B*35:19     | DRB1*04:03:01  | DQB1*03:02:01G |
| 121 | 0,00222 | A*68:17     | C*04:01:01G | B*35:21     | DRB1*08:02:01  | DQB1*04:02:01G |
| 122 | 0,00222 | A*68:17     | C*07:02:01G | B*39:14     | DRB1*14:02:01  | DQB1*03:01:01G |
| 123 | 0,00116 | A*01:01:01G | C*04:01:01G | B*35:01:01G | DRB1*01:01:01G | DQB1*05:01:01G |
| 124 | 0,00116 | A*03:01:01G | C*06:02:01G | B*57:01:01G | DRB1*07:01:01G | DQB1*03:03:02G |
| 125 | 0,00111 | A*01:01:01G | C*04:01:01G | B*07:02:01G | DRB1*08:04:01  | DQB1*04:02:01G |
| 126 | 0,00111 | A*01:01:01G | C*15:05:01G | B*07:05:01G | DRB1*15:01:01G | DQB1*06:02:01G |
| 127 | 0,00111 | A*01:01:01G | C*03:02:01G | B*08:01:01G | DRB1*11:02:01  | DQB1*03:01:01G |
| 128 | 0,00111 | A*01:01:01G | C*07:01:01G | B*08:01:01G | DRB1*13:01:01G | DQB1*06:03:01G |
| 129 | 0,00111 | A*01:01:01G | C*07:206    | B*08:01:01G | DRB1*11:01:02  | DQB1*05:02:01G |
| 130 | 0,00111 | A*01:01:01G | C*07:01:01G | B*08:33     | DRB1*15:01:01G | DQB1*02:01:01G |
| 131 | 0,00111 | A*01:01:01G | C*08:02:01G | B*14:01:01  | DRB1*07:01:01G | DQB1*02:01:01G |
| 132 | 0,00111 | A*01:01:01G | C*12:03:01G | B*14:02:01G | DRB1*04:03:01  | DQB1*02:01:01G |

|     |         |             |             |             |                |                |
|-----|---------|-------------|-------------|-------------|----------------|----------------|
| 133 | 0,00111 | A*01:01:01G | C*07:01:01G | B*15:01:01G | DRB1*13:01:01G | DQB1*06:03:01G |
| 134 | 0,00111 | A*01:01:01G | C*03:03:01G | B*15:17:01G | DRB1*04:07:01G | DQB1*03:03:02G |
| 135 | 0,00111 | A*01:01:01G | C*07:01:01G | B*15:17:01G | DRB1*04:07:03  | DQB1*06:04:01G |
| 136 | 0,00111 | A*01:01:01G | C*07:01:01G | B*18:01:01G | DRB1*07:01:01G | DQB1*03:03:02G |
| 137 | 0,00111 | A*01:01:01G | C*12:03:01G | B*18:01:01G | DRB1*03:01:01G | DQB1*02:01:01G |
| 138 | 0,00111 | A*01:01:01G | C*01:02:01G | B*27:05:02G | DRB1*11:01:01G | DQB1*03:01:01G |
| 139 | 0,00111 | A*01:01:01G | C*04:01:01G | B*35:01:01G | DRB1*11:04:01G | DQB1*03:01:01G |
| 140 | 0,00111 | A*01:01:01G | C*07:01:01G | B*35:02:01G | DRB1*11:04:01G | DQB1*03:01:01G |
| 141 | 0,00111 | A*01:01:01G | C*06:02:01G | B*35:05:01  | DRB1*04:04:01  | DQB1*03:02:01G |
| 142 | 0,00111 | A*01:01:01G | C*04:01:01G | B*35:08:01  | DRB1*04:04:01  | DQB1*04:02:01G |
| 143 | 0,00111 | A*01:01:01G | C*04:01:01G | B*35:08:01  | DRB1*16:07     | DQB1*05:02:01G |
| 144 | 0,00111 | A*01:01:01G | C*06:02:01G | B*37:01:01G | DRB1*11:01:01G | DQB1*03:01:01G |
| 145 | 0,00111 | A*01:01:01G | C*06:02:01G | B*37:01:01G | DRB1*11:03:01  | DQB1*03:01:01G |
| 146 | 0,00111 | A*01:01:01G | C*07:02:01G | B*39:06:02  | DRB1*13:02:01G | DQB1*06:04:01G |
| 147 | 0,00111 | A*01:01:01G | C*03:04:01G | B*40:01:01G | DRB1*04:01:01G | DQB1*03:01:01G |
| 148 | 0,00111 | A*01:01:01G | C*03:04:01G | B*40:04     | DRB1*04:11:01  | DQB1*03:02:01G |
| 149 | 0,00111 | A*01:01:01G | C*15:02:01G | B*40:06:01G | DRB1*14:04:01  | DQB1*05:03:01G |
| 150 | 0,00111 | A*01:01:01G | C*03:04:01G | B*40:08     | DRB1*16:02:01G | DQB1*03:01:01G |
| 151 | 0,00111 | A*01:01:01G | C*07:02:01G | B*44:03:01G | DRB1*08:02:01  | DQB1*02:01:01G |
| 152 | 0,00111 | A*01:01:01G | C*16:01:01G | B*44:03:01G | DRB1*15:01:01G | DQB1*06:02:01G |
| 153 | 0,00111 | A*01:01:01G | C*06:02:01G | B*45:01:01G | DRB1*04:01:01G | DQB1*03:01:01G |
| 154 | 0,00111 | A*01:01:01G | C*06:02:01G | B*48:01:01G | DRB1*04:02:01  | DQB1*04:02:01G |
| 155 | 0,00111 | A*01:01:01G | C*07:01:01G | B*49:01:01G | DRB1*01:03     | DQB1*05:01:01G |
| 156 | 0,00111 | A*01:01:01G | C*07:01:01G | B*49:01:01G | DRB1*11:02:01  | DQB1*03:01:01G |
| 157 | 0,00111 | A*01:01:01G | C*07:01:01G | B*49:01:01G | DRB1*11:04:01G | DQB1*03:01:01G |
| 158 | 0,00111 | A*01:01:01G | C*06:02:01G | B*50:01:01G | DRB1*11:01:01G | DQB1*03:01:01G |
| 159 | 0,00111 | A*01:01:01G | C*06:02:01G | B*51:01:01G | DRB1*13:01:01G | DQB1*06:03:01G |

|     |         |             |             |             |                |                |
|-----|---------|-------------|-------------|-------------|----------------|----------------|
| 160 | 0,00111 | A*01:01:01G | C*06:02:01G | B*57:01:01G | DRB1*13:03:01  | DQB1*03:01:01G |
| 161 | 0,00111 | A*01:01:01G | C*07:01:01G | B*58:01:01G | DRB1*07:01:01G | DQB1*02:01:01G |
| 162 | 0,00111 | A*01:104    | C*07:01:01G | B*18:01:01G | DRB1*11:01:01G | DQB1*03:01:01G |
| 163 | 0,00111 | A*02:01:01G | C*07:02:01G | B*07:02:01G | DRB1*01:03     | DQB1*05:01:01G |
| 164 | 0,00111 | A*02:01:01G | C*07:02:01G | B*07:02:01G | DRB1*04:02:01  | DQB1*03:02:01G |
| 165 | 0,00111 | A*02:01:01G | C*07:02:01G | B*07:02:01G | DRB1*08:01:01G | DQB1*02:01:01G |
| 166 | 0,00111 | A*02:01:01G | C*15:02:01G | B*07:02:01G | DRB1*04:01:01G | DQB1*03:01:01G |
| 167 | 0,00111 | A*02:01:01G | C*04:01:01G | B*08:01:01G | DRB1*03:01:01G | DQB1*02:01:01G |
| 168 | 0,00111 | A*02:01:01G | C*06:02:01G | B*08:01:01G | DRB1*01:01:01G | DQB1*05:01:01G |
| 169 | 0,00111 | A*02:01:01G | C*07:01:01G | B*08:01:01G | DRB1*16:01:01  | DQB1*05:02:01G |
| 170 | 0,00111 | A*02:01:01G | C*06:02:01G | B*13:02:01G | DRB1*11:04:01G | DQB1*03:01:01G |
| 171 | 0,00111 | A*02:01:01G | C*16:04:01  | B*13:02:01G | DRB1*10:01:01G | DQB1*05:01:01G |
| 172 | 0,00111 | A*02:01:01G | C*12:03:01G | B*14:01:01  | DRB1*07:01:01G | DQB1*02:01:01G |
| 173 | 0,00111 | A*02:01:01G | C*02:02:02G | B*14:02:01G | DRB1*13:01:01G | DQB1*06:03:01G |
| 174 | 0,00111 | A*02:01:01G | C*08:02:01G | B*14:02:01G | DRB1*01:02:01  | DQB1*03:01:01G |
| 175 | 0,00111 | A*02:01:01G | C*08:02:01G | B*14:02:01G | DRB1*13:03:01  | DQB1*03:01:01G |
| 176 | 0,00111 | A*02:01:01G | C*01:02:01G | B*15:01:01G | DRB1*07:01:01G | DQB1*02:01:01G |
| 177 | 0,00111 | A*02:01:01G | C*03:03:01G | B*15:01:01G | DRB1*07:01:01G | DQB1*02:01:01G |
| 178 | 0,00111 | A*02:01:01G | C*03:03:01G | B*15:01:01G | DRB1*13:01:01G | DQB1*05:01:01G |
| 179 | 0,00111 | A*02:01:01G | C*03:04:01G | B*15:01:01G | DRB1*04:01:01G | DQB1*03:02:01G |
| 180 | 0,00111 | A*02:01:01G | C*04:01:01G | B*15:01:01G | DRB1*08:07     | DQB1*04:02:01G |
| 181 | 0,00111 | A*02:01:01G | C*16:01:01G | B*15:01:01G | DRB1*14:01:01G | DQB1*05:03:01G |
| 182 | 0,00111 | A*02:01:01G | C*01:02:01G | B*15:04:01G | DRB1*09:01:02G | DQB1*03:03:02G |
| 183 | 0,00111 | A*02:01:01G | C*03:04:01G | B*15:04:01G | DRB1*14:02:01  | DQB1*03:01:01G |
| 184 | 0,00111 | A*02:01:01G | C*04:01:01G | B*15:04:01G | DRB1*14:02:01  | DQB1*03:01:01G |
| 185 | 0,00111 | A*02:01:01G | C*07:02:01G | B*15:07:01G | DRB1*03:01:01G | DQB1*02:01:01G |
| 186 | 0,00111 | A*02:01:01G | C*01:02:01G | B*15:09     | DRB1*11:01:01G | DQB1*03:01:01G |



|     |         |             |             |             |                |                |
|-----|---------|-------------|-------------|-------------|----------------|----------------|
| 187 | 0,00111 | A*02:01:01G | C*07:01:01G | B*15:17:01G | DRB1*13:02:01G | DQB1*06:04:01G |
| 188 | 0,00111 | A*02:01:01G | C*05:01:01G | B*18:01:01G | DRB1*11:01:01G | DQB1*03:01:01G |
| 189 | 0,00111 | A*02:01:01G | C*05:01:01G | B*18:01:01G | DRB1*11:02:01  | DQB1*03:02:01G |
| 190 | 0,00111 | A*02:01:01G | C*07:01:01G | B*18:01:01G | DRB1*04:01:01G | DQB1*03:01:01G |
| 191 | 0,00111 | A*02:01:01G | C*07:01:01G | B*18:01:01G | DRB1*04:04:01  | DQB1*03:02:01G |
| 192 | 0,00111 | A*02:01:01G | C*07:01:01G | B*18:01:01G | DRB1*11:01:01G | DQB1*03:01:01G |
| 193 | 0,00111 | A*02:01:01G | C*07:01:01G | B*18:01:01G | DRB1*12:01:01G | DQB1*03:03:02G |
| 194 | 0,00111 | A*02:01:01G | C*12:03:01G | B*18:01:01G | DRB1*11:04:01G | DQB1*03:01:01G |
| 195 | 0,00111 | A*02:01:01G | C*12:03:01G | B*18:01:01G | DRB1*16:01:01  | DQB1*05:02:01G |
| 196 | 0,00111 | A*02:01:01G | C*02:02:02G | B*27:02:01  | DRB1*04:01:01G | DQB1*03:02:01G |
| 197 | 0,00111 | A*02:01:01G | C*02:02:02G | B*27:05:03  | DRB1*04:04:01  | DQB1*03:02:01G |
| 198 | 0,00111 | A*02:01:01G | C*03:04:01G | B*35:01:01G | DRB1*14:02:02  | DQB1*03:02:01G |
| 199 | 0,00111 | A*02:01:01G | C*04:01:01G | B*35:01:01G | DRB1*13:01:01G | DQB1*03:03:02G |
| 200 | 0,00111 | A*02:01:01G | C*04:01:01G | B*35:01:01G | DRB1*13:01:01G | DQB1*06:03:01G |
| 201 | 0,00111 | A*02:01:01G | C*04:01:01G | B*35:01:01G | DRB1*16:02:01G | DQB1*03:01:01G |
| 202 | 0,00111 | A*02:01:01G | C*17:01:01G | B*35:01:01G | DRB1*14:01:01G | DQB1*03:01:01G |
| 203 | 0,00111 | A*02:01:01G | C*03:04:01G | B*35:04:01  | DRB1*14:02:01  | DQB1*03:01:01G |
| 204 | 0,00111 | A*02:01:01G | C*04:01:01G | B*35:04:01  | DRB1*04:07:01G | DQB1*03:02:01G |
| 205 | 0,00111 | A*02:01:01G | C*04:01:01G | B*35:05:01  | DRB1*08:02:01  | DQB1*05:01:01G |
| 206 | 0,00111 | A*02:01:01G | C*04:01:01G | B*35:05:01  | DRB1*16:02:01G | DQB1*03:01:01G |
| 207 | 0,00111 | A*02:01:01G | C*04:01:01G | B*35:08:01  | DRB1*16:01:01  | DQB1*05:02:01G |
| 208 | 0,00111 | A*02:01:01G | C*06:02:01G | B*35:08:01  | DRB1*11:04:01G | DQB1*03:01:01G |
| 209 | 0,00111 | A*02:01:01G | C*08:01:01G | B*38:01:01  | DRB1*04:07:01G | DQB1*03:02:01G |
| 210 | 0,00111 | A*02:01:01G | C*08:02:01G | B*38:01:01  | DRB1*07:01:01G | DQB1*03:02:01G |
| 211 | 0,00111 | A*02:01:01G | C*12:03:01G | B*38:01:01  | DRB1*11:01:01G | DQB1*03:01:01G |
| 212 | 0,00111 | A*02:01:01G | C*12:03:01G | B*38:01:01  | DRB1*13:01:01G | DQB1*06:03:01G |
| 213 | 0,00111 | A*02:01:01G | C*12:03:01G | B*38:01:01  | DRB1*14:01:01G | DQB1*05:03:01G |

|     |         |             |             |             |                |                |
|-----|---------|-------------|-------------|-------------|----------------|----------------|
| 214 | 0,00111 | A*02:01:01G | C*07:02:01G | B*39:01:01G | DRB1*01:03     | DQB1*05:01:01G |
| 215 | 0,00111 | A*02:01:01G | C*12:03:01G | B*39:01:01G | DRB1*03:01:01G | DQB1*02:01:01G |
| 216 | 0,00111 | A*02:01:01G | C*03:04:02  | B*39:05:01  | DRB1*01:02:01  | DQB1*05:01:01G |
| 217 | 0,00111 | A*02:01:01G | C*07:02:01G | B*39:05:01  | DRB1*04:03:01  | DQB1*03:02:01G |
| 218 | 0,00111 | A*02:01:01G | C*12:03:01G | B*39:06:02  | DRB1*16:01:01  | DQB1*06:04:01G |
| 219 | 0,00111 | A*02:01:01G | C*07:02:01G | B*39:09:01  | DRB1*16:02:01G | DQB1*03:01:01G |
| 220 | 0,00111 | A*02:01:01G | C*07:01:01G | B*39:11     | DRB1*14:02:01  | DQB1*03:01:01G |
| 221 | 0,00111 | A*02:01:01G | C*07:02:01G | B*39:13:01  | DRB1*04:04:01  | DQB1*02:01:01G |
| 222 | 0,00111 | A*02:01:01G | C*03:04:01G | B*40:08     | DRB1*14:02:01  | DQB1*05:01:01G |
| 223 | 0,00111 | A*02:01:01G | C*01:02:01G | B*41:01:01  | DRB1*13:02:01G | DQB1*06:04:01G |
| 224 | 0,00111 | A*02:01:01G | C*05:01:01G | B*44:02:01G | DRB1*03:01:01G | DQB1*03:02:01G |
| 225 | 0,00111 | A*02:01:01G | C*05:01:01G | B*44:02:01G | DRB1*04:04:01  | DQB1*03:02:01G |
| 226 | 0,00111 | A*02:01:01G | C*05:01:01G | B*44:02:01G | DRB1*09:01:02G | DQB1*03:03:02G |
| 227 | 0,00111 | A*02:01:01G | C*05:01:01G | B*44:02:01G | DRB1*10:01:01G | DQB1*05:01:01G |
| 228 | 0,00111 | A*02:01:01G | C*05:01:01G | B*44:02:01G | DRB1*15:01:01G | DQB1*06:03:01G |
| 229 | 0,00111 | A*02:01:01G | C*05:09:01  | B*44:02:01G | DRB1*13:01:01G | DQB1*06:03:01G |
| 230 | 0,00111 | A*02:01:01G | C*06:02:01G | B*44:02:01G | DRB1*11:04:01G | DQB1*03:01:01G |
| 231 | 0,00111 | A*02:01:01G | C*06:02:01G | B*44:02:01G | DRB1*14:01:01G | DQB1*05:03:01G |
| 232 | 0,00111 | A*02:01:01G | C*07:04:01G | B*44:02:01G | DRB1*11:01:01G | DQB1*03:01:01G |
| 233 | 0,00111 | A*02:01:01G | C*06:02:01G | B*44:03:01G | DRB1*07:01:01G | DQB1*02:01:01G |
| 234 | 0,00111 | A*02:01:01G | C*15:02:01G | B*44:03:01G | DRB1*04:04:01  | DQB1*03:02:01G |
| 235 | 0,00111 | A*02:01:01G | C*16:01:01G | B*44:03:01G | DRB1*04:03:01  | DQB1*03:04:01  |
| 236 | 0,00111 | A*02:01:01G | C*16:01:01G | B*44:03:01G | DRB1*07:01:01G | DQB1*02:01:01G |
| 237 | 0,00111 | A*02:01:01G | C*04:01:01G | B*48:01:01G | DRB1*08:02:01  | DQB1*03:02:01G |
| 238 | 0,00111 | A*02:01:01G | C*08:01:01G | B*48:01:01G | DRB1*04:05:04  | DQB1*06:02:01G |
| 239 | 0,00111 | A*02:01:01G | C*08:01:01G | B*48:01:01G | DRB1*14:02:01  | DQB1*03:01:01G |
| 240 | 0,00111 | A*02:01:01G | C*07:01:01G | B*49:01:01G | DRB1*04:05:01  | DQB1*03:01:01G |

|     |         |             |             |             |                |                |
|-----|---------|-------------|-------------|-------------|----------------|----------------|
| 241 | 0,00111 | A*02:01:01G | C*07:01:01G | B*49:01:01G | DRB1*07:01:01G | DQB1*04:02:03  |
| 242 | 0,00111 | A*02:01:01G | C*07:02:01G | B*49:01:01G | DRB1*13:02:01G | DQB1*06:04:01G |
| 243 | 0,00111 | A*02:01:01G | C*06:02:01G | B*50:01:01G | DRB1*07:01:01G | DQB1*02:01:01G |
| 244 | 0,00111 | A*02:01:01G | C*02:02:02G | B*51:01:01G | DRB1*08:01:01G | DQB1*04:02:01G |
| 245 | 0,00111 | A*02:01:01G | C*02:02:02G | B*51:01:01G | DRB1*11:01:01G | DQB1*03:01:01G |
| 246 | 0,00111 | A*02:01:01G | C*03:03:01G | B*51:01:01G | DRB1*09:01:02G | DQB1*03:02:01G |
| 247 | 0,00111 | A*02:01:01G | C*04:01:01G | B*51:01:01G | DRB1*01:02:01  | DQB1*03:02:01G |
| 248 | 0,00111 | A*02:01:01G | C*07:01:01G | B*51:01:01G | DRB1*13:01:01G | DQB1*06:03:01G |
| 249 | 0,00111 | A*02:01:01G | C*07:01:01G | B*51:01:01G | DRB1*13:03:01  | DQB1*02:01:01G |
| 250 | 0,00111 | A*02:01:01G | C*07:04:01G | B*51:01:01G | DRB1*11:01:01G | DQB1*03:01:01G |
| 251 | 0,00111 | A*02:01:01G | C*14:02:01G | B*51:01:01G | DRB1*01:03     | DQB1*05:01:01G |
| 252 | 0,00111 | A*02:01:01G | C*14:02:01G | B*51:01:01G | DRB1*08:01:01G | DQB1*04:02:01G |
| 253 | 0,00111 | A*02:01:01G | C*14:02:01G | B*51:01:01G | DRB1*14:01:01G | DQB1*05:03:01G |
| 254 | 0,00111 | A*02:01:01G | C*14:03     | B*51:01:01G | DRB1*11:01:02  | DQB1*06:02:01G |
| 255 | 0,00111 | A*02:01:01G | C*15:02:01G | B*51:01:01G | DRB1*03:01:01G | DQB1*02:01:01G |
| 256 | 0,00111 | A*02:01:01G | C*16:02:01G | B*51:01:01G | DRB1*11:04:01G | DQB1*03:01:01G |
| 257 | 0,00111 | A*02:01:01G | C*12:03:01G | B*51:04     | DRB1*14:01:01G | DQB1*04:02:01G |
| 258 | 0,00111 | A*02:01:01G | C*16:02:01G | B*52:01:02  | DRB1*04:11:01  | DQB1*03:01:01G |
| 259 | 0,00111 | A*02:01:01G | C*04:01:01G | B*53:01:01G | DRB1*03:01:01G | DQB1*02:01:01G |
| 260 | 0,00111 | A*02:01:01G | C*04:01:01G | B*53:01:01G | DRB1*13:02:01G | DQB1*06:04:01G |
| 261 | 0,00111 | A*02:01:01G | C*02:02:02G | B*55:01:01G | DRB1*04:04:01  | DQB1*06:02:01G |
| 262 | 0,00111 | A*02:01:01G | C*03:03:01G | B*55:01:01G | DRB1*14:01:01G | DQB1*05:03:01G |
| 263 | 0,00111 | A*02:01:01G | C*01:02:01G | B*56:01:01G | DRB1*03:01:01G | DQB1*06:02:01G |
| 264 | 0,00111 | A*02:01:01G | C*06:02:01G | B*57:01:01G | DRB1*04:03:01  | DQB1*03:02:01G |
| 265 | 0,00111 | A*02:01:01G | C*08:01:01G | B*57:01:01G | DRB1*08:02:01  | DQB1*03:02:01G |
| 266 | 0,00111 | A*02:01:01G | C*07:01:01G | B*57:03:01G | DRB1*11:03:01  | DQB1*03:02:01G |
| 267 | 0,00111 | A*02:01:01G | C*07:01:01G | B*57:03:01G | DRB1*13:02:01G | DQB1*06:04:01G |

|     |         |             |             |             |                |                |
|-----|---------|-------------|-------------|-------------|----------------|----------------|
| 268 | 0,00111 | A*02:01:01G | C*02:02:02G | B*58:01:01G | DRB1*07:01:01G | DQB1*03:01:01G |
| 269 | 0,00111 | A*02:01:01G | C*03:02:01G | B*58:01:01G | DRB1*04:05:01  | DQB1*02:01:01G |
| 270 | 0,00111 | A*02:01:01G | C*07:01:01G | B*58:01:01G | DRB1*04:03:01  | DQB1*03:05:01G |
| 271 | 0,00111 | A*02:01:01G | C*07:01:01G | B*58:01:01G | DRB1*11:03:01  | DQB1*03:01:01G |
| 272 | 0,00111 | A*02:02:01G | C*06:02:01G | B*15:08:01  | DRB1*08:07     | DQB1*03:01:01G |
| 273 | 0,00111 | A*02:02:01G | C*07:02:01G | B*41:01:01  | DRB1*11:04:01G | DQB1*03:02:01G |
| 274 | 0,00111 | A*02:02:01G | C*17:01:01G | B*41:01:01  | DRB1*03:01:01G | DQB1*02:01:01G |
| 275 | 0,00111 | A*02:04     | C*15:02:01G | B*51:01:01G | DRB1*15:01:01G | DQB1*03:01:01G |
| 276 | 0,00111 | A*02:05:01G | C*06:02:01G | B*15:20     | DRB1*13:01:01G | DQB1*06:03:01G |
| 277 | 0,00111 | A*02:05:01G | C*04:01:01G | B*35:01:01G | DRB1*14:01:01G | DQB1*05:03:01G |
| 278 | 0,00111 | A*02:05:01G | C*06:02:01G | B*50:01:01G | DRB1*15:01:01G | DQB1*06:02:01G |
| 279 | 0,00111 | A*02:05:01G | C*03:03:01G | B*51:01:01G | DRB1*16:02:01G | DQB1*03:01:01G |
| 280 | 0,00111 | A*02:05:01G | C*07:01:01G | B*55:01:01G | DRB1*07:01:01G | DQB1*03:01:01G |
| 281 | 0,00111 | A*02:05:01G | C*07:01:01G | B*58:01:01G | DRB1*04:01:01G | DQB1*03:02:01G |
| 282 | 0,00111 | A*02:06:01G | C*04:01:01G | B*35:05:01  | DRB1*14:01:01G | DQB1*03:01:01G |
| 283 | 0,00111 | A*02:06:01G | C*05:01:01G | B*44:02:01G | DRB1*12:01:01G | DQB1*03:01:01G |
| 284 | 0,00111 | A*02:06:01G | C*08:03:01G | B*48:01:01G | DRB1*04:03:01  | DQB1*03:04:01  |
| 285 | 0,00111 | A*02:06:01G | C*15:02:01G | B*51:01:01G | DRB1*14:01:01G | DQB1*05:03:01G |
| 286 | 0,00111 | A*02:11:01G | C*12:03:01G | B*39:01:01G | DRB1*13:01:01G | DQB1*06:03:01G |
| 287 | 0,00111 | A*02:11:01G | C*03:04:01G | B*40:04     | DRB1*14:02:01  | DQB1*03:01:01G |
| 288 | 0,00111 | A*02:11:01G | C*04:01:01G | B*48:02:01  | DRB1*04:07:01G | DQB1*03:02:01G |
| 289 | 0,00111 | A*02:11:01G | C*04:01:01G | B*48:02:01  | DRB1*16:02:01G | DQB1*03:01:01G |
| 290 | 0,00111 | A*02:13     | C*15:02:01G | B*51:01:01G | DRB1*04:07:01G | DQB1*03:02:01G |
| 291 | 0,00111 | A*02:22:01G | C*07:02:01G | B*08:01:01G | DRB1*01:02:01  | DQB1*04:02:01G |
| 292 | 0,00111 | A*03:01:01G | C*07:02:01G | B*07:02:01G | DRB1*04:02:01  | DQB1*03:02:01G |
| 293 | 0,00111 | A*03:01:01G | C*07:02:01G | B*07:02:01G | DRB1*13:02:01G | DQB1*05:02:01G |
| 294 | 0,00111 | A*03:01:01G | C*07:02:01G | B*07:02:01G | DRB1*14:01:01G | DQB1*05:03:01G |

|     |         |             |             |             |                |                |
|-----|---------|-------------|-------------|-------------|----------------|----------------|
| 295 | 0,00111 | A*03:01:01G | C*07:02:01G | B*08:01:01G | DRB1*04:03:01  | DQB1*03:02:01G |
| 296 | 0,00111 | A*03:01:01G | C*03:04:01G | B*14:01:01  | DRB1*04:01:01G | DQB1*05:01:01G |
| 297 | 0,00111 | A*03:01:01G | C*08:02:01G | B*14:01:01  | DRB1*04:05:01  | DQB1*02:01:01G |
| 298 | 0,00111 | A*03:01:01G | C*15:05:01G | B*14:02:01G | DRB1*01:02:01  | DQB1*05:01:01G |
| 299 | 0,00111 | A*03:01:01G | C*16:04:01  | B*14:02:01G | DRB1*04:02:01  | DQB1*05:01:01G |
| 300 | 0,00111 | A*03:01:01G | C*03:03:01G | B*15:01:01G | DRB1*11:03:01  | DQB1*03:01:01G |
| 301 | 0,00111 | A*03:01:01G | C*07:02:01G | B*15:01:01G | DRB1*12:01:01G | DQB1*03:01:01G |
| 302 | 0,00111 | A*03:01:01G | C*07:04:01G | B*15:01:01G | DRB1*04:02:01  | DQB1*06:03:01G |
| 303 | 0,00111 | A*03:01:01G | C*07:04:01G | B*15:18:01G | DRB1*13:01:01G | DQB1*06:03:01G |
| 304 | 0,00111 | A*03:01:01G | C*03:04:01G | B*18:01:01G | DRB1*11:01:01G | DQB1*03:01:01G |
| 305 | 0,00111 | A*03:01:01G | C*07:01:01G | B*18:01:01G | DRB1*11:04:01G | DQB1*03:01:01G |
| 306 | 0,00111 | A*03:01:01G | C*04:01:01G | B*35:01:01G | DRB1*11:01:01G | DQB1*03:01:01G |
| 307 | 0,00111 | A*03:01:01G | C*04:01:01G | B*35:01:01G | DRB1*13:01:01G | DQB1*06:03:01G |
| 308 | 0,00111 | A*03:01:01G | C*04:01:01G | B*35:01:01G | DRB1*13:05:01  | DQB1*03:01:01G |
| 309 | 0,00111 | A*03:01:01G | C*08:02:01G | B*35:01:01G | DRB1*01:02:01  | DQB1*05:01:01G |
| 310 | 0,00111 | A*03:01:01G | C*03:04:01G | B*35:03:01G | DRB1*15:01:01G | DQB1*05:02:01G |
| 311 | 0,00111 | A*03:01:01G | C*12:03:01G | B*35:03:01G | DRB1*14:01:01G | DQB1*05:03:01G |
| 312 | 0,00111 | A*03:01:01G | C*15:03     | B*35:03:01G | DRB1*08:04:01  | DQB1*05:03:01G |
| 313 | 0,00111 | A*03:01:01G | C*04:01:01G | B*35:04:01  | DRB1*01:02:01  | DQB1*05:01:01G |
| 314 | 0,00111 | A*03:01:01G | C*12:03:01G | B*38:01:01  | DRB1*11:04:01G | DQB1*03:01:01G |
| 315 | 0,00111 | A*03:01:01G | C*07:01:01G | B*40:01:01G | DRB1*03:01:01G | DQB1*02:01:01G |
| 316 | 0,00111 | A*03:01:01G | C*08:02:01G | B*40:01:01G | DRB1*01:01:01G | DQB1*03:01:01G |
| 317 | 0,00111 | A*03:01:01G | C*12:03:01G | B*40:01:01G | DRB1*13:01:01G | DQB1*06:03:01G |
| 318 | 0,00111 | A*03:01:01G | C*02:02:02G | B*44:02:01G | DRB1*08:03:02  | DQB1*03:01:01G |
| 319 | 0,00111 | A*03:01:01G | C*07:04:01G | B*44:02:01G | DRB1*13:02:01G | DQB1*06:04:01G |
| 320 | 0,00111 | A*03:01:01G | C*07:01:01G | B*44:03:01G | DRB1*07:01:01G | DQB1*03:03:02G |
| 321 | 0,00111 | A*03:01:01G | C*02:02:02G | B*44:05:01  | DRB1*15:01:01G | DQB1*03:01:01G |

|     |         |             |             |             |                |                |
|-----|---------|-------------|-------------|-------------|----------------|----------------|
| 322 | 0,00111 | A*03:01:01G | C*16:01:01G | B*45:01:01G | DRB1*13:02:01G | DQB1*06:04:01G |
| 323 | 0,00111 | A*03:01:01G | C*07:01:01G | B*47:01:01G | DRB1*13:01:01G | DQB1*03:01:01G |
| 324 | 0,00111 | A*03:01:01G | C*12:03:01G | B*47:01:01G | DRB1*04:05:01  | DQB1*03:02:01G |
| 325 | 0,00111 | A*03:01:01G | C*08:01:01G | B*48:01:01G | DRB1*09:01:02G | DQB1*03:01:01G |
| 326 | 0,00111 | A*03:01:01G | C*07:01:01G | B*49:01:01G | DRB1*03:01:01G | DQB1*02:01:01G |
| 327 | 0,00111 | A*03:01:01G | C*04:01:01G | B*51:01:01G | DRB1*01:01:01G | DQB1*06:03:01G |
| 328 | 0,00111 | A*03:01:01G | C*04:01:01G | B*51:01:01G | DRB1*04:07:01G | DQB1*04:02:01G |
| 329 | 0,00111 | A*03:01:01G | C*14:02:01G | B*51:01:01G | DRB1*07:01:01G | DQB1*02:01:01G |
| 330 | 0,00111 | A*03:01:01G | C*15:02:01G | B*51:01:01G | DRB1*14:01:01G | DQB1*05:03:01G |
| 331 | 0,00111 | A*03:01:01G | C*15:02:01G | B*52:01:02  | DRB1*04:07:01G | DQB1*05:01:01G |
| 332 | 0,00111 | A*03:01:01G | C*03:03:01G | B*55:01:01G | DRB1*14:01:01G | DQB1*05:02:01G |
| 333 | 0,00111 | A*03:02:01G | C*08:02:01G | B*44:02:01G | DRB1*10:01:01G | DQB1*03:02:01G |
| 334 | 0,00111 | A*03:02:01G | C*04:01:01G | B*51:01:01G | DRB1*04:02:01  | DQB1*03:02:01G |
| 335 | 0,00111 | A*03:02:01G | C*15:02:01G | B*51:01:01G | DRB1*11:01:01G | DQB1*03:01:01G |
| 336 | 0,00111 | A*03:08     | C*07:02:01G | B*08:01:01G | DRB1*11:01:01G | DQB1*03:01:01G |
| 337 | 0,00111 | A*11:01:01G | C*06:02:01G | B*13:02:01G | DRB1*13:01:01G | DQB1*06:03:01G |
| 338 | 0,00111 | A*11:01:01G | C*08:02:01G | B*14:01:01  | DRB1*01:03     | DQB1*05:01:01G |
| 339 | 0,00111 | A*11:01:01G | C*08:02:01G | B*14:01:01  | DRB1*07:01:01G | DQB1*02:01:01G |
| 340 | 0,00111 | A*11:01:01G | C*08:02:01G | B*14:02:01G | DRB1*01:02:01  | DQB1*05:01:01G |
| 341 | 0,00111 | A*11:01:01G | C*02:02:02G | B*15:01:01G | DRB1*04:01:01G | DQB1*03:04:01  |
| 342 | 0,00111 | A*11:01:01G | C*12:03:01G | B*18:01:01G | DRB1*15:01:01G | DQB1*06:02:01G |
| 343 | 0,00111 | A*11:01:01G | C*07:01:01G | B*18:03     | DRB1*11:04:01G | DQB1*03:01:01G |
| 344 | 0,00111 | A*11:01:01G | C*02:02:02G | B*27:05:02G | DRB1*09:01:02G | DQB1*03:03:02G |
| 345 | 0,00111 | A*11:01:01G | C*02:02:02G | B*27:05:02G | DRB1*14:01:01G | DQB1*05:03:01G |
| 346 | 0,00111 | A*11:01:01G | C*04:01:01G | B*35:01:01G | DRB1*01:01:01G | DQB1*05:01:01G |
| 347 | 0,00111 | A*11:01:01G | C*04:01:01G | B*35:01:01G | DRB1*13:01:01G | DQB1*06:03:01G |
| 348 | 0,00111 | A*11:01:01G | C*04:01:01G | B*35:01:01G | DRB1*16:01:01  | DQB1*03:02:01G |

|     |         |             |             |             |                |                |
|-----|---------|-------------|-------------|-------------|----------------|----------------|
| 349 | 0,00111 | A*11:01:01G | C*14:02:01G | B*35:01:01G | DRB1*08:01:01G | DQB1*03:01:01G |
| 350 | 0,00111 | A*11:01:01G | C*04:01:01G | B*35:03:01G | DRB1*04:01:01G | DQB1*03:01:01G |
| 351 | 0,00111 | A*11:01:01G | C*04:01:01G | B*38:01:01  | DRB1*07:01:01G | DQB1*05:02:01G |
| 352 | 0,00111 | A*11:01:01G | C*06:02:01G | B*38:01:01  | DRB1*13:01:01G | DQB1*06:03:01G |
| 353 | 0,00111 | A*11:01:01G | C*12:03:01G | B*38:01:01  | DRB1*13:01:01G | DQB1*06:03:01G |
| 354 | 0,00111 | A*11:01:01G | C*07:02:01G | B*39:05:01  | DRB1*04:04:01  | DQB1*03:02:01G |
| 355 | 0,00111 | A*11:01:01G | C*07:02:01G | B*39:09:01  | DRB1*13:01:01G | DQB1*06:03:01G |
| 356 | 0,00111 | A*11:01:01G | C*03:04:01G | B*40:01:01G | DRB1*01:01:01G | DQB1*03:02:01G |
| 357 | 0,00111 | A*11:01:01G | C*04:01:01G | B*41:01:01  | DRB1*11:02:01  | DQB1*05:03:01G |
| 358 | 0,00111 | A*11:01:01G | C*05:01:01G | B*44:02:01G | DRB1*07:01:01G | DQB1*05:03:01G |
| 359 | 0,00111 | A*11:01:01G | C*02:02:02G | B*44:03:01G | DRB1*09:01:02G | DQB1*03:03:02G |
| 360 | 0,00111 | A*11:01:01G | C*06:02:01G | B*44:03:01G | DRB1*03:01:01G | DQB1*02:01:01G |
| 361 | 0,00111 | A*11:01:01G | C*16:01:01G | B*44:03:01G | DRB1*11:01:01G | DQB1*03:01:01G |
| 362 | 0,00111 | A*11:01:01G | C*04:01:01G | B*44:03:02G | DRB1*04:01:01G | DQB1*05:03:01G |
| 363 | 0,00111 | A*11:01:01G | C*07:01:01G | B*49:01:01G | DRB1*14:02:01  | DQB1*03:01:01G |
| 364 | 0,00111 | A*11:01:01G | C*07:01:01G | B*49:01:01G | DRB1*15:01:01G | DQB1*02:01:01G |
| 365 | 0,00111 | A*11:01:01G | C*16:01:01G | B*50:01:01G | DRB1*07:01:01G | DQB1*02:01:01G |
| 366 | 0,00111 | A*11:01:01G | C*06:02:01G | B*50:02     | DRB1*04:06:01G | DQB1*04:02:01G |
| 367 | 0,00111 | A*11:01:01G | C*03:03:01G | B*51:01:01G | DRB1*15:01:01G | DQB1*03:02:01G |
| 368 | 0,00111 | A*11:01:01G | C*12:02:01G | B*51:01:01G | DRB1*15:02:01G | DQB1*06:01:01G |
| 369 | 0,00111 | A*11:01:01G | C*15:02:01G | B*51:01:01G | DRB1*04:02:01  | DQB1*03:02:01G |
| 370 | 0,00111 | A*11:01:01G | C*15:02:01G | B*51:01:01G | DRB1*08:02:01  | DQB1*04:02:01G |
| 371 | 0,00111 | A*11:01:01G | C*15:02:01G | B*51:01:01G | DRB1*11:02:01  | DQB1*03:01:01G |
| 372 | 0,00111 | A*11:01:01G | C*15:02:01G | B*52:01:02  | DRB1*14:02:01  | DQB1*06:02:01G |
| 373 | 0,00111 | A*11:01:01G | C*03:03:01G | B*55:01:01G | DRB1*04:04:01  | DQB1*05:01:01G |
| 374 | 0,00111 | A*11:01:01G | C*12:03:01G | B*58:01:01G | DRB1*08:02:01  | DQB1*04:02:01G |
| 375 | 0,00111 | A*23:01:01G | C*06:02:01G | B*07:02:01G | DRB1*04:08:01  | DQB1*05:01:01G |

|     |         |             |             |             |                |                |
|-----|---------|-------------|-------------|-------------|----------------|----------------|
| 376 | 0,00111 | A*23:01:01G | C*07:02:01G | B*07:02:01G | DRB1*04:05:01  | DQB1*03:02:01G |
| 377 | 0,00111 | A*23:01:01G | C*02:10:01G | B*15:03:01G | DRB1*11:01:02  | DQB1*03:01:01G |
| 378 | 0,00111 | A*23:01:01G | C*07:01:01G | B*15:27:02  | DRB1*04:07:01G | DQB1*03:01:01G |
| 379 | 0,00111 | A*23:01:01G | C*02:02:02G | B*41:01:01  | DRB1*13:02:01G | DQB1*06:04:01G |
| 380 | 0,00111 | A*23:01:01G | C*05:01:01G | B*44:02:01G | DRB1*13:02:01G | DQB1*06:09:01G |
| 381 | 0,00111 | A*23:01:01G | C*04:01:01G | B*44:03:01G | DRB1*03:01:01G | DQB1*02:01:01G |
| 382 | 0,00111 | A*23:01:01G | C*04:01:01G | B*44:03:01G | DRB1*13:01:01G | DQB1*06:03:01G |
| 383 | 0,00111 | A*23:01:01G | C*04:01:01G | B*44:03:01G | DRB1*15:01:01G | DQB1*06:02:01G |
| 384 | 0,00111 | A*23:01:01G | C*12:03:01G | B*44:03:01G | DRB1*16:01:01  | DQB1*02:01:01G |
| 385 | 0,00111 | A*23:01:01G | C*15:05:01G | B*45:01:01G | DRB1*01:02:01  | DQB1*03:01:01G |
| 386 | 0,00111 | A*23:01:01G | C*04:01:01G | B*53:01:01G | DRB1*08:02:01  | DQB1*03:01:01G |
| 387 | 0,00111 | A*23:01:01G | C*03:03:01G | B*55:01:01G | DRB1*04:03:01  | DQB1*03:02:01G |
| 388 | 0,00111 | A*23:01:01G | C*04:01:01G | B*56:01:01G | DRB1*15:03:01G | DQB1*05:01:01G |
| 389 | 0,00111 | A*23:01:01G | C*07:01:01G | B*57:01:01G | DRB1*07:01:01G | DQB1*06:02:01G |
| 390 | 0,00111 | A*23:01:01G | C*07:01:01G | B*57:01:01G | DRB1*11:04:01G | DQB1*03:01:01G |
| 391 | 0,00111 | A*23:01:01G | C*07:01:01G | B*58:01:01G | DRB1*04:02:01  | DQB1*03:01:01G |
| 392 | 0,00111 | A*23:01:01G | C*07:01:01G | B*58:01:01G | DRB1*13:01:01G | DQB1*03:03:02G |
| 393 | 0,00111 | A*24:02:01G | C*07:02:01G | B*07:02:01G | DRB1*07:01:01G | DQB1*06:02:01G |
| 394 | 0,00111 | A*24:02:01G | C*15:05:01G | B*07:05:01G | DRB1*16:01:01  | DQB1*02:01:01G |
| 395 | 0,00111 | A*24:02:01G | C*02:02:02G | B*14:02:01G | DRB1*01:02:01  | DQB1*03:01:01G |
| 396 | 0,00111 | A*24:02:01G | C*03:03:01G | B*15:01:01G | DRB1*13:01:01G | DQB1*03:03:02G |
| 397 | 0,00111 | A*24:02:01G | C*05:01:01G | B*15:01:01G | DRB1*13:01:01G | DQB1*05:01:01G |
| 398 | 0,00111 | A*24:02:01G | C*07:01:01G | B*15:17:01G | DRB1*15:01:01G | DQB1*06:02:01G |
| 399 | 0,00111 | A*24:02:01G | C*04:01:01G | B*18:01:01G | DRB1*14:01:01G | DQB1*05:01:01G |
| 400 | 0,00111 | A*24:02:01G | C*07:01:01G | B*18:01:01G | DRB1*11:01:01G | DQB1*03:02:01G |
| 401 | 0,00111 | A*24:02:01G | C*07:01:01G | B*18:01:01G | DRB1*13:01:01G | DQB1*03:02:01G |
| 402 | 0,00111 | A*24:02:01G | C*07:01:01G | B*18:01:01G | DRB1*13:05:01  | DQB1*03:01:01G |



|     |         |             |             |             |                |                |
|-----|---------|-------------|-------------|-------------|----------------|----------------|
| 403 | 0,00111 | A*24:02:01G | C*07:01:01G | B*18:01:01G | DRB1*16:01:01  | DQB1*05:02:01G |
| 404 | 0,00111 | A*24:02:01G | C*02:02:02G | B*27:05:02G | DRB1*08:07     | DQB1*04:02:01G |
| 405 | 0,00111 | A*24:02:01G | C*02:02:02G | B*27:05:02G | DRB1*11:01:01G | DQB1*03:01:01G |
| 406 | 0,00111 | A*24:02:01G | C*15:02:01G | B*27:05:02G | DRB1*04:01:01G | DQB1*03:01:01G |
| 407 | 0,00111 | A*24:02:01G | C*04:01:01G | B*35:02:01G | DRB1*07:01:01G | DQB1*02:01:01G |
| 408 | 0,00111 | A*24:02:01G | C*14:02:01G | B*35:05:01  | DRB1*14:02:01  | DQB1*03:01:01G |
| 409 | 0,00111 | A*24:02:01G | C*04:01:01G | B*35:08:01  | DRB1*13:02:01G | DQB1*06:04:01G |
| 410 | 0,00111 | A*24:02:01G | C*04:01:01G | B*35:09:01  | DRB1*08:02:01  | DQB1*05:01:01G |
| 411 | 0,00111 | A*24:02:01G | C*12:03:01G | B*38:01:01  | DRB1*04:02:01  | DQB1*04:02:01G |
| 412 | 0,00111 | A*24:02:01G | C*12:03:01G | B*38:01:01  | DRB1*07:01:01G | DQB1*02:01:01G |
| 413 | 0,00111 | A*24:02:01G | C*12:03:01G | B*38:01:01  | DRB1*13:03:01  | DQB1*03:01:01G |
| 414 | 0,00111 | A*24:02:01G | C*04:01:01G | B*39:01:01G | DRB1*14:02:01  | DQB1*05:01:01G |
| 415 | 0,00111 | A*24:02:01G | C*12:03:01G | B*39:01:01G | DRB1*08:02:01  | DQB1*06:02:01G |
| 416 | 0,00111 | A*24:02:01G | C*07:02:01G | B*39:03     | DRB1*14:06:01  | DQB1*03:01:01G |
| 417 | 0,00111 | A*24:02:01G | C*07:02:01G | B*39:05:01  | DRB1*13:02:01G | DQB1*03:02:01G |
| 418 | 0,00111 | A*24:02:01G | C*07:02:01G | B*39:09:01  | DRB1*04:02:01  | DQB1*03:02:01G |
| 419 | 0,00111 | A*24:02:01G | C*16:01:01G | B*39:09:01  | DRB1*08:02:01  | DQB1*05:01:01G |
| 420 | 0,00111 | A*24:02:01G | C*03:04:01G | B*40:01:01G | DRB1*14:01:01G | DQB1*05:03:01G |
| 421 | 0,00111 | A*24:02:01G | C*04:01:01G | B*40:01:01G | DRB1*04:05:01  | DQB1*03:02:01G |
| 422 | 0,00111 | A*24:02:01G | C*02:02:02G | B*40:02:01G | DRB1*04:05:01  | DQB1*03:02:01G |
| 423 | 0,00111 | A*24:02:01G | C*03:05     | B*40:02:01G | DRB1*04:07:01G | DQB1*03:02:01G |
| 424 | 0,00111 | A*24:02:01G | C*08:03:01G | B*40:02:01G | DRB1*09:01:02G | DQB1*03:03:02G |
| 425 | 0,00111 | A*24:02:01G | C*15:02:01G | B*40:02:01G | DRB1*01:01:01G | DQB1*05:01:01G |
| 426 | 0,00111 | A*24:02:01G | C*03:04:01G | B*40:04     | DRB1*04:07:01G | DQB1*03:02:01G |
| 427 | 0,00111 | A*24:02:01G | C*03:04:01G | B*40:04     | DRB1*04:11:01  | DQB1*03:02:01G |
| 428 | 0,00111 | A*24:02:01G | C*05:01:01G | B*44:02:01G | DRB1*04:03:01  | DQB1*03:04:01  |
| 429 | 0,00111 | A*24:02:01G | C*01:02:01G | B*44:03:01G | DRB1*01:01:01G | DQB1*06:02:01G |

|     |         |             |             |             |                |                |
|-----|---------|-------------|-------------|-------------|----------------|----------------|
| 430 | 0,00111 | A*24:02:01G | C*01:02:01G | B*44:03:01G | DRB1*07:01:01G | DQB1*03:02:01G |
| 431 | 0,00111 | A*24:02:01G | C*02:02:02G | B*44:03:01G | DRB1*13:03:01  | DQB1*03:01:01G |
| 432 | 0,00111 | A*24:02:01G | C*07:02:01G | B*45:01:01G | DRB1*10:01:01G | DQB1*03:02:01G |
| 433 | 0,00111 | A*24:02:01G | C*16:01:01G | B*45:01:01G | DRB1*14:01:01G | DQB1*05:03:01G |
| 434 | 0,00111 | A*24:02:01G | C*06:30     | B*47:01:01G | DRB1*16:01:01  | DQB1*05:02:01G |
| 435 | 0,00111 | A*24:02:01G | C*12:03:01G | B*48:01:01G | DRB1*01:01:01G | DQB1*05:01:01G |
| 436 | 0,00111 | A*24:02:01G | C*02:02:02G | B*51:01:01G | DRB1*01:03     | DQB1*05:01:01G |
| 437 | 0,00111 | A*24:02:01G | C*03:03:01G | B*51:01:01G | DRB1*01:02:01  | DQB1*05:01:01G |
| 438 | 0,00111 | A*24:02:01G | C*07:02:01G | B*51:01:01G | DRB1*13:02:01G | DQB1*04:02:01G |
| 439 | 0,00111 | A*24:02:01G | C*16:02:01G | B*51:08:01  | DRB1*16:01:01  | DQB1*05:02:01G |
| 440 | 0,00111 | A*24:02:01G | C*04:01:01G | B*53:01:01G | DRB1*08:07     | DQB1*06:04:01G |
| 441 | 0,00111 | A*24:02:01G | C*06:02:01G | B*53:01:01G | DRB1*13:03:01  | DQB1*02:01:01G |
| 442 | 0,00111 | A*24:02:01G | C*04:01:01G | B*57:01:01G | DRB1*04:02:01  | DQB1*06:03:01G |
| 443 | 0,00111 | A*24:02:01G | C*07:02:01G | B*58:01:01G | DRB1*03:01:01G | DQB1*02:01:01G |
| 444 | 0,00111 | A*24:02:01G | C*12:03:01G | B*67:01:02G | DRB1*01:01:01G | DQB1*05:01:01G |
| 445 | 0,00111 | A*24:02:01G | C*02:14:01G | B*81:01:01G | DRB1*12:01:01G | DQB1*05:01:01G |
| 446 | 0,00111 | A*24:02:02  | C*08:02:01G | B*49:01:01G | DRB1*10:01:01G | DQB1*05:01:01G |
| 447 | 0,00111 | A*24:03:01G | C*07:02:01G | B*07:02:01G | DRB1*11:04:01G | DQB1*03:01:01G |
| 448 | 0,00111 | A*24:03:01G | C*07:02:01G | B*07:02:01G | DRB1*15:01:01G | DQB1*05:03:01G |
| 449 | 0,00111 | A*24:03:01G | C*01:02:01G | B*15:20     | DRB1*04:11:01  | DQB1*03:02:01G |
| 450 | 0,00111 | A*24:03:01G | C*04:01:01G | B*35:01:01G | DRB1*04:10:01G | DQB1*03:02:01G |
| 451 | 0,00111 | A*24:03:01G | C*04:01:01G | B*37:01:01G | DRB1*01:01:01G | DQB1*05:01:01G |
| 452 | 0,00111 | A*24:03:01G | C*15:02:01G | B*39:01:01G | DRB1*08:07     | DQB1*06:04:01G |
| 453 | 0,00111 | A*24:03:01G | C*05:01:01G | B*40:04     | DRB1*04:07:03  | DQB1*03:02:01G |
| 454 | 0,00111 | A*24:03:01G | C*14:02:01G | B*51:01:01G | DRB1*11:01:01G | DQB1*03:01:01G |
| 455 | 0,00111 | A*24:03:01G | C*15:02:01G | B*51:13:01  | DRB1*08:02:01  | DQB1*04:02:01G |
| 456 | 0,00111 | A*24:175    | C*07:02:01G | B*35:04:01  | DRB1*01:01:01G | DQB1*03:01:01G |

|     |         |             |             |             |                |                |
|-----|---------|-------------|-------------|-------------|----------------|----------------|
| 457 | 0,00111 | A*25:01:01G | C*07:02:01G | B*07:02:01G | DRB1*01:01:01G | DQB1*05:01:01G |
| 458 | 0,00111 | A*25:01:01G | C*03:03:01G | B*15:01:01G | DRB1*01:01:01G | DQB1*05:01:01G |
| 459 | 0,00111 | A*25:01:01G | C*04:01:01G | B*18:01:01G | DRB1*07:01:01G | DQB1*02:01:01G |
| 460 | 0,00111 | A*25:01:01G | C*05:01:01G | B*18:01:01G | DRB1*14:01:01G | DQB1*05:03:01G |
| 461 | 0,00111 | A*25:01:01G | C*12:03:01G | B*18:01:01G | DRB1*01:03     | DQB1*05:01:01G |
| 462 | 0,00111 | A*25:01:01G | C*12:03:01G | B*35:03:01G | DRB1*01:03     | DQB1*05:03:01G |
| 463 | 0,00111 | A*25:01:01G | C*07:01:01G | B*39:05:01  | DRB1*08:02:01  | DQB1*04:02:01G |
| 464 | 0,00111 | A*25:01:01G | C*15:02:01G | B*40:02:01G | DRB1*14:02:01  | DQB1*06:02:01G |
| 465 | 0,00111 | A*25:01:01G | C*07:02:01G | B*51:01:01G | DRB1*14:02:01  | DQB1*03:01:01G |
| 466 | 0,00111 | A*25:01:01G | C*03:03:01G | B*55:01:01G | DRB1*14:01:01G | DQB1*05:03:01G |
| 467 | 0,00111 | A*26:01:01G | C*07:02:01G | B*07:02:01G | DRB1*11:03:01  | DQB1*03:01:01G |
| 468 | 0,00111 | A*26:01:01G | C*08:02:01G | B*14:01:01  | DRB1*01:03     | DQB1*05:01:01G |
| 469 | 0,00111 | A*26:01:01G | C*08:02:01G | B*14:01:01  | DRB1*15:02:01G | DQB1*06:01:01G |
| 470 | 0,00111 | A*26:01:01G | C*03:03:01G | B*15:04:01G | DRB1*16:02:01G | DQB1*03:01:01G |
| 471 | 0,00111 | A*26:01:01G | C*02:02:02G | B*15:18:01G | DRB1*13:01:01G | DQB1*02:01:01G |
| 472 | 0,00111 | A*26:01:01G | C*07:01:01G | B*18:01:01G | DRB1*13:05:01  | DQB1*03:01:01G |
| 473 | 0,00111 | A*26:01:01G | C*07:01:01G | B*18:01:01G | DRB1*15:01:01G | DQB1*02:01:01G |
| 474 | 0,00111 | A*26:01:01G | C*12:03:01G | B*18:01:01G | DRB1*11:04:01G | DQB1*03:01:01G |
| 475 | 0,00111 | A*26:01:01G | C*02:02:02G | B*27:02:01  | DRB1*15:01:01G | DQB1*06:02:01G |
| 476 | 0,00111 | A*26:01:01G | C*07:01:01G | B*27:07:01G | DRB1*13:01:01G | DQB1*06:03:01G |
| 477 | 0,00111 | A*26:01:01G | C*04:01:01G | B*35:01:01G | DRB1*04:07:01G | DQB1*03:01:01G |
| 478 | 0,00111 | A*26:01:01G | C*12:03:01G | B*35:08:01  | DRB1*13:03:01  | DQB1*03:01:01G |
| 479 | 0,00111 | A*26:01:01G | C*04:01:01G | B*35:20:01  | DRB1*08:02:01  | DQB1*03:02:01G |
| 480 | 0,00111 | A*26:01:01G | C*05:01:01G | B*38:01:01  | DRB1*04:02:01  | DQB1*04:02:01G |
| 481 | 0,00111 | A*26:01:01G | C*12:03:01G | B*44:02:01G | DRB1*08:01:01G | DQB1*03:02:01G |
| 482 | 0,00111 | A*26:01:01G | C*12:03:01G | B*44:03:01G | DRB1*11:04:01G | DQB1*03:01:01G |
| 483 | 0,00111 | A*26:01:01G | C*16:01:01G | B*44:03:01G | DRB1*03:01:01G | DQB1*03:02:01G |

|     |         |             |             |             |                |                |
|-----|---------|-------------|-------------|-------------|----------------|----------------|
| 484 | 0,00111 | A*26:01:01G | C*07:02:01G | B*51:01:01G | DRB1*13:01:01G | DQB1*03:01:01G |
| 485 | 0,00111 | A*26:01:01G | C*15:02:01G | B*51:01:01G | DRB1*11:01:01G | DQB1*03:01:01G |
| 486 | 0,00111 | A*26:01:01G | C*14:02:01G | B*51:07:01  | DRB1*15:01:01G | DQB1*05:02:01G |
| 487 | 0,00111 | A*26:01:01G | C*04:01:01G | B*53:01:01G | DRB1*03:02:01  | DQB1*04:02:01G |
| 488 | 0,00111 | A*26:01:01G | C*08:02:01G | B*55:01:01G | DRB1*11:01:02  | DQB1*06:02:01G |
| 489 | 0,00111 | A*29:01:01G | C*15:05:01G | B*07:05:01G | DRB1*09:01:02G | DQB1*03:03:02G |
| 490 | 0,00111 | A*29:01:01G | C*07:01:01G | B*44:02:01G | DRB1*11:04:01G | DQB1*03:01:01G |
| 491 | 0,00111 | A*29:02:01G | C*07:01:01G | B*08:01:01G | DRB1*15:01:01G | DQB1*05:01:01G |
| 492 | 0,00111 | A*29:02:01G | C*16:01:01G | B*14:02:01G | DRB1*01:02:01  | DQB1*03:01:01G |
| 493 | 0,00111 | A*29:02:01G | C*14:02:01G | B*15:04:01G | DRB1*13:01:01G | DQB1*06:03:01G |
| 494 | 0,00111 | A*29:02:01G | C*06:02:01G | B*15:15     | DRB1*04:01:01G | DQB1*03:01:01G |
| 495 | 0,00111 | A*29:02:01G | C*16:01:01G | B*18:01:01G | DRB1*11:04:01G | DQB1*03:01:01G |
| 496 | 0,00111 | A*29:02:01G | C*16:01:01G | B*44:03:01G | DRB1*11:01:01G | DQB1*03:01:01G |
| 497 | 0,00111 | A*29:02:01G | C*16:01:01G | B*44:03:01G | DRB1*12:01:01G | DQB1*03:02:01G |
| 498 | 0,00111 | A*29:02:01G | C*16:01:01G | B*44:03:01G | DRB1*15:01:01G | DQB1*06:02:01G |
| 499 | 0,00111 | A*29:02:01G | C*08:02:01G | B*44:04     | DRB1*11:01:01G | DQB1*05:01:01G |
| 500 | 0,00111 | A*29:02:01G | C*16:01:01G | B*44:04     | DRB1*11:01:01G | DQB1*03:01:01G |
| 501 | 0,00111 | A*29:02:01G | C*04:01:01G | B*51:01:01G | DRB1*11:04:01G | DQB1*03:01:01G |
| 502 | 0,00111 | A*29:02:01G | C*07:01:01G | B*57:03:01G | DRB1*11:01:01G | DQB1*03:01:01G |
| 503 | 0,00111 | A*30:01:01G | C*07:02:01G | B*07:02:01G | DRB1*07:01:01G | DQB1*03:03:02G |
| 504 | 0,00111 | A*30:01:01G | C*06:02:01G | B*13:02:01G | DRB1*03:01:01G | DQB1*02:01:01G |
| 505 | 0,00111 | A*30:01:01G | C*06:02:01G | B*13:02:01G | DRB1*14:01:01G | DQB1*05:03:01G |
| 506 | 0,00111 | A*30:01:01G | C*07:02:01G | B*39:01:01G | DRB1*14:01:01G | DQB1*05:03:01G |
| 507 | 0,00111 | A*30:01:01G | C*04:01:01G | B*44:03:01G | DRB1*15:01:01G | DQB1*06:02:01G |
| 508 | 0,00111 | A*30:01:01G | C*17:01:01G | B*44:03:01G | DRB1*01:01:01G | DQB1*05:01:01G |
| 509 | 0,00111 | A*30:01:01G | C*02:02:02G | B*44:05:01  | DRB1*01:01:01G | DQB1*05:01:01G |
| 510 | 0,00111 | A*30:01:01G | C*07:01:01G | B*51:01:01G | DRB1*14:01:01G | DQB1*02:01:01G |

|     |         |             |             |             |                |                |
|-----|---------|-------------|-------------|-------------|----------------|----------------|
| 511 | 0,00111 | A*30:01:01G | C*12:02:01G | B*52:01:01G | DRB1*16:01:01  | DQB1*05:02:01G |
| 512 | 0,00111 | A*30:01:01G | C*06:02:01G | B*58:02:01  | DRB1*15:03:01G | DQB1*06:02:01G |
| 513 | 0,00111 | A*30:02:01G | C*03:03:01G | B*15:01:01G | DRB1*08:02:01  | DQB1*05:02:01G |
| 514 | 0,00111 | A*30:02:01G | C*02:10:01G | B*15:03:01G | DRB1*11:04:01G | DQB1*06:11:01  |
| 515 | 0,00111 | A*30:02:01G | C*03:04:01G | B*27:02:01  | DRB1*13:02:01G | DQB1*06:04:01G |
| 516 | 0,00111 | A*30:02:01G | C*04:01:01G | B*35:01:01G | DRB1*08:01:01G | DQB1*04:02:01G |
| 517 | 0,00111 | A*30:02:01G | C*04:01:01G | B*35:01:01G | DRB1*15:02:01G | DQB1*06:01:01G |
| 518 | 0,00111 | A*30:02:01G | C*12:03:01G | B*39:01:01G | DRB1*01:02:01  | DQB1*05:01:01G |
| 519 | 0,00111 | A*30:02:01G | C*07:01:01G | B*39:05:01  | DRB1*14:02:01  | DQB1*03:01:01G |
| 520 | 0,00111 | A*30:02:01G | C*07:01:01G | B*40:02:01G | DRB1*13:03:01  | DQB1*03:01:01G |
| 521 | 0,00111 | A*30:02:01G | C*18:01:01G | B*57:03:01G | DRB1*13:01:01G | DQB1*05:01:01G |
| 522 | 0,00111 | A*30:02:01G | C*07:01:01G | B*58:01:01G | DRB1*13:02:01G | DQB1*06:04:01G |
| 523 | 0,00111 | A*30:04:01G | C*06:02:01G | B*58:02:01  | DRB1*13:03:01  | DQB1*03:01:01G |
| 524 | 0,00111 | A*31:01:02G | C*15:02:01G | B*07:02:01G | DRB1*01:03     | DQB1*05:01:01G |
| 525 | 0,00111 | A*31:01:02G | C*15:05:01G | B*07:05:01G | DRB1*04:03:01  | DQB1*03:02:01G |
| 526 | 0,00111 | A*31:01:02G | C*06:02:01G | B*13:02:01G | DRB1*13:01:01G | DQB1*06:03:01G |
| 527 | 0,00111 | A*31:01:02G | C*08:02:01G | B*14:02:01G | DRB1*01:02:01  | DQB1*05:01:01G |
| 528 | 0,00111 | A*31:01:02G | C*08:02:01G | B*14:02:01G | DRB1*15:03:01G | DQB1*06:02:01G |
| 529 | 0,00111 | A*31:01:02G | C*03:03:01G | B*15:01:01G | DRB1*04:08:01  | DQB1*03:01:01G |
| 530 | 0,00111 | A*31:01:02G | C*07:01:01G | B*15:01:01G | DRB1*07:01:01G | DQB1*03:02:01G |
| 531 | 0,00111 | A*31:01:02G | C*03:03:01G | B*15:04:01G | DRB1*09:01:02G | DQB1*03:03:02G |
| 532 | 0,00111 | A*31:01:02G | C*07:02:01G | B*15:10:01  | DRB1*04:11:01  | DQB1*03:02:01G |
| 533 | 0,00111 | A*31:01:02G | C*03:03:01G | B*15:70     | DRB1*04:04:01  | DQB1*03:01:01G |
| 534 | 0,00111 | A*31:01:02G | C*07:02:01G | B*18:01:01G | DRB1*13:01:01G | DQB1*06:03:01G |
| 535 | 0,00111 | A*31:01:02G | C*15:02:01G | B*35:01:01G | DRB1*08:02:01  | DQB1*05:01:01G |
| 536 | 0,00111 | A*31:01:02G | C*08:03:01G | B*35:04:01  | DRB1*14:02:01  | DQB1*03:01:01G |
| 537 | 0,00111 | A*31:01:02G | C*12:02:01G | B*35:09:01  | DRB1*04:07:01G | DQB1*03:02:01G |

|     |         |             |             |             |                |                |
|-----|---------|-------------|-------------|-------------|----------------|----------------|
| 538 | 0,00111 | A*31:01:02G | C*07:02:01G | B*39:02:02  | DRB1*16:02:01G | DQB1*03:01:01G |
| 539 | 0,00111 | A*31:01:02G | C*07:02:01G | B*39:03     | DRB1*09:01:02G | DQB1*03:01:01G |
| 540 | 0,00111 | A*31:01:02G | C*07:02:01G | B*39:05:01  | DRB1*04:07:03  | DQB1*03:02:01G |
| 541 | 0,00111 | A*31:01:02G | C*07:02:01G | B*39:05:01  | DRB1*08:02:01  | DQB1*03:02:01G |
| 542 | 0,00111 | A*31:01:02G | C*07:02:01G | B*39:05:01  | DRB1*14:02:01  | DQB1*03:01:01G |
| 543 | 0,00111 | A*31:01:02G | C*17:01:01G | B*39:05:01  | DRB1*04:03:01  | DQB1*03:01:01G |
| 544 | 0,00111 | A*31:01:02G | C*03:04:01G | B*39:13:01  | DRB1*16:02:01G | DQB1*04:02:01G |
| 545 | 0,00111 | A*31:01:02G | C*02:02:02G | B*40:02:01G | DRB1*16:01:01  | DQB1*05:02:01G |
| 546 | 0,00111 | A*31:01:02G | C*03:03:01G | B*40:02:01G | DRB1*14:02:01  | DQB1*03:01:01G |
| 547 | 0,00111 | A*31:01:02G | C*05:01:01G | B*44:02:01G | DRB1*01:01:01G | DQB1*05:01:01G |
| 548 | 0,00111 | A*31:01:02G | C*03:04:01G | B*45:01:01G | DRB1*04:04:01  | DQB1*03:02:01G |
| 549 | 0,00111 | A*31:01:02G | C*08:03:01G | B*48:01:01G | DRB1*09:01:02G | DQB1*06:03:01G |
| 550 | 0,00111 | A*31:01:02G | C*01:02:01G | B*51:01:01G | DRB1*01:01:01G | DQB1*05:01:01G |
| 551 | 0,00111 | A*31:01:02G | C*04:01:01G | B*51:01:01G | DRB1*04:02:01  | DQB1*02:01:01G |
| 552 | 0,00111 | A*31:01:02G | C*07:02:01G | B*51:01:01G | DRB1*10:01:01G | DQB1*03:01:01G |
| 553 | 0,00111 | A*31:01:02G | C*15:08     | B*51:01:01G | DRB1*04:11:01  | DQB1*03:02:01G |
| 554 | 0,00111 | A*31:01:02G | C*03:03:01G | B*55:01:01G | DRB1*16:01:01  | DQB1*05:02:01G |
| 555 | 0,00111 | A*31:01:02G | C*07:02:01G | B*58:02:01  | DRB1*11:02:01  | DQB1*04:02:01G |
| 556 | 0,00111 | A*31:02     | C*04:01:01G | B*39:05:01  | DRB1*14:02:01  | DQB1*03:01:01G |
| 557 | 0,00111 | A*32:01:01G | C*07:04:01G | B*07:02:01G | DRB1*13:01:01G | DQB1*06:03:01G |
| 558 | 0,00111 | A*32:01:01G | C*07:01:01G | B*08:01:01G | DRB1*07:01:01G | DQB1*05:02:01G |
| 559 | 0,00111 | A*32:01:01G | C*08:02:01G | B*14:01:01  | DRB1*04:05:01  | DQB1*02:01:01G |
| 560 | 0,00111 | A*32:01:01G | C*08:02:01G | B*14:01:01  | DRB1*11:01:01G | DQB1*06:02:01G |
| 561 | 0,00111 | A*32:01:01G | C*08:02:01G | B*14:01:01  | DRB1*15:01:01G | DQB1*04:02:01G |
| 562 | 0,00111 | A*32:01:01G | C*02:02:02G | B*14:02:01G | DRB1*01:02:01  | DQB1*05:01:01G |
| 563 | 0,00111 | A*32:01:01G | C*08:02:01G | B*14:02:01G | DRB1*11:01:01G | DQB1*03:01:01G |
| 564 | 0,00111 | A*32:01:01G | C*03:03:01G | B*15:01:01G | DRB1*01:03     | DQB1*06:03:01G |

|     |         |             |             |             |                |                |
|-----|---------|-------------|-------------|-------------|----------------|----------------|
| 565 | 0,00111 | A*32:01:01G | C*03:04:02  | B*15:10:01  | DRB1*13:02:01G | DQB1*05:01:01G |
| 566 | 0,00111 | A*32:01:01G | C*07:02:01G | B*18:01:01G | DRB1*04:03:01  | DQB1*03:02:01G |
| 567 | 0,00111 | A*32:01:01G | C*03:03:01G | B*35:01:01G | DRB1*08:01:01G | DQB1*03:01:01G |
| 568 | 0,00111 | A*32:01:01G | C*04:01:01G | B*35:01:01G | DRB1*04:03:01  | DQB1*03:02:01G |
| 569 | 0,00111 | A*32:01:01G | C*06:02:01G | B*35:01:01G | DRB1*11:01:01G | DQB1*03:01:01G |
| 570 | 0,00111 | A*32:01:01G | C*07:01:01G | B*35:01:01G | DRB1*14:01:01G | DQB1*03:02:01G |
| 571 | 0,00111 | A*32:01:01G | C*04:01:01G | B*35:03:01G | DRB1*11:01:01G | DQB1*03:01:01G |
| 572 | 0,00111 | A*32:01:01G | C*06:02:01G | B*35:03:01G | DRB1*13:01:01G | DQB1*03:02:01G |
| 573 | 0,00111 | A*32:01:01G | C*07:02:01G | B*39:06:02  | DRB1*14:01:01G | DQB1*05:03:01G |
| 574 | 0,00111 | A*32:01:01G | C*03:04:01G | B*40:01:01G | DRB1*13:02:01G | DQB1*06:04:01G |
| 575 | 0,00111 | A*32:01:01G | C*03:04:01G | B*40:01:01G | DRB1*13:03:01  | DQB1*06:03:01G |
| 576 | 0,00111 | A*32:01:01G | C*02:02:02G | B*40:02:01G | DRB1*14:01:01G | DQB1*05:03:01G |
| 577 | 0,00111 | A*32:01:01G | C*07:04:01G | B*40:02:01G | DRB1*07:01:01G | DQB1*06:03:01G |
| 578 | 0,00111 | A*32:01:01G | C*07:01:01G | B*41:01:01  | DRB1*11:01:02  | DQB1*03:01:01G |
| 579 | 0,00111 | A*32:01:01G | C*17:01:01G | B*41:01:01  | DRB1*16:01:01  | DQB1*05:02:01G |
| 580 | 0,00111 | A*32:01:01G | C*05:01:01G | B*44:02:01G | DRB1*16:01:01  | DQB1*05:02:01G |
| 581 | 0,00111 | A*32:01:01G | C*07:01:01G | B*44:03:01G | DRB1*11:03:01  | DQB1*03:01:01G |
| 582 | 0,00111 | A*32:01:01G | C*14:02:01G | B*51:01:01G | DRB1*13:05:01  | DQB1*03:01:01G |
| 583 | 0,00111 | A*32:01:01G | C*16:04:01  | B*51:01:01G | DRB1*11:04:01G | DQB1*03:01:01G |
| 584 | 0,00111 | A*32:01:01G | C*15:02:01G | B*51:08:01  | DRB1*13:03:01  | DQB1*03:02:01G |
| 585 | 0,00111 | A*32:01:01G | C*04:01:01G | B*52:01:01G | DRB1*15:02:01G | DQB1*06:01:01G |
| 586 | 0,00111 | A*32:01:01G | C*15:02:01G | B*52:01:01G | DRB1*04:08:01  | DQB1*03:01:01G |
| 587 | 0,00111 | A*33:01:01G | C*07:02:01G | B*07:02:01G | DRB1*15:01:01G | DQB1*06:03:01G |
| 588 | 0,00111 | A*33:01:01G | C*12:03:01G | B*18:01:01G | DRB1*07:01:01G | DQB1*02:01:01G |
| 589 | 0,00111 | A*33:01:01G | C*02:02:02G | B*38:01:01  | DRB1*15:01:01G | DQB1*06:02:01G |
| 590 | 0,00111 | A*33:01:01G | C*14:02:01G | B*44:03:01G | DRB1*04:01:01G | DQB1*03:02:01G |
| 591 | 0,00111 | A*33:01:01G | C*15:02:01G | B*51:13:01  | DRB1*08:02:01  | DQB1*04:02:01G |

|     |         |             |             |             |                |                |
|-----|---------|-------------|-------------|-------------|----------------|----------------|
| 592 | 0,00111 | A*33:01:01G | C*06:02:01G | B*57:01:01G | DRB1*07:01:01G | DQB1*03:03:02G |
| 593 | 0,00111 | A*33:01:01G | C*16:01:01G | B*78:01:01  | DRB1*11:03:01  | DQB1*05:01:01G |
| 594 | 0,00111 | A*33:03:01G | C*04:01:01G | B*35:01:01G | DRB1*04:02:01  | DQB1*04:02:01G |
| 595 | 0,00111 | A*33:03:01G | C*04:01:01G | B*35:08:01  | DRB1*04:07:01G | DQB1*05:01:01G |
| 596 | 0,00111 | A*33:03:01G | C*15:02:01G | B*51:01:01G | DRB1*04:07:01G | DQB1*03:01:01G |
| 597 | 0,00111 | A*33:03:01G | C*07:01:01G | B*58:01:01G | DRB1*13:02:01G | DQB1*06:09:01G |
| 598 | 0,00111 | A*33:05     | C*08:02:01G | B*14:02:01G | DRB1*07:01:01G | DQB1*03:03:02G |
| 599 | 0,00111 | A*34:02:01  | C*06:02:01G | B*35:01:01G | DRB1*04:01:01G | DQB1*03:02:01G |
| 600 | 0,00111 | A*66:01:01G | C*03:04:01G | B*15:01:01G | DRB1*14:02:01  | DQB1*03:01:01G |
| 601 | 0,00111 | A*66:01:01G | C*03:04:01G | B*40:02:01G | DRB1*16:02:01G | DQB1*03:01:01G |
| 602 | 0,00111 | A*66:01:01G | C*08:01:01G | B*44:03:01G | DRB1*14:02:01  | DQB1*03:01:01G |
| 603 | 0,00111 | A*66:01:01G | C*01:02:01G | B*49:18:02  | DRB1*04:02:01  | DQB1*02:01:01G |
| 604 | 0,00111 | A*66:01:01G | C*07:04:01G | B*58:02:01  | DRB1*13:01:01G | DQB1*03:03:02G |
| 605 | 0,00111 | A*68:01:01G | C*03:03:01G | B*15:01:01G | DRB1*13:01:01G | DQB1*06:03:01G |
| 606 | 0,00111 | A*68:01:01G | C*12:03:01G | B*18:01:01G | DRB1*16:01:01  | DQB1*05:02:01G |
| 607 | 0,00111 | A*68:01:01G | C*04:01:01G | B*35:01:01G | DRB1*01:01:01G | DQB1*05:01:01G |
| 608 | 0,00111 | A*68:01:01G | C*04:01:01G | B*35:01:01G | DRB1*16:01:01  | DQB1*05:02:01G |
| 609 | 0,00111 | A*68:01:01G | C*04:01:01G | B*35:03:01G | DRB1*15:01:01G | DQB1*06:02:01G |
| 610 | 0,00111 | A*68:01:01G | C*03:04:01G | B*40:01:01G | DRB1*01:02:01  | DQB1*05:01:01G |
| 611 | 0,00111 | A*68:01:01G | C*05:01:01G | B*44:02:01G | DRB1*11:04:01G | DQB1*03:01:01G |
| 612 | 0,00111 | A*68:01:02G | C*02:02:02G | B*07:02:01G | DRB1*15:01:01G | DQB1*04:02:01G |
| 613 | 0,00111 | A*68:01:02G | C*06:02:01G | B*13:02:01G | DRB1*13:05:01  | DQB1*04:02:01G |
| 614 | 0,00111 | A*68:01:02G | C*07:01:01G | B*14:02:01G | DRB1*01:02:01  | DQB1*05:01:01G |
| 615 | 0,00111 | A*68:01:02G | C*03:03:01G | B*15:04:01G | DRB1*14:02:01  | DQB1*03:01:01G |
| 616 | 0,00111 | A*68:01:02G | C*15:02:01G | B*15:08:01  | DRB1*09:01:02G | DQB1*03:03:02G |
| 617 | 0,00111 | A*68:01:02G | C*01:02:01G | B*27:05:02G | DRB1*12:01:01G | DQB1*03:01:01G |
| 618 | 0,00111 | A*68:01:02G | C*04:01:01G | B*35:03:01G | DRB1*04:04:01  | DQB1*03:02:01G |



|     |         |             |             |             |                |                |
|-----|---------|-------------|-------------|-------------|----------------|----------------|
| 619 | 0,00111 | A*68:01:02G | C*04:01:01G | B*35:04:01  | DRB1*14:02:01  | DQB1*03:01:01G |
| 620 | 0,00111 | A*68:01:02G | C*06:02:01G | B*35:09:01  | DRB1*08:04:01  | DQB1*03:02:01G |
| 621 | 0,00111 | A*68:01:02G | C*04:01:01G | B*39:03     | DRB1*07:01:01G | DQB1*03:02:01G |
| 622 | 0,00111 | A*68:01:02G | C*07:02:01G | B*39:09:01  | DRB1*16:02:01G | DQB1*03:01:01G |
| 623 | 0,00111 | A*68:01:02G | C*12:03:01G | B*39:10:01  | DRB1*13:02:01G | DQB1*03:02:01G |
| 624 | 0,00111 | A*68:01:02G | C*03:04:01G | B*40:01:01G | DRB1*04:07:01G | DQB1*03:02:01G |
| 625 | 0,00111 | A*68:01:02G | C*03:04:01G | B*40:01:01G | DRB1*15:01:01G | DQB1*03:01:01G |
| 626 | 0,00111 | A*68:01:02G | C*07:02:01G | B*44:02:01G | DRB1*13:01:01G | DQB1*06:03:01G |
| 627 | 0,00111 | A*68:01:02G | C*01:02:01G | B*46:01:01G | DRB1*14:02:01  | DQB1*05:02:01G |
| 628 | 0,00111 | A*68:01:02G | C*08:03:01G | B*48:01:01G | DRB1*08:02:01  | DQB1*04:02:01G |
| 629 | 0,00111 | A*68:01:02G | C*15:02:01G | B*52:01:02  | DRB1*04:11:01  | DQB1*03:02:01G |
| 630 | 0,00111 | A*68:01:02G | C*01:02:01G | B*56:01:01G | DRB1*13:02:01G | DQB1*03:02:01G |
| 631 | 0,00111 | A*68:02:01G | C*03:04:01G | B*08:01:01G | DRB1*13:04     | DQB1*03:01:01G |
| 632 | 0,00111 | A*68:02:01G | C*02:02:02G | B*14:02:01G | DRB1*13:02:01G | DQB1*04:02:01G |
| 633 | 0,00111 | A*68:02:01G | C*04:01:01G | B*14:02:01G | DRB1*04:04:01  | DQB1*03:02:01G |
| 634 | 0,00111 | A*68:02:01G | C*08:02:01G | B*14:02:01G | DRB1*13:03:01  | DQB1*03:01:01G |
| 635 | 0,00111 | A*68:02:01G | C*03:04:02  | B*15:10:01  | DRB1*15:03:01G | DQB1*06:02:01G |
| 636 | 0,00111 | A*68:02:01G | C*05:01:01G | B*18:01:01G | DRB1*03:01:01G | DQB1*03:03:02G |
| 637 | 0,00111 | A*68:02:01G | C*01:02:01G | B*27:05:02G | DRB1*01:01:01G | DQB1*05:01:01G |
| 638 | 0,00111 | A*68:02:01G | C*04:01:01G | B*35:08:01  | DRB1*15:01:01G | DQB1*06:02:01G |
| 639 | 0,00111 | A*68:02:01G | C*04:01:01G | B*53:01:01G | DRB1*01:01:01G | DQB1*05:01:01G |
| 640 | 0,00111 | A*68:02:01G | C*04:01:01G | B*53:01:01G | DRB1*01:02:01  | DQB1*05:01:01G |
| 641 | 0,00111 | A*68:02:01G | C*16:01:01G | B*57:01:01G | DRB1*01:02:01  | DQB1*05:01:01G |
| 642 | 0,00111 | A*68:02:01G | C*07:01:01G | B*57:03:01G | DRB1*09:01:02G | DQB1*03:01:01G |
| 643 | 0,00111 | A*68:17     | C*04:01:01G | B*35:05:01  | DRB1*04:04:01  | DQB1*03:02:01G |
| 644 | 0,00111 | A*68:17     | C*07:02:01G | B*35:05:01  | DRB1*03:01:01G | DQB1*02:01:01G |
| 645 | 0,00111 | A*68:17     | C*04:01:01G | B*35:06     | DRB1*04:07:01G | DQB1*03:01:01G |

|     |         |             |             |             |                |                |
|-----|---------|-------------|-------------|-------------|----------------|----------------|
| 646 | 0,00111 | A*68:17     | C*07:02:01G | B*35:06     | DRB1*08:07     | DQB1*03:01:01G |
| 647 | 0,00111 | A*68:17     | C*08:01:01G | B*35:19     | DRB1*08:02:01  | DQB1*03:02:01G |
| 648 | 0,00111 | A*68:17     | C*17:01:01G | B*41:02:01G | DRB1*13:03:01  | DQB1*03:01:01G |
| 649 | 0,00111 | A*68:17     | C*08:01:01G | B*48:03:01  | DRB1*14:06:01  | DQB1*03:01:01G |
| 650 | 0,00111 | A*68:17     | C*04:01:01G | B*50:01:01G | DRB1*13:03:01  | DQB1*03:01:01G |
| 651 | 0,00111 | A*68:23     | C*01:02:01G | B*48:01:01G | DRB1*09:01:02G | DQB1*03:03:02G |
| 652 | 0,00111 | A*74:01:01G | C*03:04:01G | B*53:01:01G | DRB1*13:02:01G | DQB1*06:04:01G |
| 653 | 0,00111 | A*80:01:01G | C*17:01:01G | B*41:02:01G | DRB1*12:01:01G | DQB1*03:01:01G |
| 654 | 0,00111 | A*80:01:01G | C*02:02:02G | B*49:01:01G | DRB1*13:01:01G | DQB1*06:03:01G |
| 655 | 0,00111 | A*80:01:01G | C*15:02:01G | B*51:01:01G | DRB1*11:02:01  | DQB1*03:01:01G |

Supplementary Table 5: Estimated haplotypes and frequencies for SAE group  
 Five-locus haplotype frequencies (A~C~B~DRB1~DQB1) were estimated for SAE group, using the iterative expectation maximization (EM) algorithm ( $\epsilon=1e^{-7}$ )

| Pos | Freq    | Haplotype   |             |             |                |                |
|-----|---------|-------------|-------------|-------------|----------------|----------------|
| 1   | 0,02047 | A*29:02:01G | C*16:01:01G | B*44:03:01G | DRB1*07:01:01G | DQB1*02:01:01G |
| 2   | 0,01462 | A*02:01:01G | C*05:01:01G | B*44:02:01G | DRB1*01:01:01G | DQB1*05:01:01G |
| 3   | 0,01462 | A*02:01:01G | C*15:02:01G | B*51:01:01G | DRB1*11:01:01G | DQB1*03:01:01G |
| 4   | 0,01462 | A*24:02:01G | C*12:03:01G | B*18:01:01G | DRB1*11:04:01G | DQB1*03:01:01G |
| 5   | 0,01427 | A*03:01:01G | C*04:01:01G | B*35:01:01G | DRB1*01:01:01G | DQB1*05:01:01G |
| 6   | 0,00877 | A*01:01:01G | C*07:01:01G | B*08:01:01G | DRB1*03:01:01G | DQB1*02:01:01G |
| 7   | 0,00877 | A*01:01:01G | C*06:02:01G | B*44:03:01G | DRB1*15:01:01G | DQB1*06:02:01G |
| 8   | 0,00877 | A*03:01:01G | C*02:02:02G | B*51:01:01G | DRB1*11:01:01G | DQB1*03:01:01G |
| 9   | 0,00877 | A*11:01:01G | C*04:01:01G | B*35:01:01G | DRB1*01:03     | DQB1*05:01:01G |
| 10  | 0,00877 | A*26:01:01G | C*05:01:01G | B*44:02:01G | DRB1*04:02:01  | DQB1*03:02:01G |
| 11  | 0,00877 | A*30:01:01G | C*06:02:01G | B*13:02:01G | DRB1*07:01:01G | DQB1*02:01:01G |
| 12  | 0,00877 | A*30:02:01G | C*05:01:01G | B*18:01:01G | DRB1*03:01:01G | DQB1*02:01:01G |
| 13  | 0,00585 | A*01:01:01G | C*08:02:01G | B*14:01:01  | DRB1*15:01:01G | DQB1*02:01:01G |
| 14  | 0,00585 | A*01:01:01G | C*07:01:01G | B*15:17:01G | DRB1*11:01:01G | DQB1*03:01:01G |
| 15  | 0,00585 | A*02:01:01G | C*08:02:01G | B*14:02:01G | DRB1*07:01:01G | DQB1*02:01:01G |
| 16  | 0,00585 | A*02:01:01G | C*05:01:01G | B*18:01:01G | DRB1*03:01:01G | DQB1*02:01:01G |
| 17  | 0,00585 | A*02:01:01G | C*16:01:01G | B*44:03:01G | DRB1*15:01:01G | DQB1*06:02:01G |
| 18  | 0,00585 | A*02:01:01G | C*14:02:01G | B*51:01:01G | DRB1*01:01:01G | DQB1*05:01:01G |
| 19  | 0,00585 | A*02:05:01G | C*07:02:01G | B*07:02:01G | DRB1*13:01:01G | DQB1*06:03:01G |
| 20  | 0,00585 | A*03:01:01G | C*07:02:01G | B*07:02:01G | DRB1*15:01:01G | DQB1*06:02:01G |
| 21  | 0,00585 | A*03:01:01G | C*04:01:01G | B*35:02:01G | DRB1*11:04:01G | DQB1*03:01:01G |
| 22  | 0,00585 | A*11:01:01G | C*04:01:01G | B*35:01:01G | DRB1*14:01:01G | DQB1*05:03:01G |

|    |         |             |             |             |                |                |
|----|---------|-------------|-------------|-------------|----------------|----------------|
| 23 | 0,00585 | A*24:02:01G | C*07:01:01G | B*07:02:01G | DRB1*15:01:01G | DQB1*06:02:01G |
| 24 | 0,00585 | A*24:02:01G | C*04:01:01G | B*08:01:01G | DRB1*11:04:01G | DQB1*03:01:01G |
| 25 | 0,00585 | A*24:02:01G | C*07:01:01G | B*08:01:01G | DRB1*03:01:01G | DQB1*02:01:01G |
| 26 | 0,00585 | A*24:02:01G | C*06:02:01G | B*13:02:01G | DRB1*13:03:01  | DQB1*03:01:01G |
| 27 | 0,00585 | A*24:02:01G | C*03:03:01G | B*15:01:01G | DRB1*11:03:01  | DQB1*03:01:01G |
| 28 | 0,00585 | A*24:02:01G | C*12:03:01G | B*18:01:01G | DRB1*03:01:01G | DQB1*02:01:01G |
| 29 | 0,00585 | A*24:02:01G | C*02:02:02G | B*44:03:01G | DRB1*01:02:01  | DQB1*05:01:01G |
| 30 | 0,00585 | A*24:02:01G | C*16:01:01G | B*44:03:01G | DRB1*11:01:01G | DQB1*03:01:01G |
| 31 | 0,00585 | A*24:02:01G | C*02:02:02G | B*51:01:01G | DRB1*13:01:01G | DQB1*06:03:01G |
| 32 | 0,00585 | A*25:01:01G | C*12:03:01G | B*18:01:01G | DRB1*01:03     | DQB1*05:01:01G |
| 33 | 0,00585 | A*25:01:01G | C*12:03:01G | B*18:01:01G | DRB1*15:01:01G | DQB1*06:02:01G |
| 34 | 0,00585 | A*31:01:02G | C*07:01:01G | B*08:01:01G | DRB1*03:01:01G | DQB1*02:01:01G |
| 35 | 0,00585 | A*31:01:02G | C*03:04:01G | B*40:01:01G | DRB1*04:04:01  | DQB1*03:02:01G |
| 36 | 0,00585 | A*32:01:01G | C*08:02:01G | B*14:01:01  | DRB1*15:01:01G | DQB1*06:02:01G |
| 37 | 0,00585 | A*32:01:01G | C*12:02:01G | B*52:01:01G | DRB1*15:02:01G | DQB1*06:01:01G |
| 38 | 0,00585 | A*33:01:01G | C*08:02:01G | B*14:02:01G | DRB1*01:02:01  | DQB1*05:01:01G |
| 39 | 0,00585 | A*33:01:01G | C*08:02:01G | B*14:02:01G | DRB1*07:01:01G | DQB1*02:01:01G |
| 40 | 0,00585 | A*33:01:01G | C*08:02:01G | B*14:02:01G | DRB1*13:03:01  | DQB1*03:01:01G |
| 41 | 0,00550 | A*01:01:01G | C*06:02:01G | B*57:01:01G | DRB1*07:01:01G | DQB1*03:03:02G |
| 42 | 0,00328 | A*01:01:01G | C*04:01:01G | B*35:01:01G | DRB1*01:01:01G | DQB1*05:01:01G |
| 43 | 0,00328 | A*03:01:01G | C*06:02:01G | B*57:01:01G | DRB1*07:01:01G | DQB1*03:03:02G |
| 44 | 0,00292 | A*01:01:01G | C*04:01:01G | B*07:02:01G | DRB1*08:04:01  | DQB1*04:02:01G |
| 45 | 0,00292 | A*01:01:01G | C*15:05:01G | B*07:05:01G | DRB1*15:01:01G | DQB1*06:02:01G |
| 46 | 0,00292 | A*01:01:01G | C*05:01:01G | B*15:01:01G | DRB1*08:04:01  | DQB1*02:01:01G |
| 47 | 0,00292 | A*01:01:01G | C*07:01:01G | B*18:03     | DRB1*07:01:01G | DQB1*03:01:01G |
| 48 | 0,00292 | A*01:01:01G | C*04:01:01G | B*35:08:01  | DRB1*04:04:01  | DQB1*04:02:01G |

|    |         |             |             |             |                |                |
|----|---------|-------------|-------------|-------------|----------------|----------------|
| 49 | 0,00292 | A*01:01:01G | C*04:01:01G | B*35:08:01  | DRB1*16:07     | DQB1*05:02:01G |
| 50 | 0,00292 | A*01:01:01G | C*06:02:01G | B*37:01:01G | DRB1*01:01:01G | DQB1*05:01:01G |
| 51 | 0,00292 | A*01:01:01G | C*12:03:01G | B*38:01:01  | DRB1*04:03:01  | DQB1*03:02:01G |
| 52 | 0,00292 | A*01:01:01G | C*07:02:01G | B*39:03     | DRB1*07:01:01G | DQB1*02:01:01G |
| 53 | 0,00292 | A*01:01:01G | C*08:01:01G | B*40:01:01G | DRB1*04:03:01  | DQB1*03:01:01G |
| 54 | 0,00292 | A*01:01:01G | C*03:04:01G | B*40:04     | DRB1*07:01:01G | DQB1*03:03:02G |
| 55 | 0,00292 | A*01:01:01G | C*05:01:01G | B*44:02:01G | DRB1*07:01:01G | DQB1*02:01:01G |
| 56 | 0,00292 | A*01:01:01G | C*16:01:01G | B*44:03:01G | DRB1*04:01:01G | DQB1*03:02:01G |
| 57 | 0,00292 | A*01:01:01G | C*07:01:01G | B*49:01:01G | DRB1*01:03     | DQB1*05:01:01G |
| 58 | 0,00292 | A*01:01:01G | C*04:01:01G | B*51:01:01G | DRB1*13:01:01G | DQB1*06:03:01G |
| 59 | 0,00292 | A*01:01:01G | C*16:01:01G | B*51:01:01G | DRB1*04:07:01G | DQB1*06:04:01G |
| 60 | 0,00292 | A*01:01:01G | C*03:03:01G | B*55:01:01G | DRB1*07:01:01G | DQB1*03:03:02G |
| 61 | 0,00292 | A*01:01:01G | C*07:01:01G | B*55:01:01G | DRB1*04:03:01  | DQB1*03:01:01G |
| 62 | 0,00292 | A*01:01:01G | C*06:02:01G | B*57:01:01G | DRB1*04:02:01  | DQB1*03:02:01G |
| 63 | 0,00292 | A*01:01:01G | C*06:02:01G | B*58:02:01  | DRB1*15:01:01G | DQB1*03:01:01G |
| 64 | 0,00292 | A*01:104    | C*07:01:01G | B*57:01:01G | DRB1*11:01:01G | DQB1*03:01:01G |
| 65 | 0,00292 | A*02:01:01G | C*07:02:01G | B*07:02:01G | DRB1*01:03     | DQB1*05:01:01G |
| 66 | 0,00292 | A*02:01:01G | C*07:02:01G | B*07:02:01G | DRB1*04:02:01  | DQB1*03:02:01G |
| 67 | 0,00292 | A*02:01:01G | C*07:02:01G | B*07:02:01G | DRB1*07:01:01G | DQB1*06:02:01G |
| 68 | 0,00292 | A*02:01:01G | C*07:02:01G | B*07:02:01G | DRB1*08:02:01  | DQB1*03:02:01G |
| 69 | 0,00292 | A*02:01:01G | C*07:02:01G | B*07:02:01G | DRB1*15:01:01G | DQB1*05:03:01G |
| 70 | 0,00292 | A*02:01:01G | C*06:02:01G | B*08:01:01G | DRB1*11:04:01G | DQB1*02:01:01G |
| 71 | 0,00292 | A*02:01:01G | C*07:01:01G | B*08:01:01G | DRB1*07:01:01G | DQB1*02:01:01G |
| 72 | 0,00292 | A*02:01:01G | C*16:04:01  | B*13:02:01G | DRB1*10:01:01G | DQB1*05:01:01G |
| 73 | 0,00292 | A*02:01:01G | C*12:03:01G | B*14:01:01  | DRB1*07:01:01G | DQB1*02:01:01G |
| 74 | 0,00292 | A*02:01:01G | C*02:02:02G | B*14:02:01G | DRB1*01:03     | DQB1*05:01:01G |

|     |         |             |             |             |                |                |
|-----|---------|-------------|-------------|-------------|----------------|----------------|
| 75  | 0,00292 | A*02:01:01G | C*06:02:01G | B*15:01:01G | DRB1*07:01:01G | DQB1*03:03:02G |
| 76  | 0,00292 | A*02:01:01G | C*07:02:01G | B*15:01:01G | DRB1*12:01:01G | DQB1*03:01:01G |
| 77  | 0,00292 | A*02:01:01G | C*07:04:01G | B*15:09     | DRB1*11:01:01G | DQB1*03:01:01G |
| 78  | 0,00292 | A*02:01:01G | C*06:02:01G | B*18:01:01G | DRB1*04:03:01  | DQB1*06:03:01G |
| 79  | 0,00292 | A*02:01:01G | C*07:01:01G | B*18:01:01G | DRB1*11:04:01G | DQB1*03:01:01G |
| 80  | 0,00292 | A*02:01:01G | C*12:03:01G | B*18:01:01G | DRB1*11:04:01G | DQB1*03:01:01G |
| 81  | 0,00292 | A*02:01:01G | C*02:02:02G | B*27:02:01  | DRB1*04:01:01G | DQB1*03:02:01G |
| 82  | 0,00292 | A*02:01:01G | C*02:02:02G | B*27:02:01  | DRB1*15:01:01G | DQB1*06:02:01G |
| 83  | 0,00292 | A*02:01:01G | C*02:02:02G | B*27:05:02G | DRB1*07:01:01G | DQB1*03:03:02G |
| 84  | 0,00292 | A*02:01:01G | C*02:02:02G | B*27:05:03  | DRB1*04:04:01  | DQB1*03:02:01G |
| 85  | 0,00292 | A*02:01:01G | C*04:01:01G | B*35:01:01G | DRB1*13:01:01G | DQB1*03:03:02G |
| 86  | 0,00292 | A*02:01:01G | C*04:01:01G | B*35:01:01G | DRB1*16:01:01  | DQB1*05:02:01G |
| 87  | 0,00292 | A*02:01:01G | C*06:02:01G | B*35:01:01G | DRB1*13:01:01G | DQB1*06:03:01G |
| 88  | 0,00292 | A*02:01:01G | C*04:01:01G | B*35:02:01G | DRB1*03:01:01G | DQB1*02:01:01G |
| 89  | 0,00292 | A*02:01:01G | C*07:01:01G | B*35:02:01G | DRB1*16:01:01  | DQB1*05:02:01G |
| 90  | 0,00292 | A*02:01:01G | C*08:02:01G | B*35:08:01  | DRB1*16:01:01  | DQB1*05:02:01G |
| 91  | 0,00292 | A*02:01:01G | C*07:02:01G | B*35:09:01  | DRB1*04:03:01  | DQB1*05:03:01G |
| 92  | 0,00292 | A*02:01:01G | C*12:03:01G | B*38:01:01  | DRB1*01:02:01  | DQB1*05:03:01G |
| 93  | 0,00292 | A*02:01:01G | C*12:03:01G | B*38:01:01  | DRB1*13:01:01G | DQB1*06:03:01G |
| 94  | 0,00292 | A*02:01:01G | C*14:02:01G | B*38:01:01  | DRB1*01:03     | DQB1*05:01:01G |
| 95  | 0,00292 | A*02:01:01G | C*07:02:01G | B*39:03     | DRB1*15:01:01G | DQB1*03:02:01G |
| 96  | 0,00292 | A*02:01:01G | C*07:02:01G | B*39:06:02  | DRB1*16:01:01  | DQB1*06:04:01G |
| 97  | 0,00292 | A*02:01:01G | C*17:01:01G | B*41:01:01  | DRB1*11:02:01  | DQB1*03:01:01G |
| 98  | 0,00292 | A*02:01:01G | C*05:01:01G | B*44:02:01G | DRB1*04:01:01G | DQB1*03:01:01G |
| 99  | 0,00292 | A*02:01:01G | C*05:01:01G | B*44:02:01G | DRB1*04:04:01  | DQB1*03:02:01G |
| 100 | 0,00292 | A*02:01:01G | C*05:01:01G | B*44:02:01G | DRB1*11:01:01G | DQB1*03:01:01G |

|     |         |             |             |             |                |                |
|-----|---------|-------------|-------------|-------------|----------------|----------------|
| 101 | 0,00292 | A*02:01:01G | C*07:01:01G | B*44:02:01G | DRB1*03:01:01G | DQB1*03:01:01G |
| 102 | 0,00292 | A*02:01:01G | C*04:01:01G | B*44:03:01G | DRB1*04:02:01  | DQB1*03:02:01G |
| 103 | 0,00292 | A*02:01:01G | C*08:01:01G | B*48:01:01G | DRB1*08:02:01  | DQB1*04:02:01G |
| 104 | 0,00292 | A*02:01:01G | C*01:02:01G | B*51:01:01G | DRB1*11:01:01G | DQB1*03:01:01G |
| 105 | 0,00292 | A*02:01:01G | C*02:02:02G | B*51:01:01G | DRB1*03:01:01G | DQB1*02:01:01G |
| 106 | 0,00292 | A*02:01:01G | C*02:02:02G | B*51:01:01G | DRB1*13:03:01  | DQB1*02:01:01G |
| 107 | 0,00292 | A*02:01:01G | C*07:02:01G | B*51:01:01G | DRB1*01:01:01G | DQB1*05:01:01G |
| 108 | 0,00292 | A*02:01:01G | C*12:03:01G | B*51:01:01G | DRB1*11:01:01G | DQB1*03:01:01G |
| 109 | 0,00292 | A*02:01:01G | C*14:02:01G | B*51:01:01G | DRB1*14:01:01G | DQB1*05:03:01G |
| 110 | 0,00292 | A*02:01:01G | C*15:02:01G | B*51:01:01G | DRB1*04:07:01G | DQB1*03:02:01G |
| 111 | 0,00292 | A*02:01:01G | C*15:02:01G | B*51:01:01G | DRB1*11:04:01G | DQB1*02:01:01G |
| 112 | 0,00292 | A*02:01:01G | C*15:02:01G | B*51:01:01G | DRB1*13:01:01G | DQB1*03:01:01G |
| 113 | 0,00292 | A*02:01:01G | C*16:02:01G | B*51:01:01G | DRB1*03:01:01G | DQB1*03:01:01G |
| 114 | 0,00292 | A*02:01:01G | C*15:02:01G | B*51:08:01  | DRB1*04:11:01  | DQB1*03:01:01G |
| 115 | 0,00292 | A*02:01:01G | C*04:01:01G | B*53:01:01G | DRB1*13:02:01G | DQB1*06:04:01G |
| 116 | 0,00292 | A*02:01:01G | C*03:03:01G | B*55:01:01G | DRB1*15:01:01G | DQB1*06:02:01G |
| 117 | 0,00292 | A*02:01:01G | C*03:03:01G | B*55:01:01G | DRB1*16:01:01  | DQB1*05:02:01G |
| 118 | 0,00292 | A*02:01:01G | C*03:04:01G | B*57:01:01G | DRB1*07:01:01G | DQB1*06:04:01G |
| 119 | 0,00292 | A*02:01:01G | C*07:01:01G | B*57:01:01G | DRB1*13:01:01G | DQB1*03:02:01G |
| 120 | 0,00292 | A*02:01:01G | C*07:01:01G | B*57:03:01G | DRB1*04:11:01  | DQB1*03:02:01G |
| 121 | 0,00292 | A*02:01:01G | C*07:01:01G | B*58:01:01G | DRB1*07:01:01G | DQB1*03:01:01G |
| 122 | 0,00292 | A*02:02:01G | C*17:01:01G | B*41:01:01  | DRB1*04:05:01  | DQB1*02:01:01G |
| 123 | 0,00292 | A*02:04     | C*15:02:01G | B*51:01:01G | DRB1*04:11:01  | DQB1*04:02:01G |
| 124 | 0,00292 | A*02:05:01G | C*07:01:01G | B*15:17:01G | DRB1*04:07:01G | DQB1*03:01:01G |
| 125 | 0,00292 | A*02:05:01G | C*06:02:01G | B*15:20     | DRB1*13:01:01G | DQB1*02:01:01G |
| 126 | 0,00292 | A*02:05:01G | C*03:03:01G | B*50:01:01G | DRB1*09:01:02G | DQB1*02:01:01G |

|     |         |             |             |             |                |                |
|-----|---------|-------------|-------------|-------------|----------------|----------------|
| 127 | 0,00292 | A*02:06:01G | C*08:03:01G | B*48:01:01G | DRB1*04:03:01  | DQB1*03:04:01  |
| 128 | 0,00292 | A*02:11:01G | C*03:04:01G | B*48:02:01  | DRB1*16:02:01G | DQB1*03:01:01G |
| 129 | 0,00292 | A*02:11:01G | C*04:01:01G | B*48:02:01  | DRB1*11:03:01  | DQB1*03:01:01G |
| 130 | 0,00292 | A*02:13     | C*05:01:01G | B*44:02:01G | DRB1*13:01:01G | DQB1*06:03:01G |
| 131 | 0,00292 | A*03:01:01G | C*04:01:01G | B*07:02:01G | DRB1*14:01:01G | DQB1*03:02:01G |
| 132 | 0,00292 | A*03:01:01G | C*07:02:01G | B*07:02:01G | DRB1*08:01:01G | DQB1*04:02:01G |
| 133 | 0,00292 | A*03:01:01G | C*07:02:01G | B*07:02:01G | DRB1*15:01:01G | DQB1*05:03:01G |
| 134 | 0,00292 | A*03:01:01G | C*12:03:01G | B*07:02:01G | DRB1*13:02:01G | DQB1*05:02:01G |
| 135 | 0,00292 | A*03:01:01G | C*03:04:01G | B*14:01:01  | DRB1*04:01:01G | DQB1*03:01:01G |
| 136 | 0,00292 | A*03:01:01G | C*03:04:01G | B*14:02:01G | DRB1*04:07:01G | DQB1*03:02:01G |
| 137 | 0,00292 | A*03:01:01G | C*07:04:01G | B*15:18:01G | DRB1*13:01:01G | DQB1*06:03:01G |
| 138 | 0,00292 | A*03:01:01G | C*07:02:01G | B*18:01:01G | DRB1*13:05:01  | DQB1*03:01:01G |
| 139 | 0,00292 | A*03:01:01G | C*07:02:01G | B*27:05:02G | DRB1*11:01:01G | DQB1*03:02:01G |
| 140 | 0,00292 | A*03:01:01G | C*08:02:01G | B*27:05:02G | DRB1*01:01:01G | DQB1*05:01:01G |
| 141 | 0,00292 | A*03:01:01G | C*04:01:01G | B*35:01:01G | DRB1*16:02:01G | DQB1*03:01:01G |
| 142 | 0,00292 | A*03:01:01G | C*12:03:01G | B*35:01:01G | DRB1*13:03:01  | DQB1*03:01:01G |
| 143 | 0,00292 | A*03:01:01G | C*04:01:01G | B*35:03:01G | DRB1*11:01:01G | DQB1*03:01:01G |
| 144 | 0,00292 | A*03:01:01G | C*04:01:01G | B*39:14     | DRB1*14:02:01  | DQB1*03:01:01G |
| 145 | 0,00292 | A*03:01:01G | C*08:02:01G | B*40:01:01G | DRB1*01:01:01G | DQB1*05:01:01G |
| 146 | 0,00292 | A*03:01:01G | C*02:02:02G | B*44:05:01  | DRB1*11:01:01G | DQB1*03:01:01G |
| 147 | 0,00292 | A*03:01:01G | C*06:02:01G | B*47:01:01G | DRB1*04:05:01  | DQB1*03:02:01G |
| 148 | 0,00292 | A*03:01:01G | C*07:02:01G | B*51:01:01G | DRB1*04:07:01G | DQB1*03:01:01G |
| 149 | 0,00292 | A*03:01:01G | C*14:02:01G | B*51:01:01G | DRB1*07:01:01G | DQB1*02:01:01G |
| 150 | 0,00292 | A*03:01:01G | C*06:02:01G | B*53:01:01G | DRB1*07:01:01G | DQB1*06:03:01G |
| 151 | 0,00292 | A*03:02:01G | C*15:02:01G | B*51:01:01G | DRB1*04:04:01  | DQB1*03:02:01G |
| 152 | 0,00292 | A*03:02:01G | C*15:02:01G | B*51:01:01G | DRB1*11:01:01G | DQB1*03:01:01G |



|     |         |             |             |             |                |                |
|-----|---------|-------------|-------------|-------------|----------------|----------------|
| 153 | 0,00292 | A*11:01:01G | C*04:01:01G | B*14:02:01G | DRB1*01:02:01  | DQB1*05:01:01G |
| 154 | 0,00292 | A*11:01:01G | C*02:02:02G | B*27:05:02G | DRB1*14:01:01G | DQB1*06:02:01G |
| 155 | 0,00292 | A*11:01:01G | C*04:01:01G | B*38:01:01  | DRB1*13:01:01G | DQB1*02:01:01G |
| 156 | 0,00292 | A*11:01:01G | C*12:03:01G | B*38:01:01  | DRB1*07:01:01G | DQB1*05:02:01G |
| 157 | 0,00292 | A*11:01:01G | C*03:03:01G | B*40:01:01G | DRB1*01:01:01G | DQB1*05:01:01G |
| 158 | 0,00292 | A*11:01:01G | C*05:01:01G | B*44:02:01G | DRB1*01:01:01G | DQB1*05:01:01G |
| 159 | 0,00292 | A*11:01:01G | C*16:01:01G | B*44:03:01G | DRB1*11:01:01G | DQB1*03:01:01G |
| 160 | 0,00292 | A*11:01:01G | C*16:01:01G | B*44:03:01G | DRB1*13:01:01G | DQB1*06:03:01G |
| 161 | 0,00292 | A*11:01:01G | C*07:01:01G | B*49:01:01G | DRB1*14:02:01  | DQB1*06:09:01G |
| 162 | 0,00292 | A*11:01:01G | C*06:02:01G | B*50:02     | DRB1*04:06:01G | DQB1*04:02:01G |
| 163 | 0,00292 | A*11:01:01G | C*02:02:02G | B*51:01:01G | DRB1*04:04:01  | DQB1*03:02:01G |
| 164 | 0,00292 | A*11:01:01G | C*03:03:01G | B*51:01:01G | DRB1*09:01:02G | DQB1*03:03:02G |
| 165 | 0,00292 | A*11:01:01G | C*15:02:01G | B*51:01:01G | DRB1*15:01:01G | DQB1*06:02:01G |
| 166 | 0,00292 | A*11:01:01G | C*03:04:01G | B*55:01:01G | DRB1*04:04:01  | DQB1*03:02:01G |
| 167 | 0,00292 | A*11:01:01G | C*07:01:01G | B*58:01:01G | DRB1*11:04:01G | DQB1*02:01:01G |
| 168 | 0,00292 | A*23:01:01G | C*07:01:01G | B*18:01:01G | DRB1*11:04:01G | DQB1*03:01:01G |
| 169 | 0,00292 | A*23:01:01G | C*17:01:01G | B*41:01:01  | DRB1*01:01:01G | DQB1*06:04:01G |
| 170 | 0,00292 | A*23:01:01G | C*04:01:01G | B*44:03:01G | DRB1*16:01:01  | DQB1*02:01:01G |
| 171 | 0,00292 | A*23:01:01G | C*03:03:01G | B*49:01:01G | DRB1*11:04:01G | DQB1*03:02:01G |
| 172 | 0,00292 | A*23:01:01G | C*04:01:01G | B*50:01:01G | DRB1*07:01:01G | DQB1*02:01:01G |
| 173 | 0,00292 | A*24:02:01G | C*02:02:02G | B*07:02:01G | DRB1*04:02:01  | DQB1*03:01:01G |
| 174 | 0,00292 | A*24:02:01G | C*07:02:01G | B*07:02:01G | DRB1*04:04:01  | DQB1*06:02:01G |
| 175 | 0,00292 | A*24:02:01G | C*08:02:01G | B*14:02:01G | DRB1*01:01:01G | DQB1*05:01:01G |
| 176 | 0,00292 | A*24:02:01G | C*15:02:01G | B*27:05:02G | DRB1*04:01:01G | DQB1*03:01:01G |
| 177 | 0,00292 | A*24:02:01G | C*04:01:01G | B*35:02:01G | DRB1*01:02:01  | DQB1*03:01:01G |
| 178 | 0,00292 | A*24:02:01G | C*04:01:01G | B*35:03:01G | DRB1*14:01:01G | DQB1*05:03:01G |

|     |         |             |             |             |                |                |
|-----|---------|-------------|-------------|-------------|----------------|----------------|
| 179 | 0,00292 | A*24:02:01G | C*04:01:01G | B*38:01:01  | DRB1*13:01:01G | DQB1*06:03:01G |
| 180 | 0,00292 | A*24:02:01G | C*12:03:01G | B*38:01:01  | DRB1*04:02:01  | DQB1*03:02:01G |
| 181 | 0,00292 | A*24:02:01G | C*07:02:01G | B*39:01:01G | DRB1*13:02:01G | DQB1*06:04:01G |
| 182 | 0,00292 | A*24:02:01G | C*12:03:01G | B*39:01:01G | DRB1*08:02:01  | DQB1*04:02:01G |
| 183 | 0,00292 | A*24:02:01G | C*07:02:01G | B*39:03     | DRB1*14:06:01  | DQB1*03:01:01G |
| 184 | 0,00292 | A*24:02:01G | C*16:01:01G | B*39:09:01  | DRB1*10:01:01G | DQB1*05:01:01G |
| 185 | 0,00292 | A*24:02:01G | C*02:02:02G | B*40:02:01G | DRB1*04:05:01  | DQB1*03:02:01G |
| 186 | 0,00292 | A*24:02:01G | C*03:05     | B*40:02:01G | DRB1*04:07:01G | DQB1*03:02:01G |
| 187 | 0,00292 | A*24:02:01G | C*07:02:01G | B*45:01:01G | DRB1*08:02:01  | DQB1*03:02:01G |
| 188 | 0,00292 | A*24:02:01G | C*16:01:01G | B*45:01:01G | DRB1*14:01:01G | DQB1*05:03:01G |
| 189 | 0,00292 | A*24:02:01G | C*12:03:01G | B*50:01:01G | DRB1*07:01:01G | DQB1*02:01:01G |
| 190 | 0,00292 | A*24:02:01G | C*01:02:01G | B*51:01:01G | DRB1*07:01:01G | DQB1*03:02:01G |
| 191 | 0,00292 | A*24:02:01G | C*03:04:01G | B*53:01:01G | DRB1*13:02:01G | DQB1*06:04:01G |
| 192 | 0,00292 | A*24:02:01G | C*04:01:01G | B*56:01:01G | DRB1*08:02:01  | DQB1*05:01:01G |
| 193 | 0,00292 | A*24:02:01G | C*02:02:02G | B*78:01:01  | DRB1*11:03:01  | DQB1*05:01:01G |
| 194 | 0,00292 | A*24:03:01G | C*03:03:01G | B*18:01:01G | DRB1*07:01:01G | DQB1*04:02:01G |
| 195 | 0,00292 | A*24:03:01G | C*04:01:01G | B*35:05:01  | DRB1*04:04:01  | DQB1*03:02:01G |
| 196 | 0,00292 | A*24:03:01G | C*04:01:01G | B*40:02:01G | DRB1*09:01:02G | DQB1*03:03:02G |
| 197 | 0,00292 | A*24:03:01G | C*15:02:01G | B*51:01:01G | DRB1*08:07     | DQB1*04:02:01G |
| 198 | 0,00292 | A*24:03:01G | C*03:03:01G | B*55:01:01G | DRB1*14:01:01G | DQB1*05:02:01G |
| 199 | 0,00292 | A*25:01:01G | C*07:02:01G | B*07:02:01G | DRB1*01:01:01G | DQB1*05:01:01G |
| 200 | 0,00292 | A*25:01:01G | C*07:02:01G | B*39:05:01  | DRB1*13:01:01G | DQB1*04:02:01G |
| 201 | 0,00292 | A*25:01:01G | C*05:01:01G | B*44:02:01G | DRB1*11:04:01G | DQB1*05:03:01G |
| 202 | 0,00292 | A*25:01:01G | C*03:03:01G | B*55:01:01G | DRB1*09:01:02G | DQB1*05:03:01G |
| 203 | 0,00292 | A*26:01:01G | C*07:02:01G | B*07:02:01G | DRB1*04:01:01G | DQB1*03:01:01G |
| 204 | 0,00292 | A*26:01:01G | C*07:02:01G | B*07:02:01G | DRB1*11:03:01  | DQB1*03:01:01G |

|     |         |             |             |             |                |                |
|-----|---------|-------------|-------------|-------------|----------------|----------------|
| 205 | 0,00292 | A*26:01:01G | C*07:01:01G | B*08:01:01G | DRB1*07:01:01G | DQB1*06:02:01G |
| 206 | 0,00292 | A*26:01:01G | C*01:02:01G | B*14:01:01  | DRB1*01:03     | DQB1*05:01:01G |
| 207 | 0,00292 | A*26:01:01G | C*07:04:01G | B*15:18:01G | DRB1*13:01:01G | DQB1*06:03:01G |
| 208 | 0,00292 | A*26:01:01G | C*07:01:01G | B*18:01:01G | DRB1*13:05:01  | DQB1*03:01:01G |
| 209 | 0,00292 | A*26:01:01G | C*07:02:01G | B*18:01:01G | DRB1*07:01:01G | DQB1*02:01:01G |
| 210 | 0,00292 | A*26:01:01G | C*07:01:01G | B*27:07:01G | DRB1*13:01:01G | DQB1*06:03:01G |
| 211 | 0,00292 | A*26:01:01G | C*04:01:01G | B*35:01:01G | DRB1*13:02:01G | DQB1*03:01:01G |
| 212 | 0,00292 | A*26:01:01G | C*04:01:01G | B*35:20:01  | DRB1*08:02:01  | DQB1*04:02:01G |
| 213 | 0,00292 | A*26:01:01G | C*12:03:01G | B*38:01:01  | DRB1*08:01:01G | DQB1*04:02:01G |
| 214 | 0,00292 | A*26:01:01G | C*15:02:01G | B*51:01:01G | DRB1*11:01:01G | DQB1*03:01:01G |
| 215 | 0,00292 | A*26:01:01G | C*16:02:01G | B*51:01:01G | DRB1*07:01:01G | DQB1*06:03:01G |
| 216 | 0,00292 | A*29:01:01G | C*07:01:01G | B*18:01:01G | DRB1*14:01:01G | DQB1*03:01:01G |
| 217 | 0,00292 | A*29:02:01G | C*07:01:01G | B*08:01:01G | DRB1*15:01:01G | DQB1*05:01:01G |
| 218 | 0,00292 | A*29:02:01G | C*04:01:01G | B*35:01:01G | DRB1*07:01:01G | DQB1*02:01:01G |
| 219 | 0,00292 | A*29:02:01G | C*04:01:01G | B*35:01:01G | DRB1*16:01:01  | DQB1*05:02:01G |
| 220 | 0,00292 | A*29:02:01G | C*16:01:01G | B*44:03:01G | DRB1*03:01:01G | DQB1*02:01:01G |
| 221 | 0,00292 | A*29:02:01G | C*16:01:01G | B*44:03:01G | DRB1*11:03:01  | DQB1*03:01:01G |
| 222 | 0,00292 | A*29:02:01G | C*15:02:01G | B*51:01:01G | DRB1*04:02:01  | DQB1*03:02:01G |
| 223 | 0,00292 | A*30:01:01G | C*07:02:01G | B*07:02:01G | DRB1*07:01:01G | DQB1*03:03:02G |
| 224 | 0,00292 | A*30:01:01G | C*04:01:01G | B*37:01:01G | DRB1*10:01:01G | DQB1*05:01:01G |
| 225 | 0,00292 | A*30:01:01G | C*07:02:01G | B*39:01:01G | DRB1*14:01:01G | DQB1*05:03:01G |
| 226 | 0,00292 | A*30:01:01G | C*02:02:02G | B*44:03:01G | DRB1*13:02:01G | DQB1*05:01:01G |
| 227 | 0,00292 | A*30:01:01G | C*02:02:02G | B*44:05:01  | DRB1*01:01:01G | DQB1*05:01:01G |
| 228 | 0,00292 | A*30:02:01G | C*06:02:01G | B*13:02:01G | DRB1*01:01:01G | DQB1*05:01:01G |
| 229 | 0,00292 | A*30:02:01G | C*12:03:01G | B*39:01:01G | DRB1*14:01:01G | DQB1*05:01:01G |
| 230 | 0,00292 | A*30:02:01G | C*07:01:01G | B*49:01:01G | DRB1*13:01:01G | DQB1*03:01:01G |

|     |         |             |             |             |                |                |
|-----|---------|-------------|-------------|-------------|----------------|----------------|
| 231 | 0,00292 | A*30:04:01G | C*07:01:01G | B*08:01:01G | DRB1*13:03:01  | DQB1*06:02:01G |
| 232 | 0,00292 | A*31:01:02G | C*03:03:01G | B*13:02:01G | DRB1*13:01:01G | DQB1*03:01:01G |
| 233 | 0,00292 | A*31:01:02G | C*07:01:01G | B*18:01:01G | DRB1*08:02:01  | DQB1*06:03:01G |
| 234 | 0,00292 | A*31:01:02G | C*04:01:01G | B*35:01:01G | DRB1*01:01:01G | DQB1*05:01:01G |
| 235 | 0,00292 | A*31:01:02G | C*04:01:01G | B*35:09:01  | DRB1*04:07:01G | DQB1*03:02:01G |
| 236 | 0,00292 | A*31:01:02G | C*04:01:01G | B*35:20:01  | DRB1*16:02:01G | DQB1*02:01:01G |
| 237 | 0,00292 | A*31:01:02G | C*07:02:01G | B*39:02:02  | DRB1*16:02:01G | DQB1*03:01:01G |
| 238 | 0,00292 | A*31:01:02G | C*07:02:01G | B*39:03     | DRB1*04:04:01  | DQB1*03:02:01G |
| 239 | 0,00292 | A*31:01:02G | C*07:02:01G | B*39:03     | DRB1*13:02:01G | DQB1*03:01:01G |
| 240 | 0,00292 | A*31:01:02G | C*01:02:01G | B*39:05:01  | DRB1*04:07:03  | DQB1*03:02:01G |
| 241 | 0,00292 | A*31:01:02G | C*15:02:01G | B*40:02:01G | DRB1*16:01:01  | DQB1*05:02:01G |
| 242 | 0,00292 | A*31:01:02G | C*15:05:01G | B*40:02:01G | DRB1*01:02:01  | DQB1*05:01:01G |
| 243 | 0,00292 | A*31:01:02G | C*04:01:01G | B*44:03:01G | DRB1*04:02:01  | DQB1*02:01:01G |
| 244 | 0,00292 | A*31:01:02G | C*01:02:01G | B*49:18:02  | DRB1*04:02:01  | DQB1*02:01:01G |
| 245 | 0,00292 | A*31:01:02G | C*15:02:01G | B*52:01:02  | DRB1*10:01:01G | DQB1*05:01:01G |
| 246 | 0,00292 | A*31:01:02G | C*12:03:01G | B*67:01:02G | DRB1*01:02:01  | DQB1*05:01:01G |
| 247 | 0,00292 | A*32:01:01G | C*08:02:01G | B*14:01:01  | DRB1*04:05:01  | DQB1*03:01:01G |
| 248 | 0,00292 | A*32:01:01G | C*06:02:01G | B*15:01:01G | DRB1*11:01:01G | DQB1*06:03:01G |
| 249 | 0,00292 | A*32:01:01G | C*07:01:01G | B*18:01:01G | DRB1*11:04:01G | DQB1*03:01:01G |
| 250 | 0,00292 | A*32:01:01G | C*07:02:01G | B*18:01:01G | DRB1*04:03:01  | DQB1*03:02:01G |
| 251 | 0,00292 | A*32:01:01G | C*06:02:01G | B*35:01:01G | DRB1*13:05:01  | DQB1*03:01:01G |
| 252 | 0,00292 | A*32:01:01G | C*07:02:01G | B*39:06:02  | DRB1*14:01:01G | DQB1*05:03:01G |
| 253 | 0,00292 | A*32:01:01G | C*02:02:02G | B*40:02:01G | DRB1*07:01:01G | DQB1*02:01:01G |
| 254 | 0,00292 | A*32:01:01G | C*07:01:01G | B*44:03:02G | DRB1*04:01:01G | DQB1*03:02:01G |
| 255 | 0,00292 | A*32:01:01G | C*16:02:01G | B*52:01:02  | DRB1*13:03:01  | DQB1*03:02:01G |
| 256 | 0,00292 | A*33:01:01G | C*07:02:01G | B*07:02:01G | DRB1*15:01:01G | DQB1*06:03:01G |

|     |         |             |             |             |                |                |
|-----|---------|-------------|-------------|-------------|----------------|----------------|
| 257 | 0,00292 | A*33:01:01G | C*16:01:01G | B*14:02:01G | DRB1*01:02:01  | DQB1*03:01:01G |
| 258 | 0,00292 | A*33:01:01G | C*06:02:01G | B*40:01:01G | DRB1*13:02:01G | DQB1*03:03:02G |
| 259 | 0,00292 | A*33:01:01G | C*14:02:01G | B*51:01:01G | DRB1*13:02:01G | DQB1*06:04:01G |
| 260 | 0,00292 | A*66:01:01G | C*07:01:01G | B*15:01:01G | DRB1*07:01:01G | DQB1*03:02:01G |
| 261 | 0,00292 | A*68:01:01G | C*04:01:01G | B*35:01:01G | DRB1*13:01:01G | DQB1*06:03:01G |
| 262 | 0,00292 | A*68:01:01G | C*04:01:01G | B*35:03:01G | DRB1*04:04:01  | DQB1*03:02:01G |
| 263 | 0,00292 | A*68:01:01G | C*04:01:01G | B*35:03:01G | DRB1*15:01:01G | DQB1*06:02:01G |
| 264 | 0,00292 | A*68:01:01G | C*05:01:01G | B*44:02:01G | DRB1*11:04:01G | DQB1*03:01:01G |
| 265 | 0,00292 | A*68:01:02G | C*03:03:01G | B*13:02:01G | DRB1*08:01:01G | DQB1*04:02:01G |
| 266 | 0,00292 | A*68:01:02G | C*07:01:01G | B*18:01:01G | DRB1*04:11:01  | DQB1*03:02:01G |
| 267 | 0,00292 | A*68:01:02G | C*01:02:01G | B*35:09:01  | DRB1*13:02:01G | DQB1*03:02:01G |
| 268 | 0,00292 | A*68:01:02G | C*03:04:01G | B*40:01:01G | DRB1*01:02:01  | DQB1*05:01:01G |
| 269 | 0,00292 | A*68:01:02G | C*03:04:01G | B*40:02:01G | DRB1*14:01:01G | DQB1*03:03:02G |
| 270 | 0,00292 | A*68:01:02G | C*04:01:01G | B*44:03:01G | DRB1*08:02:01  | DQB1*03:02:01G |
| 271 | 0,00292 | A*68:02:01G | C*04:01:01G | B*53:01:01G | DRB1*11:04:01G | DQB1*05:01:01G |
| 272 | 0,00292 | A*68:17     | C*07:02:01G | B*35:01:01G | DRB1*13:05:01  | DQB1*03:01:01G |
| 273 | 0,00292 | A*68:17     | C*03:04:01G | B*35:19     | DRB1*04:01:01G | DQB1*03:02:01G |
| 274 | 0,00292 | A*68:23     | C*01:02:01G | B*48:01:01G | DRB1*09:01:02G | DQB1*03:03:02G |
| 275 | 0,00292 | A*74:01:01G | C*04:01:01G | B*40:01:01G | DRB1*04:05:01  | DQB1*03:02:01G |
| 276 | 0,00292 | A*80:01:01G | C*02:02:02G | B*40:02:01G | DRB1*13:03:01  | DQB1*06:03:01G |
| 277 | 0,00292 | A*80:01:01G | C*17:01:01G | B*41:02:01G | DRB1*12:01:01G | DQB1*03:01:01G |

Supplementary Table 6: Estimated haplotypes and frequencies for SAA group  
 Five-locus haplotype frequencies (A~C~B~DRB1~DQB1) were estimated for SAA group, using the iterative expectation maximization (EM) algorithm ( $\epsilon=1e^{-7}$ ).

| Pos | Freq    | Haplotype   |             |             |                |                |
|-----|---------|-------------|-------------|-------------|----------------|----------------|
| 1   | 0,27174 | A*01:01:01G | C*07:01:01G | B*08:01:01G | DRB1*03:01:01G | DQB1*02:01:01G |
| 2   | 0,01359 | A*03:01:01G | C*07:02:01G | B*07:02:01G | DRB1*15:01:01G | DQB1*06:02:01G |
| 3   | 0,01359 | A*29:02:01G | C*16:01:01G | B*44:03:01G | DRB1*07:01:01G | DQB1*02:01:01G |
| 4   | 0,01087 | A*31:01:02G | C*03:03:01G | B*15:04:01G | DRB1*16:02:01G | DQB1*03:01:01G |
| 5   | 0,00815 | A*02:01:01G | C*05:01:01G | B*44:02:01G | DRB1*07:01:01G | DQB1*02:01:01G |
| 6   | 0,00815 | A*02:01:01G | C*15:02:01G | B*51:01:01G | DRB1*11:02:01  | DQB1*03:01:01G |
| 7   | 0,00815 | A*24:03:01G | C*03:04:01G | B*40:02:01G | DRB1*16:02:01G | DQB1*03:01:01G |
| 8   | 0,00815 | A*26:01:01G | C*12:03:01G | B*38:01:01  | DRB1*13:01:01G | DQB1*06:03:01G |
| 9   | 0,00815 | A*29:02:01G | C*16:01:01G | B*44:03:01G | DRB1*03:01:01G | DQB1*02:01:01G |
| 10  | 0,00815 | A*30:02:01G | C*05:01:01G | B*18:01:01G | DRB1*03:01:01G | DQB1*02:01:01G |
| 11  | 0,00815 | A*31:01:02G | C*04:01:01G | B*35:04:01  | DRB1*08:07     | DQB1*04:02:01G |
| 12  | 0,00815 | A*68:01:02G | C*04:01:01G | B*35:05:01  | DRB1*09:01:02G | DQB1*03:03:02G |
| 13  | 0,00544 | A*01:01:01G | C*15:02:01G | B*51:01:01G | DRB1*04:02:01  | DQB1*03:02:01G |
| 14  | 0,00544 | A*01:01:01G | C*06:02:01G | B*57:01:01G | DRB1*07:01:01G | DQB1*02:01:01G |
| 15  | 0,00544 | A*01:01:01G | C*06:02:01G | B*57:01:01G | DRB1*09:01:02G | DQB1*03:03:02G |
| 16  | 0,00544 | A*02:01:01G | C*07:02:01G | B*07:02:01G | DRB1*15:01:01G | DQB1*06:02:01G |
| 17  | 0,00544 | A*02:01:01G | C*08:02:01G | B*14:02:01G | DRB1*08:02:01  | DQB1*04:02:01G |
| 18  | 0,00544 | A*02:01:01G | C*07:01:01G | B*18:01:01G | DRB1*11:04:01G | DQB1*03:01:01G |
| 19  | 0,00544 | A*02:01:01G | C*04:01:01G | B*35:05:01  | DRB1*04:04:01  | DQB1*03:02:01G |
| 20  | 0,00544 | A*02:01:01G | C*07:02:01G | B*39:05:01  | DRB1*04:04:01  | DQB1*03:02:01G |
| 21  | 0,00544 | A*02:01:01G | C*03:04:01G | B*40:01:01G | DRB1*04:04:01  | DQB1*03:02:01G |
| 22  | 0,00544 | A*02:01:01G | C*02:02:02G | B*40:02:01G | DRB1*11:01:01G | DQB1*03:01:01G |
| 23  | 0,00544 | A*02:01:01G | C*03:04:01G | B*40:04     | DRB1*04:11:01  | DQB1*03:02:01G |
| 24  | 0,00544 | A*02:01:01G | C*05:01:01G | B*44:02:01G | DRB1*04:01:01G | DQB1*03:01:01G |

|    |         |             |             |             |                |                |
|----|---------|-------------|-------------|-------------|----------------|----------------|
| 25 | 0,00544 | A*02:01:01G | C*08:01:01G | B*48:01:01G | DRB1*04:07:01G | DQB1*03:02:01G |
| 26 | 0,00544 | A*02:01:01G | C*07:01:01G | B*51:01:01G | DRB1*13:01:01G | DQB1*03:01:01G |
| 27 | 0,00544 | A*02:01:01G | C*15:02:01G | B*51:01:01G | DRB1*07:01:01G | DQB1*02:01:01G |
| 28 | 0,00544 | A*02:01:01G | C*06:02:01G | B*57:01:01G | DRB1*07:01:01G | DQB1*03:03:02G |
| 29 | 0,00544 | A*02:04     | C*15:02:01G | B*51:01:01G | DRB1*07:01:01G | DQB1*04:02:01G |
| 30 | 0,00544 | A*02:11:01G | C*03:04:01G | B*15:01:01G | DRB1*08:04:01  | DQB1*03:01:01G |
| 31 | 0,00544 | A*03:01:01G | C*12:03:01G | B*18:01:01G | DRB1*04:03:01  | DQB1*03:01:01G |
| 32 | 0,00544 | A*03:01:01G | C*12:03:01G | B*35:03:01G | DRB1*14:01:01G | DQB1*05:03:01G |
| 33 | 0,00544 | A*03:01:01G | C*03:04:01G | B*40:04     | DRB1*04:11:01  | DQB1*03:02:01G |
| 34 | 0,00544 | A*24:02:01G | C*07:01:01G | B*08:01:01G | DRB1*03:01:01G | DQB1*02:01:01G |
| 35 | 0,00544 | A*24:02:01G | C*04:01:01G | B*35:05:01  | DRB1*04:04:01  | DQB1*03:02:01G |
| 36 | 0,00544 | A*24:02:01G | C*05:01:01G | B*44:02:01G | DRB1*01:01:01G | DQB1*05:01:01G |
| 37 | 0,00544 | A*24:02:01G | C*04:01:01G | B*51:01:01G | DRB1*11:04:01G | DQB1*03:01:01G |
| 38 | 0,00544 | A*24:02:01G | C*12:02:01G | B*52:01:01G | DRB1*15:02:01G | DQB1*06:01:01G |
| 39 | 0,00544 | A*25:01:01G | C*07:01:01G | B*58:01:01G | DRB1*13:01:01G | DQB1*06:03:01G |
| 40 | 0,00544 | A*29:02:01G | C*16:01:01G | B*44:03:01G | DRB1*13:01:01G | DQB1*06:03:01G |
| 41 | 0,00544 | A*31:01:02G | C*03:03:01G | B*15:01:01G | DRB1*13:01:01G | DQB1*06:03:01G |
| 42 | 0,00544 | A*31:01:02G | C*04:01:01G | B*35:01:01G | DRB1*01:01:01G | DQB1*05:01:01G |
| 43 | 0,00544 | A*32:01:01G | C*04:01:01G | B*35:01:01G | DRB1*11:01:01G | DQB1*03:01:01G |
| 44 | 0,00544 | A*33:01:01G | C*08:02:01G | B*14:02:01G | DRB1*01:02:01  | DQB1*05:01:01G |
| 45 | 0,00544 | A*68:01:02G | C*03:04:01G | B*40:04     | DRB1*14:02:01  | DQB1*03:01:01G |
| 46 | 0,00272 | A*01:01:01G | C*07:01:01G | B*08:01:01G | DRB1*08:01:01G | DQB1*04:02:01G |
| 47 | 0,00272 | A*01:01:01G | C*07:01:01G | B*08:01:01G | DRB1*13:02:01G | DQB1*06:09:01G |
| 48 | 0,00272 | A*01:01:01G | C*07:206    | B*08:01:01G | DRB1*11:01:02  | DQB1*05:02:01G |
| 49 | 0,00272 | A*01:01:01G | C*06:02:01G | B*13:02:01G | DRB1*11:01:01G | DQB1*03:01:01G |
| 50 | 0,00272 | A*01:01:01G | C*01:02:01G | B*15:01:01G | DRB1*10:01:01G | DQB1*02:01:01G |
| 51 | 0,00272 | A*01:01:01G | C*07:01:01G | B*15:01:01G | DRB1*13:01:01G | DQB1*06:03:01G |
| 52 | 0,00272 | A*01:01:01G | C*05:01:01G | B*18:01:01G | DRB1*07:01:01G | DQB1*03:01:01G |

|    |         |             |             |             |                |                |
|----|---------|-------------|-------------|-------------|----------------|----------------|
| 53 | 0,00272 | A*01:01:01G | C*01:02:01G | B*27:05:02G | DRB1*13:01:01G | DQB1*03:01:01G |
| 54 | 0,00272 | A*01:01:01G | C*04:01:01G | B*35:01:01G | DRB1*11:04:01G | DQB1*03:02:01G |
| 55 | 0,00272 | A*01:01:01G | C*06:02:01G | B*37:01:01G | DRB1*11:01:01G | DQB1*03:01:01G |
| 56 | 0,00272 | A*01:01:01G | C*06:02:01G | B*37:01:01G | DRB1*11:03:01  | DQB1*03:01:01G |
| 57 | 0,00272 | A*01:01:01G | C*07:01:01G | B*39:05:01  | DRB1*13:02:01G | DQB1*06:04:01G |
| 58 | 0,00272 | A*01:01:01G | C*07:02:01G | B*39:06:02  | DRB1*13:02:01G | DQB1*06:04:01G |
| 59 | 0,00272 | A*01:01:01G | C*15:02:01G | B*40:06:01G | DRB1*14:04:01  | DQB1*05:03:01G |
| 60 | 0,00272 | A*01:01:01G | C*03:04:01G | B*41:01:01  | DRB1*03:01:01G | DQB1*03:02:01G |
| 61 | 0,00272 | A*01:01:01G | C*03:04:01G | B*44:02:01G | DRB1*13:01:01G | DQB1*06:03:01G |
| 62 | 0,00272 | A*01:01:01G | C*07:01:01G | B*49:01:01G | DRB1*04:07:03  | DQB1*03:01:01G |
| 63 | 0,00272 | A*01:01:01G | C*06:02:01G | B*51:08:01  | DRB1*16:01:01  | DQB1*03:01:01G |
| 64 | 0,00272 | A*02:01:01G | C*07:01:01G | B*07:02:01G | DRB1*07:01:01G | DQB1*02:01:01G |
| 65 | 0,00272 | A*02:01:01G | C*07:02:01G | B*07:02:01G | DRB1*03:01:01G | DQB1*02:01:01G |
| 66 | 0,00272 | A*02:01:01G | C*07:02:01G | B*07:02:01G | DRB1*08:02:01  | DQB1*05:01:01G |
| 67 | 0,00272 | A*02:01:01G | C*08:01:01G | B*07:02:01G | DRB1*04:05:04  | DQB1*04:02:01G |
| 68 | 0,00272 | A*02:01:01G | C*05:09:01  | B*07:05:01G | DRB1*04:03:01  | DQB1*06:03:01G |
| 69 | 0,00272 | A*02:01:01G | C*06:02:01G | B*13:02:01G | DRB1*11:04:01G | DQB1*04:02:01G |
| 70 | 0,00272 | A*02:01:01G | C*03:03:01G | B*15:01:01G | DRB1*13:01:01G | DQB1*05:01:01G |
| 71 | 0,00272 | A*02:01:01G | C*03:04:01G | B*15:01:01G | DRB1*13:02:01G | DQB1*06:04:01G |
| 72 | 0,00272 | A*02:01:01G | C*03:04:02  | B*15:01:01G | DRB1*04:01:01G | DQB1*06:02:01G |
| 73 | 0,00272 | A*02:01:01G | C*04:01:01G | B*15:01:01G | DRB1*08:07     | DQB1*03:02:01G |
| 74 | 0,00272 | A*02:01:01G | C*16:01:01G | B*15:01:01G | DRB1*04:01:01G | DQB1*05:03:01G |
| 75 | 0,00272 | A*02:01:01G | C*01:02:01G | B*15:04:01G | DRB1*14:02:01  | DQB1*03:01:01G |
| 76 | 0,00272 | A*02:01:01G | C*03:03:01G | B*15:04:01G | DRB1*16:02:01G | DQB1*03:02:01G |
| 77 | 0,00272 | A*02:01:01G | C*03:04:01G | B*15:04:01G | DRB1*14:02:01  | DQB1*03:01:01G |
| 78 | 0,00272 | A*02:01:01G | C*04:01:01G | B*15:04:01G | DRB1*14:02:01  | DQB1*03:01:01G |
| 79 | 0,00272 | A*02:01:01G | C*07:02:01G | B*15:04:01G | DRB1*04:03:01  | DQB1*03:02:01G |
| 80 | 0,00272 | A*02:01:01G | C*07:02:01G | B*15:10:01  | DRB1*01:02:01  | DQB1*05:01:01G |



|     |         |             |             |             |                |                |
|-----|---------|-------------|-------------|-------------|----------------|----------------|
| 81  | 0,00272 | A*02:01:01G | C*02:02:02G | B*18:01:01G | DRB1*11:01:01G | DQB1*06:03:01G |
| 82  | 0,00272 | A*02:01:01G | C*07:01:01G | B*18:01:01G | DRB1*09:01:02G | DQB1*03:03:02G |
| 83  | 0,00272 | A*02:01:01G | C*02:02:02G | B*27:05:02G | DRB1*04:11:01  | DQB1*03:03:02G |
| 84  | 0,00272 | A*02:01:01G | C*04:01:01G | B*35:01:01G | DRB1*11:01:01G | DQB1*06:03:01G |
| 85  | 0,00272 | A*02:01:01G | C*03:03:01G | B*35:02:01G | DRB1*04:01:01G | DQB1*03:02:01G |
| 86  | 0,00272 | A*02:01:01G | C*03:04:01G | B*35:04:01  | DRB1*04:11:01  | DQB1*03:02:01G |
| 87  | 0,00272 | A*02:01:01G | C*04:01:01G | B*35:04:01  | DRB1*14:02:01  | DQB1*06:03:01G |
| 88  | 0,00272 | A*02:01:01G | C*15:02:01G | B*35:04:01  | DRB1*08:02:01  | DQB1*03:01:01G |
| 89  | 0,00272 | A*02:01:01G | C*04:01:01G | B*35:05:01  | DRB1*07:01:01G | DQB1*02:01:01G |
| 90  | 0,00272 | A*02:01:01G | C*07:02:01G | B*35:05:01  | DRB1*08:02:01  | DQB1*05:01:01G |
| 91  | 0,00272 | A*02:01:01G | C*06:02:01G | B*35:08:01  | DRB1*11:04:01G | DQB1*03:01:01G |
| 92  | 0,00272 | A*02:01:01G | C*07:01:01G | B*35:20:01  | DRB1*03:01:01G | DQB1*02:01:01G |
| 93  | 0,00272 | A*02:01:01G | C*06:02:01G | B*37:01:01G | DRB1*07:01:01G | DQB1*05:01:01G |
| 94  | 0,00272 | A*02:01:01G | C*07:02:01G | B*39:01:01G | DRB1*01:03     | DQB1*03:02:01G |
| 95  | 0,00272 | A*02:01:01G | C*07:02:01G | B*39:03     | DRB1*04:04:01  | DQB1*03:02:01G |
| 96  | 0,00272 | A*02:01:01G | C*07:02:01G | B*39:03     | DRB1*09:01:02G | DQB1*03:02:01G |
| 97  | 0,00272 | A*02:01:01G | C*01:02:01G | B*39:05:01  | DRB1*09:01:02G | DQB1*03:03:02G |
| 98  | 0,00272 | A*02:01:01G | C*07:02:01G | B*39:05:01  | DRB1*11:02:01  | DQB1*03:02:01G |
| 99  | 0,00272 | A*02:01:01G | C*07:02:01G | B*39:09:01  | DRB1*16:02:01G | DQB1*02:01:01G |
| 100 | 0,00272 | A*02:01:01G | C*03:04:01G | B*40:01:01G | DRB1*07:01:01G | DQB1*02:01:01G |
| 101 | 0,00272 | A*02:01:01G | C*03:04:01G | B*40:02:01G | DRB1*16:02:01G | DQB1*03:01:01G |
| 102 | 0,00272 | A*02:01:01G | C*07:01:01G | B*40:02:01G | DRB1*14:01:01G | DQB1*05:03:01G |
| 103 | 0,00272 | A*02:01:01G | C*05:01:01G | B*40:08     | DRB1*16:02:01G | DQB1*03:01:01G |
| 104 | 0,00272 | A*02:01:01G | C*05:01:01G | B*44:02:01G | DRB1*04:02:01  | DQB1*03:02:01G |
| 105 | 0,00272 | A*02:01:01G | C*05:01:01G | B*44:02:01G | DRB1*04:04:01  | DQB1*03:02:01G |
| 106 | 0,00272 | A*02:01:01G | C*06:02:01G | B*44:02:01G | DRB1*07:01:01G | DQB1*02:01:01G |
| 107 | 0,00272 | A*02:01:01G | C*06:02:01G | B*44:02:01G | DRB1*14:01:01G | DQB1*03:03:02G |
| 108 | 0,00272 | A*02:01:01G | C*04:01:01G | B*44:03:01G | DRB1*16:02:01G | DQB1*03:01:01G |

|     |         |             |             |             |                |                |
|-----|---------|-------------|-------------|-------------|----------------|----------------|
| 109 | 0,00272 | A*02:01:01G | C*16:01:01G | B*44:03:01G | DRB1*04:04:01  | DQB1*02:01:01G |
| 110 | 0,00272 | A*02:01:01G | C*16:01:01G | B*44:03:01G | DRB1*13:01:01G | DQB1*06:03:01G |
| 111 | 0,00272 | A*02:01:01G | C*07:02:01G | B*49:01:01G | DRB1*08:01:01G | DQB1*04:02:03  |
| 112 | 0,00272 | A*02:01:01G | C*03:03:01G | B*51:01:01G | DRB1*14:01:01G | DQB1*03:02:01G |
| 113 | 0,00272 | A*02:01:01G | C*12:03:01G | B*51:01:01G | DRB1*11:04:01G | DQB1*03:01:01G |
| 114 | 0,00272 | A*02:01:01G | C*14:02:01G | B*51:01:01G | DRB1*08:01:01G | DQB1*04:02:01G |
| 115 | 0,00272 | A*02:01:01G | C*15:02:01G | B*51:01:01G | DRB1*01:02:01  | DQB1*03:02:01G |
| 116 | 0,00272 | A*02:01:01G | C*15:02:01G | B*51:01:01G | DRB1*08:01:01G | DQB1*04:02:01G |
| 117 | 0,00272 | A*02:01:01G | C*15:02:01G | B*51:01:01G | DRB1*11:01:01G | DQB1*06:02:01G |
| 118 | 0,00272 | A*02:01:01G | C*15:03     | B*51:04     | DRB1*08:04:01  | DQB1*04:02:01G |
| 119 | 0,00272 | A*02:01:01G | C*08:02:01G | B*55:01:01G | DRB1*13:02:01G | DQB1*06:02:01G |
| 120 | 0,00272 | A*02:01:01G | C*07:01:01G | B*57:03:01G | DRB1*11:03:01  | DQB1*03:01:01G |
| 121 | 0,00272 | A*02:01:01G | C*07:01:01G | B*57:03:01G | DRB1*13:02:01G | DQB1*06:04:01G |
| 122 | 0,00272 | A*02:02:01G | C*06:02:01G | B*15:08:01  | DRB1*08:07     | DQB1*03:01:01G |
| 123 | 0,00272 | A*02:02:01G | C*17:01:01G | B*39:05:01  | DRB1*04:03:01  | DQB1*03:02:01G |
| 124 | 0,00272 | A*02:02:01G | C*17:01:01G | B*40:04     | DRB1*04:11:01  | DQB1*02:01:01G |
| 125 | 0,00272 | A*02:04     | C*15:02:01G | B*51:01:01G | DRB1*15:01:01G | DQB1*03:01:01G |
| 126 | 0,00272 | A*02:05:01G | C*06:02:01G | B*50:01:01G | DRB1*09:01:02G | DQB1*03:03:02G |
| 127 | 0,00272 | A*02:05:01G | C*07:01:01G | B*58:01:01G | DRB1*04:01:01G | DQB1*03:02:01G |
| 128 | 0,00272 | A*02:06:01G | C*15:02:01G | B*51:01:01G | DRB1*14:01:01G | DQB1*05:03:01G |
| 129 | 0,00272 | A*02:11:01G | C*12:03:01G | B*39:01:01G | DRB1*13:01:01G | DQB1*06:03:01G |
| 130 | 0,00272 | A*02:11:01G | C*03:04:01G | B*40:04     | DRB1*14:02:01  | DQB1*03:01:01G |
| 131 | 0,00272 | A*02:11:01G | C*04:01:01G | B*48:02:01  | DRB1*04:07:01G | DQB1*03:03:02G |
| 132 | 0,00272 | A*02:11:01G | C*04:01:01G | B*48:02:01  | DRB1*09:01:02G | DQB1*03:02:01G |
| 133 | 0,00272 | A*02:11:01G | C*04:01:01G | B*48:02:01  | DRB1*16:02:01G | DQB1*04:02:01G |
| 134 | 0,00272 | A*02:11:01G | C*16:01:01G | B*48:02:01  | DRB1*04:11:01  | DQB1*03:01:01G |
| 135 | 0,00272 | A*02:22:01G | C*04:01:01G | B*08:01:01G | DRB1*01:02:01  | DQB1*04:02:01G |
| 136 | 0,00272 | A*02:33     | C*04:01:01G | B*35:21     | DRB1*16:02:01G | DQB1*03:01:01G |

|     |         |             |             |             |                |                |
|-----|---------|-------------|-------------|-------------|----------------|----------------|
| 137 | 0,00272 | A*03:01:01G | C*07:02:01G | B*07:02:01G | DRB1*16:01:01  | DQB1*05:02:01G |
| 138 | 0,00272 | A*03:01:01G | C*08:02:01G | B*14:02:01G | DRB1*04:04:01  | DQB1*05:01:01G |
| 139 | 0,00272 | A*03:01:01G | C*15:02:01G | B*14:02:01G | DRB1*13:02:01G | DQB1*05:03:01G |
| 140 | 0,00272 | A*03:01:01G | C*07:01:01G | B*15:01:01G | DRB1*13:01:01G | DQB1*06:03:01G |
| 141 | 0,00272 | A*03:01:01G | C*07:01:01G | B*18:01:01G | DRB1*11:04:01G | DQB1*03:01:01G |
| 142 | 0,00272 | A*03:01:01G | C*12:03:01G | B*18:01:01G | DRB1*07:01:01G | DQB1*03:03:02G |
| 143 | 0,00272 | A*03:01:01G | C*01:02:01G | B*27:05:02G | DRB1*13:01:01G | DQB1*05:01:01G |
| 144 | 0,00272 | A*03:01:01G | C*04:01:01G | B*35:01:01G | DRB1*01:01:01G | DQB1*05:01:01G |
| 145 | 0,00272 | A*03:01:01G | C*06:02:01G | B*35:02:01G | DRB1*11:04:01G | DQB1*03:01:01G |
| 146 | 0,00272 | A*03:01:01G | C*04:01:01G | B*35:04:01  | DRB1*01:02:01  | DQB1*05:01:01G |
| 147 | 0,00272 | A*03:01:01G | C*08:02:01G | B*39:05:01  | DRB1*04:07:03  | DQB1*03:02:01G |
| 148 | 0,00272 | A*03:01:01G | C*07:01:01G | B*40:01:01G | DRB1*03:01:01G | DQB1*02:01:01G |
| 149 | 0,00272 | A*03:01:01G | C*07:04:01G | B*40:01:01G | DRB1*13:02:01G | DQB1*06:04:01G |
| 150 | 0,00272 | A*03:01:01G | C*08:02:01G | B*44:02:01G | DRB1*04:02:01  | DQB1*05:01:01G |
| 151 | 0,00272 | A*03:01:01G | C*07:01:01G | B*44:03:01G | DRB1*01:02:01  | DQB1*05:01:01G |
| 152 | 0,00272 | A*03:01:01G | C*08:01:01G | B*48:01:01G | DRB1*12:01:01G | DQB1*03:01:01G |
| 153 | 0,00272 | A*03:01:01G | C*03:03:01G | B*51:01:01G | DRB1*11:01:01G | DQB1*03:01:01G |
| 154 | 0,00272 | A*03:01:01G | C*08:02:01G | B*51:01:01G | DRB1*14:01:01G | DQB1*06:09:01G |
| 155 | 0,00272 | A*03:01:01G | C*14:02:01G | B*51:01:01G | DRB1*04:07:01G | DQB1*04:02:01G |
| 156 | 0,00272 | A*03:02:01G | C*16:04:01  | B*14:02:01G | DRB1*10:01:01G | DQB1*03:02:01G |
| 157 | 0,00272 | A*03:08     | C*07:02:01G | B*08:01:01G | DRB1*04:03:01  | DQB1*03:02:01G |
| 158 | 0,00272 | A*11:01:01G | C*07:01:01G | B*08:01:01G | DRB1*03:01:01G | DQB1*02:01:01G |
| 159 | 0,00272 | A*11:01:01G | C*06:02:01G | B*13:02:01G | DRB1*13:01:01G | DQB1*06:03:01G |
| 160 | 0,00272 | A*11:01:01G | C*08:02:01G | B*14:01:01  | DRB1*01:03     | DQB1*03:02:01G |
| 161 | 0,00272 | A*11:01:01G | C*08:02:01G | B*14:01:01  | DRB1*04:11:01  | DQB1*02:01:01G |
| 162 | 0,00272 | A*11:01:01G | C*02:02:02G | B*15:01:01G | DRB1*04:01:01G | DQB1*03:04:01  |
| 163 | 0,00272 | A*11:01:01G | C*04:01:01G | B*15:01:01G | DRB1*08:02:01  | DQB1*05:02:01G |
| 164 | 0,00272 | A*11:01:01G | C*02:02:02G | B*27:05:02G | DRB1*07:01:01G | DQB1*03:03:02G |

|     |         |             |             |             |                |                |
|-----|---------|-------------|-------------|-------------|----------------|----------------|
| 165 | 0,00272 | A*11:01:01G | C*04:01:01G | B*35:01:01G | DRB1*08:01:01G | DQB1*03:01:01G |
| 166 | 0,00272 | A*11:01:01G | C*04:01:01G | B*35:01:01G | DRB1*15:01:01G | DQB1*05:01:01G |
| 167 | 0,00272 | A*11:01:01G | C*12:03:01G | B*38:01:01  | DRB1*01:01:01G | DQB1*06:03:01G |
| 168 | 0,00272 | A*11:01:01G | C*07:02:01G | B*39:05:01  | DRB1*04:04:01  | DQB1*03:02:01G |
| 169 | 0,00272 | A*11:01:01G | C*07:02:01G | B*39:09:01  | DRB1*08:02:01  | DQB1*04:02:01G |
| 170 | 0,00272 | A*11:01:01G | C*15:02:01G | B*40:04     | DRB1*04:07:01G | DQB1*03:02:01G |
| 171 | 0,00272 | A*11:01:01G | C*05:01:01G | B*44:02:01G | DRB1*04:02:01  | DQB1*03:02:01G |
| 172 | 0,00272 | A*11:01:01G | C*07:01:01G | B*44:02:01G | DRB1*14:01:01G | DQB1*05:03:01G |
| 173 | 0,00272 | A*11:01:01G | C*06:02:01G | B*44:03:01G | DRB1*07:01:01G | DQB1*02:01:01G |
| 174 | 0,00272 | A*11:01:01G | C*16:01:01G | B*50:01:01G | DRB1*03:01:01G | DQB1*02:01:01G |
| 175 | 0,00272 | A*11:01:01G | C*12:02:01G | B*51:01:01G | DRB1*04:08:01  | DQB1*06:01:01G |
| 176 | 0,00272 | A*11:01:01G | C*15:02:01G | B*51:01:01G | DRB1*13:01:01G | DQB1*03:01:01G |
| 177 | 0,00272 | A*11:01:01G | C*03:04:01G | B*52:01:02  | DRB1*15:01:01G | DQB1*06:02:01G |
| 178 | 0,00272 | A*23:01:01G | C*06:02:01G | B*07:02:01G | DRB1*01:02:01  | DQB1*05:01:01G |
| 179 | 0,00272 | A*23:01:01G | C*02:10:01G | B*15:03:01G | DRB1*11:01:02  | DQB1*03:01:01G |
| 180 | 0,00272 | A*23:01:01G | C*04:01:01G | B*35:01:01G | DRB1*01:01:01G | DQB1*03:01:01G |
| 181 | 0,00272 | A*23:01:01G | C*04:01:01G | B*44:03:01G | DRB1*03:01:01G | DQB1*02:01:01G |
| 182 | 0,00272 | A*23:01:01G | C*15:05:01G | B*45:01:01G | DRB1*04:08:01  | DQB1*03:01:01G |
| 183 | 0,00272 | A*23:01:01G | C*06:02:01G | B*53:01:01G | DRB1*08:04:01  | DQB1*03:01:01G |
| 184 | 0,00272 | A*23:01:01G | C*07:01:01G | B*58:01:01G | DRB1*04:02:01  | DQB1*03:01:01G |
| 185 | 0,00272 | A*24:02:01G | C*08:02:01G | B*14:01:01  | DRB1*04:05:01  | DQB1*02:01:01G |
| 186 | 0,00272 | A*24:02:01G | C*02:02:02G | B*14:02:01G | DRB1*13:02:01G | DQB1*06:04:01G |
| 187 | 0,00272 | A*24:02:01G | C*03:03:01G | B*15:01:01G | DRB1*12:01:01G | DQB1*06:03:01G |
| 188 | 0,00272 | A*24:02:01G | C*03:03:01G | B*15:04:01G | DRB1*13:01:01G | DQB1*03:03:02G |
| 189 | 0,00272 | A*24:02:01G | C*07:01:01G | B*15:17:01G | DRB1*15:01:01G | DQB1*03:01:01G |
| 190 | 0,00272 | A*24:02:01G | C*07:02:01G | B*15:17:01G | DRB1*04:07:03  | DQB1*03:02:01G |
| 191 | 0,00272 | A*24:02:01G | C*07:04:01G | B*18:01:01G | DRB1*04:02:01  | DQB1*03:02:01G |
| 192 | 0,00272 | A*24:02:01G | C*02:02:02G | B*27:05:02G | DRB1*08:07     | DQB1*04:02:01G |

|     |         |             |             |             |                |                |
|-----|---------|-------------|-------------|-------------|----------------|----------------|
| 193 | 0,00272 | A*24:02:01G | C*04:01:01G | B*35:02:01G | DRB1*07:01:01G | DQB1*02:01:01G |
| 194 | 0,00272 | A*24:02:01G | C*04:01:01G | B*35:04:01  | DRB1*01:01:01G | DQB1*03:01:01G |
| 195 | 0,00272 | A*24:02:01G | C*12:03:01G | B*38:01:01  | DRB1*01:01:01G | DQB1*05:01:01G |
| 196 | 0,00272 | A*24:02:01G | C*07:02:01G | B*39:03     | DRB1*04:11:01  | DQB1*03:02:01G |
| 197 | 0,00272 | A*24:02:01G | C*08:03:01G | B*40:02:01G | DRB1*09:01:02G | DQB1*03:03:02G |
| 198 | 0,00272 | A*24:02:01G | C*03:04:01G | B*40:04     | DRB1*04:07:01G | DQB1*03:02:01G |
| 199 | 0,00272 | A*24:02:01G | C*16:02:01G | B*45:01:01G | DRB1*04:01:01G | DQB1*05:02:01G |
| 200 | 0,00272 | A*24:02:01G | C*07:04:01G | B*50:01:01G | DRB1*11:01:01G | DQB1*03:01:01G |
| 201 | 0,00272 | A*24:02:01G | C*15:02:01G | B*51:01:01G | DRB1*04:08:01  | DQB1*03:01:01G |
| 202 | 0,00272 | A*24:02:01G | C*06:02:01G | B*57:03:01G | DRB1*09:01:02G | DQB1*03:01:01G |
| 203 | 0,00272 | A*24:03:01G | C*07:02:01G | B*07:02:01G | DRB1*11:04:01G | DQB1*03:01:01G |
| 204 | 0,00272 | A*24:03:01G | C*03:03:01G | B*15:01:01G | DRB1*08:04:01  | DQB1*04:02:01G |
| 205 | 0,00272 | A*24:03:01G | C*01:02:01G | B*15:20     | DRB1*04:11:01  | DQB1*04:02:01G |
| 206 | 0,00272 | A*24:03:01G | C*05:01:01G | B*27:02:01  | DRB1*04:07:03  | DQB1*03:02:01G |
| 207 | 0,00272 | A*24:03:01G | C*04:01:01G | B*51:13:01  | DRB1*14:02:01  | DQB1*04:02:01G |
| 208 | 0,00272 | A*24:175    | C*07:02:01G | B*39:01:01G | DRB1*14:02:01  | DQB1*05:01:01G |
| 209 | 0,00272 | A*25:01:01G | C*12:03:01G | B*35:08:01  | DRB1*13:03:01  | DQB1*03:01:01G |
| 210 | 0,00272 | A*25:01:01G | C*15:02:01G | B*40:02:01G | DRB1*14:02:01  | DQB1*06:02:01G |
| 211 | 0,00272 | A*26:01:01G | C*03:03:01G | B*15:01:01G | DRB1*16:02:01G | DQB1*03:01:01G |
| 212 | 0,00272 | A*26:01:01G | C*04:01:01G | B*18:01:01G | DRB1*07:01:01G | DQB1*02:01:01G |
| 213 | 0,00272 | A*26:01:01G | C*07:02:01G | B*39:13:01  | DRB1*03:01:01G | DQB1*03:02:01G |
| 214 | 0,00272 | A*26:01:01G | C*01:02:01G | B*41:01:01  | DRB1*11:01:02  | DQB1*06:04:01G |
| 215 | 0,00272 | A*26:01:01G | C*14:02:01G | B*51:07:01  | DRB1*01:01:01G | DQB1*05:02:01G |
| 216 | 0,00272 | A*29:01:01G | C*15:05:01G | B*07:05:01G | DRB1*09:01:02G | DQB1*03:03:02G |
| 217 | 0,00272 | A*29:02:01G | C*03:04:01G | B*15:15     | DRB1*04:04:01  | DQB1*03:02:01G |
| 218 | 0,00272 | A*29:02:01G | C*14:02:01G | B*35:05:01  | DRB1*14:02:01  | DQB1*03:01:01G |
| 219 | 0,00272 | A*29:02:01G | C*03:04:01G | B*40:04     | DRB1*11:01:01G | DQB1*03:02:01G |
| 220 | 0,00272 | A*29:02:01G | C*04:01:01G | B*44:03:01G | DRB1*12:01:01G | DQB1*03:02:01G |

|     |         |             |             |             |                |                |
|-----|---------|-------------|-------------|-------------|----------------|----------------|
| 221 | 0,00272 | A*29:02:01G | C*16:01:01G | B*44:03:01G | DRB1*11:01:01G | DQB1*03:02:01G |
| 222 | 0,00272 | A*29:02:01G | C*06:02:01G | B*45:01:01G | DRB1*11:01:01G | DQB1*05:01:01G |
| 223 | 0,00272 | A*29:02:01G | C*07:01:01G | B*58:01:01G | DRB1*11:01:01G | DQB1*03:01:01G |
| 224 | 0,00272 | A*30:01:01G | C*06:02:01G | B*13:02:01G | DRB1*07:01:01G | DQB1*02:01:01G |
| 225 | 0,00272 | A*30:01:01G | C*06:02:01G | B*50:01:01G | DRB1*03:01:01G | DQB1*02:01:01G |
| 226 | 0,00272 | A*30:01:01G | C*05:01:01G | B*51:01:01G | DRB1*07:01:01G | DQB1*02:01:01G |
| 227 | 0,00272 | A*30:01:01G | C*04:01:01G | B*52:01:01G | DRB1*16:01:01  | DQB1*05:02:01G |
| 228 | 0,00272 | A*30:01:01G | C*06:02:01G | B*58:02:01  | DRB1*15:03:01G | DQB1*06:02:01G |
| 229 | 0,00272 | A*30:02:01G | C*03:03:01G | B*35:01:01G | DRB1*16:01:01  | DQB1*03:02:01G |
| 230 | 0,00272 | A*30:02:01G | C*12:02:01G | B*35:01:01G | DRB1*15:02:01G | DQB1*06:01:01G |
| 231 | 0,00272 | A*30:02:01G | C*03:04:01G | B*40:04     | DRB1*13:02:01G | DQB1*06:04:01G |
| 232 | 0,00272 | A*30:02:01G | C*18:01:01G | B*57:03:01G | DRB1*11:01:01G | DQB1*05:01:01G |
| 233 | 0,00272 | A*30:02:01G | C*07:01:01G | B*58:01:01G | DRB1*13:02:01G | DQB1*06:04:01G |
| 234 | 0,00272 | A*31:01:02G | C*03:04:01G | B*08:01:01G | DRB1*04:07:01G | DQB1*03:02:01G |
| 235 | 0,00272 | A*31:01:02G | C*04:01:01G | B*08:01:01G | DRB1*16:02:01G | DQB1*03:01:01G |
| 236 | 0,00272 | A*31:01:02G | C*07:02:01G | B*14:02:01G | DRB1*13:02:01G | DQB1*06:09:01G |
| 237 | 0,00272 | A*31:01:02G | C*03:03:01G | B*15:04:01G | DRB1*09:01:02G | DQB1*03:03:02G |
| 238 | 0,00272 | A*31:01:02G | C*01:02:01G | B*15:07:01G | DRB1*04:04:01  | DQB1*03:02:01G |
| 239 | 0,00272 | A*31:01:02G | C*07:01:01G | B*15:17:01G | DRB1*13:02:01G | DQB1*06:04:01G |
| 240 | 0,00272 | A*31:01:02G | C*04:01:01G | B*35:01:01G | DRB1*08:02:01  | DQB1*05:01:01G |
| 241 | 0,00272 | A*31:01:02G | C*08:03:01G | B*35:04:01  | DRB1*14:02:01  | DQB1*03:01:01G |
| 242 | 0,00272 | A*31:01:02G | C*03:04:01G | B*35:06     | DRB1*08:07     | DQB1*04:02:01G |
| 243 | 0,00272 | A*31:01:02G | C*04:01:01G | B*35:08:01  | DRB1*04:03:01  | DQB1*03:02:01G |
| 244 | 0,00272 | A*31:01:02G | C*03:04:02  | B*39:05:01  | DRB1*04:11:01  | DQB1*03:02:01G |
| 245 | 0,00272 | A*31:01:02G | C*07:02:01G | B*39:05:01  | DRB1*14:02:01  | DQB1*03:01:01G |
| 246 | 0,00272 | A*31:01:02G | C*03:03:01G | B*40:01:01G | DRB1*08:02:01  | DQB1*04:02:01G |
| 247 | 0,00272 | A*31:01:02G | C*03:04:01G | B*40:01:01G | DRB1*04:04:01  | DQB1*05:01:01G |
| 248 | 0,00272 | A*31:01:02G | C*03:03:01G | B*40:02:01G | DRB1*14:02:01  | DQB1*03:01:01G |

|     |         |             |             |             |                |                |
|-----|---------|-------------|-------------|-------------|----------------|----------------|
| 249 | 0,00272 | A*31:01:02G | C*03:04:01G | B*40:02:01G | DRB1*08:02:01  | DQB1*03:02:01G |
| 250 | 0,00272 | A*31:01:02G | C*07:02:01G | B*41:01:01  | DRB1*11:04:01G | DQB1*03:01:01G |
| 251 | 0,00272 | A*31:01:02G | C*15:05:01G | B*44:02:01G | DRB1*13:01:01G | DQB1*03:02:01G |
| 252 | 0,00272 | A*31:01:02G | C*06:02:01G | B*45:01:01G | DRB1*04:01:01G | DQB1*03:01:01G |
| 253 | 0,00272 | A*31:01:02G | C*07:02:01G | B*58:02:01  | DRB1*11:02:01  | DQB1*04:02:01G |
| 254 | 0,00272 | A*31:02     | C*04:01:01G | B*39:05:01  | DRB1*14:02:01  | DQB1*03:01:01G |
| 255 | 0,00272 | A*32:01:01G | C*07:02:01G | B*07:02:01G | DRB1*13:01:01G | DQB1*06:03:01G |
| 256 | 0,00272 | A*32:01:01G | C*03:03:01G | B*15:01:01G | DRB1*01:03     | DQB1*06:03:01G |
| 257 | 0,00272 | A*32:01:01G | C*16:04:01  | B*18:01:01G | DRB1*11:04:01G | DQB1*03:01:01G |
| 258 | 0,00272 | A*32:01:01G | C*02:02:02G | B*40:02:01G | DRB1*14:01:01G | DQB1*05:03:01G |
| 259 | 0,00272 | A*32:01:01G | C*03:04:01G | B*44:02:01G | DRB1*13:02:01G | DQB1*06:04:01G |
| 260 | 0,00272 | A*32:01:01G | C*15:02:01G | B*52:01:01G | DRB1*15:02:01G | DQB1*03:01:01G |
| 261 | 0,00272 | A*33:01:01G | C*03:03:01G | B*51:01:01G | DRB1*09:01:02G | DQB1*02:01:01G |
| 262 | 0,00272 | A*33:01:01G | C*02:02:02G | B*51:13:01  | DRB1*08:02:01  | DQB1*04:02:01G |
| 263 | 0,00272 | A*33:03:01G | C*05:01:01G | B*18:01:01G | DRB1*04:07:01G | DQB1*03:02:01G |
| 264 | 0,00272 | A*33:03:01G | C*04:01:01G | B*39:10:01  | DRB1*13:02:01G | DQB1*03:02:01G |
| 265 | 0,00272 | A*33:03:01G | C*03:02:01G | B*58:01:01G | DRB1*11:02:01  | DQB1*03:01:01G |
| 266 | 0,00272 | A*33:05     | C*08:02:01G | B*14:02:01G | DRB1*07:01:01G | DQB1*03:03:02G |
| 267 | 0,00272 | A*34:02:01  | C*06:02:01G | B*35:01:01G | DRB1*04:01:01G | DQB1*03:02:01G |
| 268 | 0,00272 | A*66:01:01G | C*17:01:01G | B*41:02:01G | DRB1*13:03:01  | DQB1*03:01:01G |
| 269 | 0,00272 | A*66:01:01G | C*07:04:01G | B*58:02:01  | DRB1*13:01:01G | DQB1*05:03:01G |
| 270 | 0,00272 | A*68:01:01G | C*02:14:01G | B*81:01:01G | DRB1*13:01:01G | DQB1*05:01:01G |
| 271 | 0,00272 | A*68:01:02G | C*07:02:01G | B*08:01:01G | DRB1*04:03:01  | DQB1*03:02:01G |
| 272 | 0,00272 | A*68:01:02G | C*01:02:01G | B*27:05:02G | DRB1*12:01:01G | DQB1*03:01:01G |
| 273 | 0,00272 | A*68:01:02G | C*04:01:01G | B*35:01:01G | DRB1*04:07:01G | DQB1*03:02:01G |
| 274 | 0,00272 | A*68:01:02G | C*04:01:01G | B*35:04:01  | DRB1*14:02:01  | DQB1*03:01:01G |
| 275 | 0,00272 | A*68:01:02G | C*12:03:01G | B*35:08:01  | DRB1*04:07:01G | DQB1*05:01:01G |
| 276 | 0,00272 | A*68:01:02G | C*04:01:01G | B*35:09:01  | DRB1*08:02:01  | DQB1*03:02:01G |

|     |         |             |             |             |                |                |
|-----|---------|-------------|-------------|-------------|----------------|----------------|
| 277 | 0,00272 | A*68:01:02G | C*07:02:01G | B*39:05:01  | DRB1*09:01:02G | DQB1*03:03:02G |
| 278 | 0,00272 | A*68:01:02G | C*15:02:01G | B*40:01:01G | DRB1*14:02:01  | DQB1*03:01:01G |
| 279 | 0,00272 | A*68:01:02G | C*07:04:01G | B*44:02:01G | DRB1*13:01:01G | DQB1*06:03:01G |
| 280 | 0,00272 | A*68:01:02G | C*16:01:01G | B*44:04     | DRB1*04:11:01  | DQB1*03:01:01G |
| 281 | 0,00272 | A*68:01:02G | C*02:02:02G | B*48:01:01G | DRB1*15:01:01G | DQB1*06:02:01G |
| 282 | 0,00272 | A*68:01:02G | C*08:03:01G | B*48:01:01G | DRB1*08:02:01  | DQB1*04:02:01G |
| 283 | 0,00272 | A*68:01:02G | C*03:04:01G | B*51:01:01G | DRB1*15:01:01G | DQB1*06:02:01G |
| 284 | 0,00272 | A*68:01:02G | C*15:02:01G | B*52:01:02  | DRB1*04:04:01  | DQB1*03:02:01G |
| 285 | 0,00272 | A*68:02:01G | C*03:04:01G | B*15:10:01  | DRB1*15:03:01G | DQB1*03:02:01G |
| 286 | 0,00272 | A*68:02:01G | C*04:01:01G | B*35:01:01G | DRB1*01:02:01  | DQB1*03:02:01G |
| 287 | 0,00272 | A*68:02:01G | C*04:01:01G | B*35:08:01  | DRB1*15:01:01G | DQB1*06:02:01G |
| 288 | 0,00272 | A*68:02:01G | C*04:01:01G | B*53:01:01G | DRB1*01:01:01G | DQB1*05:01:01G |
| 289 | 0,00272 | A*68:02:01G | C*04:01:01G | B*53:01:01G | DRB1*08:07     | DQB1*04:02:01G |
| 290 | 0,00272 | A*68:02:01G | C*07:01:01G | B*53:01:01G | DRB1*13:03:01  | DQB1*02:01:01G |
| 291 | 0,00272 | A*68:02:01G | C*16:01:01G | B*57:01:01G | DRB1*07:01:01G | DQB1*03:03:02G |
| 292 | 0,00272 | A*68:17     | C*04:01:01G | B*35:05:01  | DRB1*08:02:01  | DQB1*04:02:01G |
| 293 | 0,00272 | A*68:17     | C*08:01:01G | B*35:19     | DRB1*04:03:01  | DQB1*03:02:01G |
| 294 | 0,00272 | A*68:17     | C*08:01:01G | B*35:19     | DRB1*08:02:01  | DQB1*03:02:01G |
| 295 | 0,00272 | A*68:17     | C*04:01:01G | B*35:21     | DRB1*04:04:01  | DQB1*03:02:01G |
| 296 | 0,00272 | A*68:17     | C*04:01:01G | B*35:21     | DRB1*08:02:01  | DQB1*03:01:01G |
| 297 | 0,00272 | A*68:17     | C*07:02:01G | B*39:13:01  | DRB1*16:02:01G | DQB1*03:01:01G |
| 298 | 0,00272 | A*68:17     | C*07:02:01G | B*39:14     | DRB1*14:02:01  | DQB1*04:02:01G |
| 299 | 0,00272 | A*80:01:01G | C*17:01:01G | B*41:02:01G | DRB1*13:03:01  | DQB1*03:01:01G |



Supplementary Table 7: UCB units containing the LD for HLA-DRB1~HLA-DQB1.  
 Full genotypes of UCB units in SAE group containing the LD for DRB1\*15:01:01G~ DQB1\*02:01:01G.

| UCB | HLA-A     |           | HLA-B     |           | HLA-C     |           | HLA-DRB1  |           | HLA-DQB1  |           |
|-----|-----------|-----------|-----------|-----------|-----------|-----------|-----------|-----------|-----------|-----------|
| 1   | 01:01:01G | 23:01:01G | 44:03:01G | 50:01:01G | 04:01:01G | 06:02:01G | 07:01:01G | 15:01:01G | 02:01:01G | 06:02:01G |
| 2   | 01:01:01G | 26:01:01G | 08:01:01G | 14:01:01  | 07:01:01G | 08:02:01G | 07:01:01G | 15:01:01G | 02:01:01G | 06:02:01G |
| 3   | 01:01:01G | 29:02:01G | 07:05:01G | 44:03:01G | 15:05:01G | 16:01:01G | 07:01:01G | 15:01:01G | 02:01:01G | 06:02:01G |
| 4   | 24:02:01G | 26:01:01G | 07:02:01G | 18:01:01G | 07:01:01G | 07:02:01G | 07:01:01G | 15:01:01G | 02:01:01G | 06:02:01G |
| 5   | 01:01:01G | 02:01:01G | 08:01:01G | 44:03:01G | 06:02:01G | 07:01:01G | 07:01:01G | 15:01:01G | 02:01:01G | 06:02:01G |
| 6   | 03:01:01G | 30:02:01G | 07:02:01G | 18:01:01G | 05:01:01G | 07:02:01G | 03:01:01G | 15:01:01G | 02:01:01G | 06:02:01G |
| 7   | 01:01:01G | 02:01:01G | 07:02:01G | 14:01:01  | 07:02:01G | 08:02:01G | 07:01:01G | 15:01:01G | 02:01:01G | 06:02:01G |
| 8   | 01:01:01G | 02:01:01G | 44:02:01G | 44:03:01G | 05:01:01G | 16:01:01G | 07:01:01G | 15:01:01G | 02:01:01G | 06:02:01G |
